# Supplementary material for: A DNA Methylation Prognostic Signature of Glioblastoma: Identification of NPTX2-PTEN-NF-κB Nexus
Source: Oxford University Press journal article supplement (doi:10.1158/0008-5472.can-13-0298), 2013-09-28
Supplement: 00085472can130298-sup-tab4.xlsx [file 00085472can130298-sup-tab4.xlsx]

## Sheet: all genes
Table ST4: Differetially expressed genes between High risk and Low risk in TCGA data set
Upregulated genes in High risk
Gene Name	Description	High risk mean	Low risk mean	Fold change	p value
SAA1	Serum amyloid A1	4.84107	1.30021	3.54086	4.82917e-09
FABP5	Fatty acid binding protein 5 (psoriasis-associated)	1.23771	-1.71733	2.95504	1.5822e-11
LTF	Lactotransferrin	3.92132	1.07214	2.84918	2.41655e-08
RARRES2	Retinoic acid receptor responder (tazarotene induced) 2	0.998988	-1.61533	2.61432	1.99782e-08
G0S2	G0/G1switch 2	1.53751	-1.02597	2.56348	3.40347e-07
MOXD1	Monooxygenase, DBH-like 1	0.119509	-2.43181	2.55132	1.26956e-06
DDIT4L	DNA-damage-inducible transcript 4-like	1.47751	-0.978866	2.45637	1.68402e-06
FMOD	Fibromodulin	1.89151	-0.524812	2.41632	5.76482e-07
PDPN	Podoplanin	3.76859	1.47847	2.29012	3.49878e-06
SAA2	Serum amyloid A2	2.26756	0.00516592	2.26239	1.54858e-09
MAOB	Monoamine oxidase B	0.602876	-1.63214	2.23502	1.02188e-05
CA3	Carbonic anhydrase III, muscle specific	3.72671	1.51936	2.20735	2.75313e-06
NNMT	Nicotinamide N-methyltransferase	3.22444	1.01748	2.20695	2.35481e-06
MEOX2	Mesenchyme homeobox 2	3.7315	1.54798	2.18352	0.000215009
RBP1	Retinol binding protein 1, cellular	1.8236	-0.337071	2.16067	4.59225e-06
PLA2G2A	Phospholipase A2, group IIA (platelets, synovial fluid)	1.78043	-0.378153	2.15859	2.21508e-10
CXCL14	Chemokine (C-X-C motif) ligand 14	-0.808013	-2.94199	2.13398	3.15266e-05
LOX	Lysyl oxidase	3.07723	0.976856	2.10037	5.03701e-07
VASN	Vasorin	0.294312	-1.72751	2.02182	6.14265e-08
CHI3L2	Chitinase 3-like 2	4.24782	2.26488	1.98295	3.25027e-07
CHST6	Carbohydrate (N-acetylglucosamine 6-O) sulfotransferase 6	0.263197	-1.69967	1.96287	2.90306e-06
LGALS3	Lectin, galactoside-binding, soluble, 3	1.91985	-0.0252935	1.94514	3.19396e-05
OCIAD2	OCIA domain containing 2	0.620196	-1.29013	1.91033	1.05078e-05
MYBPH	Myosin binding protein H	2.53306	0.638073	1.89499	2.11977e-06
ABCC3	ATP-binding cassette, sub-family C (CFTR/MRP), member 3	3.98019	2.11421	1.86597	0.000107756
SLC47A2	Solute carrier family 47, member 2	3.77805	1.92825	1.8498	3.28784e-05
PTX3	Pentraxin-related gene, rapidly induced by IL-1 beta	3.44464	1.60894	1.8357	7.6587e-08
BIRC3	Baculoviral IAP repeat-containing 3	0.177389	-1.65109	1.82848	4.95906e-05
CBR1	Carbonyl reductase 1	0.298697	-1.52837	1.82707	3.87144e-06
FLJ21963		2.09989	0.295361	1.80453	1.1475e-05
FLNC	Filamin C, gamma (actin binding protein 280)	2.10156	0.309737	1.79183	6.31823e-08
PBEF1	Pre-B-cell colony enhancing factor 1	2.98141	1.19622	1.7852	2.57108e-11
TPPP3	Tubulin polymerization-promoting protein family member 3	-0.32477	-2.07687	1.7521	1.49072e-06
CHRDL2	Chordin-like 2	1.0075	-0.723945	1.73145	4.07211e-05
C2orf39	Chromosome 2 open reading frame 39	-0.552207	-2.28182	1.72962	0.000111049
LOC493869	Similar to RIKEN cDNA 2310016C16	2.98324	1.27241	1.71082	8.11008e-07
CHI3L1	Chitinase 3-like 1 (cartilage glycoprotein-39)	2.39482	0.690655	1.70417	4.81068e-07
RARRES1	Retinoic acid receptor responder (tazarotene induced) 1	0.873297	-0.823084	1.69638	1.01743e-05
MT1M	Metallothionein 1M	0.243619	-1.44319	1.68681	4.30441e-05
C1S	Complement component 1, s subcomponent	2.01599	0.32983	1.68616	2.04726e-06
TTC12	Tetratricopeptide repeat domain 12	-0.0665165	-1.73427	1.66776	4.04014e-07
RAB36	RAB36, member RAS oncogene family	-0.839723	-2.49882	1.6591	3.73782e-06
C21orf62	Chromosome 21 open reading frame 62	4.03815	2.38713	1.65102	1.41406e-05
ST8SIA644		2.98436	1.33453	1.64983	0.000123399
CCL2	Chemokine (C-C motif) ligand 2	1.43535	-0.179642	1.615	0.00015111
PLA2G5	Phospholipase A2, group V	0.880963	-0.729091	1.61005	7.35575e-05
ARL9	ADP-ribosylation factor-like 9	-0.565174	-2.17409	1.60891	2.0487e-05
SLPI	Secretory leukocyte peptidase inhibitor	1.66515	0.0592765	1.60588	6.69035e-06
RGN	Regucalcin (senescence marker protein-30)	1.41317	-0.181821	1.59499	0.000147782
CCDC109B	Coiled-coil domain containing 109B	1.98384	0.417407	1.56643	1.81261e-06
GJB2	Gap junction protein, beta 2, 26kDa	0.3398	-1.22593	1.56573	3.87461e-05
PNPLA4	Patatin-like phospholipase domain containing 4	-0.632052	-2.19249	1.56043	1.6374e-06
CCDC122	Coiled-coil domain containing 122	0.638032	-0.908238	1.54627	4.69231e-06
NSUN7	NOL1/NOP2/Sun domain family, member 7	0.928988	-0.603474	1.53246	0.000528503
ITGBL1	Integrin, beta-like 1 (with EGF-like repeat domains)	1.32431	-0.186346	1.51066	1.40183e-09
CFB	Complement factor B	0.867185	-0.64067	1.50785	5.68532e-07
TNFAIP6	Tumor necrosis factor, alpha-induced protein 6	2.06695	0.567639	1.49931	0.000115936
CMYA5	Cardiomyopathy associated 5	0.830311	-0.667702	1.49801	1.0019e-07
IL6	Interleukin 6 (interferon, beta 2)	0.519325	-0.966172	1.5	1.47796e-05
IL8	Interleukin 8	2.36225	0.887831	1.47442	1.34491e-05
F3	Coagulation factor III (thromboplastin, tissue factor)	-0.314955	-1.78871	1.47376	3.92203e-05
MSA		1.38206	-0.0896097	1.47167	1.52828e-05
DNAH9	Dynein, axonemal, heavy chain 9	2.26711	0.829148	1.43796	0.000294067
CYB5R2	Cytochrome b5 reductase 2	-1.0094	-2.44646	1.43706	1.11442e-05
MTTP	Microsomal triglyceride transfer protein	1.63261	0.205809	1.42681	0.000169864
KCNE4	Potassium voltage-gated channel, Isk-related family, member 4	1.36745	-0.126476	1.49392	2.18157e-06
RGS22	Regulator of G-protein signaling 22	0.636839	-0.783424	1.42026	2.43963e-05
C1RL	Complement component 1, r subcomponent-like	1.67187	0.254314	1.41755	4.19674e-08
NNAT	Neuronatin	-1.12944	-2.54424	1.4148	4.24307e-05
CFI	Complement factor I	3.15003	1.74917	1.40086	6.88532e-07
CLDN10	Claudin 10	-2.28636	-3.68589	1.39953	0.0011706
SNX10	Sorting nexin 10	-1.36193	-2.75921	1.39728	7.26083e-05
VDR	Vitamin D (1,25- dihydroxyvitamin D3) receptor	0.957828	-0.438304	1.39613	5.04109e-07
CAMP	Cathelicidin antimicrobial peptide	2.50595	1.10999	1.39596	1.02681e-05
IBSP	Integrin-binding sialoprotein (bone sialoprotein, bone sialoprotein II)	2.84974	1.45491	1.39483	0.000191293
SP8	Sp8 transcription factor	-0.0857679	-1.47118	1.38541	0.00046919
DIRAS3	DIRAS family, GTP-binding RAS-like 3	0.979551	-0.399659	1.37921	0.000130406
SOD2	Superoxide dismutase 2, mitochondrial	2.53745	1.1593	1.37815	1.05013e-06
MT1E	Metallothionein 1E	0.235578	-1.13915	1.37473	0.0001091
KIAA0746	KIAA0746 protein	-0.0568486	-1.43136	1.37451	3.21415e-05
SEMA3E	Sema domain, immunoglobulin domain (Ig), short basic domain, secreted, (semaphorin) 3E	-1.25706	-2.63101	1.37395	0.00602589
HRH1	Histamine receptor H1	0.715758	-0.650204	1.36596	1.57647e-06
SFRP4	Secreted frizzled-related protein 4	3.1715	1.82449	1.34701	0.000240988
DYNLT3	Dynein, light chain, Tctex-type 3	-0.624938	-1.96351	1.33857	9.72501e-07
S100A13	S100 calcium binding protein A13	0.0151015	-1.32129	1.33639	8.96108e-05
CLDN23	Claudin 23	1.58556	0.254306	1.33126	2.17311e-06
FABP7	Fatty acid binding protein 7, brain	0.929135	-0.40018	1.32931	0.00616675
S100A8	S100 calcium binding protein A8	1.78188	0.4595	1.32238	0.000404675
ADM	Adrenomedullin	2.18438	0.863322	1.32106	0.000271256
ANKRD35		0.00822032	-1.31012	1.31834	0.000223256
SERPINA3	Serpin peptidase inhibitor, clade A (alpha-1 antiproteinase, antitrypsin), member 3	3.91616	2.60015	1.31602	0.000264734
IL20RA	Interleukin 20 receptor, alpha	-0.523746	-1.83518	1.31143	1.34987e-05
RCAN1	Regulator of calcineurin 1	1.61304	0.306015	1.30702	8.04468e-07
B3GNT5	UDP-GlcNAc:betaGal beta-1,3-N-acetylglucosaminyltransferase 5	2.18997	0.89241	1.29756	7.92338e-05
EMP3	Epithelial membrane protein 3	1.92986	0.637087	1.29278	6.3982e-05
ANXA1	Annexin A1	2.86003	1.56741	1.29263	6.41459e-05
MYCBPAP	MYCBP associated protein	0.66488	-0.623345	1.28823	0.000190414
CCL27	Chemokine (C-C motif) ligand 27	0.780941	-0.504895	1.28584	5.71295e-05
SPP1	Secreted phosphoprotein 1 (osteopontin, bone sialoprotein I, early T-lymphocyte activation 1)	3.20398	1.92307	1.28091	0.0010807
GPNMB	Glycoprotein (transmembrane) nmb	2.01956	0.739098	1.28046	0.000406365
COL1A1	Collagen, type I, alpha 1	3.97736	2.69798	1.27939	0.00335219
ST8SIA550		1.77168	0.494006	1.27767	3.13991e-05
NR2E1	Nuclear receptor subfamily 2, group E, member 1	0.110851	-1.16492	1.27577	8.52449e-05
C9orf24	Chromosome 9 open reading frame 24	-2.62436	-3.8939	1.26954	0.00377394
HPR	Haptoglobin-related protein	1.007	-0.260244	1.26725	0.00219247
MOSC2	MOCO sulphurase C-terminal domain containing 2	-0.293617	-1.55581	1.26219	0.000158094
EFEMP2	EGF-containing fibulin-like extracellular matrix protein 2	1.36774	0.105736	1.26201	3.44758e-06
MT1JP		0.55524	-0.706496	1.26174	0.000104707
ST8SIA457		0.591133	-0.669538	1.26067	0.00305121
HRASLS3	HRAS-like suppressor 3	-0.0222746	-1.27993	1.25765	5.71116e-05
CLEC2B	C-type lectin domain family 2, member B	1.92025	0.666629	1.25362	1.70575e-05
AQP9	Aquaporin 9	0.134431	-1.11685	1.25128	0.000441667
EID3	EP300 interacting inhibitor of differentiation 3	-0.985034	-2.22823	1.2432	2.94452e-05
DPP4	Dipeptidyl-peptidase 4 (CD26, adenosine deaminase complexing protein 2)	1.04745	-0.192739	1.24019	7.37325e-05
KDELR3		1.31465	0.0748216	1.23983	1.8485e-06
COL1A2	Collagen, type I, alpha 2	2.32777	1.08807	1.23969	0.000121032
LOXL1	Lysyl oxidase-like 1	1.57167	0.332906	1.23876	0.000236986
GALNT3	UDP-N-acetyl-alpha-D-galactosamine:polypeptide N-acetylgalactosaminyltransferase 3 (GalNAc-T3)	1.6811	0.448132	1.23297	4.79043e-07
SEC61G	Sec61 gamma subunit	2.40449	1.17231	1.23218	0.00498768
GJA1	Gap junction protein, alpha 1, 43kDa	0.124965	-1.10689	1.23186	0.00201516
FAS	Fas (TNF receptor superfamily, member 6)	1.65613	0.42447	1.23166	8.80681e-05
FCGR2B	Fc fragment of IgG, low affinity IIb, receptor (CD32)	2.2013	0.969812	1.23149	0.000925133
CSTA	Cystatin A (stefin A)	3.82744	2.59919	1.22825	0.000358226
CP	Ceruloplasmin (ferroxidase)	2.72189	1.49584	1.22605	0.000525331
SOD3	Superoxide dismutase 3, extracellular	-0.271022	-1.4951	1.22407	7.68148e-05
RAB34	RAB34, member RAS oncogene family	0.830344	-0.390173	1.22052	0.000613166
UPP1	Uridine phosphorylase 1	1.70252	0.482807	1.21971	6.88725e-07
C4orf18	Chromosome 4 open reading frame 18	0.157504	-1.06208	1.21959	0.000145877
BANK1	B-cell scaffold protein with ankyrin repeats 1	-0.301729	-1.5158	1.21407	1.25763e-06
CNGA3	Cyclic nucleotide gated channel alpha 3	2.19686	0.984698	1.21216	0.000363581
GPR37	G protein-coupled receptor 37 (endothelin receptor type B-like)	-0.550907	-1.7617	1.21079	0.000523643
ABCA5	ATP-binding cassette, sub-family A (ABC1), member 5	-1.63519	-2.84536	1.21017	0.000197222
HSD11B1	Hydroxysteroid (11-beta) dehydrogenase 1	-2.3292	-3.53293	1.20373	1.71217e-05
C3orf14	Chromosome 3 open reading frame 14	-1.32792	-2.52956	1.20164	0.00288538
PPIC	Peptidylprolyl isomerase C (cyclophilin C)	2.35413	1.15388	1.20025	1.68253e-06
LECT1	Leukocyte cell derived chemotaxin 1	0.0401724	-1.15794	1.19811	0.000192719
MDFIC	MyoD family inhibitor domain containing	1.42254	0.228717	1.19383	1.63846e-06
NPNT	Nephronectin	1.60892	0.416263	1.19266	0.00183337
COL8A1	Collagen, type VIII, alpha 1	1.70122	0.513079	1.18814	2.59363e-06
FAM129A	Family with sequence similarity 129, member A	2.50909	1.32494	1.18414	2.81273e-05
GRIK1	Glutamate receptor, ionotropic, kainate 1	-0.883588	-2.06639	1.1828	0.00368146
CA12	Carbonic anhydrase XII	2.82335	1.64776	1.17558	0.000540215
PI3	Peptidase inhibitor 3, skin-derived (SKALP)	1.2886	0.115205	1.17339	9.67076e-07
NFKBIZ	Nuclear factor of kappa light polypeptide gene enhancer in B-cells inhibitor, zeta	1.28484	0.114111	1.17073	3.45502e-06
ALPK1	Alpha-kinase 1	1.62251	0.45242	1.17009	3.0939e-07
P2RY2	Purinergic receptor P2Y, G-protein coupled, 2	-0.343791	-1.51345	1.16966	6.93187e-07
CD2	CD2 molecule	1.84455	0.675762	1.16879	1.85949e-05
CTSK	Cathepsin K	1.64012	0.472215	1.16791	0.000124648
ZMYND12	Zinc finger, MYND-type containing 12	-0.167498	-1.33374	1.16624	6.411e-05
CHL1	Cell adhesion molecule with homology to L1CAM (close homolog of L1)	-0.809259	-1.97539	1.16613	0.00421035
XK	X-linked Kx blood group (McLeod syndrome)	-3.77823	-4.9443	1.16607	0.00237471
LTBP1	Latent transforming growth factor beta binding protein 1	1.32169	0.156251	1.16544	2.80395e-05
C3orf41		0.14768	-1.01663	1.16431	0.00190511
IQCA	IQ motif containing with AAA domain	-2.81559	-3.97913	1.16353	8.9594e-05
DKFZP586H2123	Regeneration associated muscle protease	-0.400758	-1.56038	1.15963	0.000208092
RP11-151A6.2	Hypothetical protein BC004360	0.663874	-0.494718	1.15859	1.06049e-05
TRIM6		1.3571	0.200921	1.15618	1.37028e-06
LGALS1	Lectin, galactoside-binding, soluble, 1 (galectin 1)	1.49607	0.339922	1.15615	3.99291e-07
FBXO17	F-box protein 17	0.412951	-0.741375	1.15433	2.63726e-05
FHL2	Four and a half LIM domains 2	-1.41934	-2.57313	1.1538	1.02693e-05
PCSK5	Proprotein convertase subtilisin/kexin type 5	0.757463	-0.39443	1.15189	7.00214e-05
SLC39A12	Solute carrier family 39 (zinc transporter), member 12	-1.88292	-3.0317	1.14877	0.00224865
AEBP1	AE binding protein 1	1.85454	0.707855	1.14668	2.80316e-05
GBP1	Guanylate binding protein 1, interferon-inducible, 67kDa	3.54851	2.40465	1.14386	0.00457174
CPXM2	Carboxypeptidase X (M14 family), member 2	-0.375505	-1.51618	1.14067	0.000106685
FGFBP2	Fibroblast growth factor binding protein 2	2.17042	1.02994	1.14049	0.00281236
PLP2	Proteolipid protein 2 (colonic epithelium-enriched)	1.92756	0.788003	1.13956	8.64358e-07
SPON2	Spondin 2, extracellular matrix protein	1.74244	0.603178	1.13927	0.000366839
FBLN5	Fibulin 5	0.614662	-0.521995	1.13666	0.000124051
PDZK1IP1	PDZK1 interacting protein 1	0.964457	-0.167954	1.13241	3.5975e-07
FLJ46266	FLJ46266 protein	1.13841	0.00862281	1.12979	0.00218082
FKBP5	FK506 binding protein 5	1.57381	0.445364	1.12845	0.000577378
HSPB2	Heat shock 27kDa protein 2	-0.201702	-1.32743	1.12573	0.000214909
CYP1B1	Cytochrome P450, family 1, subfamily B, polypeptide 1	-1.09728	-2.22173	1.12444	0.0040738
EFEMP1	EGF-containing fibulin-like extracellular matrix protein 1	2.31864	1.19446	1.12418	0.000587131
ST8SIA47		2.08035	0.957205	1.12314	1.84125e-06
MGC45438	Hypothetical protein MGC45438	-1.12459	-2.24575	1.12117	6.7824e-05
LOC388335	Similar to RIKEN cDNA A730055C05 gene	0.960117	-0.160364	1.12048	1.30426e-06
EDG2	Endothelial differentiation, lysophosphatidic acid G-protein-coupled receptor, 2	-0.4542	-1.57389	1.11969	0.000406728
CAV2	Caveolin 2	1.31902	0.201433	1.11758	3.6253e-08
GBP3	Guanylate binding protein 3	2.90512	1.78899	1.11613	0.00368268
SLC25A20	Solute carrier family 25 (carnitine/acylcarnitine translocase), member 20	0.866631	-0.248746	1.11538	5.75225e-05
ERP27	Endoplasmic reticulum protein 27 kDa	2.33147	1.21837	1.1131	2.22019e-05
C7orf46	Chromosome 7 open reading frame 46	-0.173658	-1.28512	1.11146	0.00183556
PCSK1	Proprotein convertase subtilisin/kexin type 1	-1.61892	-2.72949	1.11057	0.000509436
KCNE1L	KCNE1-like	0.486721	-0.622997	1.10972	0.000241342
PMP22	Peripheral myelin protein 22	0.688392	-0.420996	1.10939	5.43043e-05
AQP1	Aquaporin 1 (Colton blood group)	2.45753	1.34844	1.10908	0.00143429
ST8SIA407		0.639535	-0.466682	1.10622	2.78891e-06
RPL39L	Ribosomal protein L39-like	-0.710399	-1.81596	1.10556	0.000361019
SH3BGR	SH3 domain binding glutamic acid-rich protein	0.53311	-0.571829	1.10494	2.63316e-05
DPYD	Dihydropyrimidine dehydrogenase	2.32504	1.22134	1.1037	5.11997e-05
MARCO	Macrophage receptor with collagenous structure	0.515719	-0.586217	1.10194	0.002416
PTGS2	Prostaglandin-endoperoxide synthase 2 (prostaglandin G/H synthase and cyclooxygenase)	-0.286573	-1.38689	1.10032	2.80092e-05
IL1RAP	Interleukin 1 receptor accessory protein	2.43708	1.33909	1.09799	0.000530532
COPZ2	Coatomer protein complex, subunit zeta 2	1.10061	0.00390432	1.09671	5.13442e-06
IL7R	Interleukin 7 receptor	0.950518	-0.145242	1.09576	0.000321999
C11orf63	Chromosome 11 open reading frame 63	0.726776	-0.368387	1.09516	1.99089e-06
C7orf29	Chromosome 7 open reading frame 29	-0.417774	-1.50985	1.09207	6.53034e-05
DENND2D	DENN/MADD domain containing 2D	2.25531	1.16452	1.09079	2.92785e-05
LRRC2	Leucine rich repeat containing 2	-1.30279	-2.39248	1.0897	0.00075373
ENPP6	Ectonucleotide pyrophosphatase/phosphodiesterase 6	-0.132308	-1.22166	1.08935	0.00269188
ST8SIA541		0.0967671	-0.991312	1.08808	6.91061e-05
MST150	MSTP150	2.2289	1.14158	1.08732	0.000844257
C14orf50	Chromosome 14 open reading frame 50	0.641599	-0.445041	1.08664	1.75798e-08
SRPX2	Sushi-repeat-containing protein, X-linked 2	3.47813	2.39175	1.08638	0.00181584
GCNT1	Glucosaminyl (N-acetyl) transferase 1, core 2 (beta-1,6-N-acetylglucosaminyltransferase)	0.0870054	-0.999147	1.08615	2.03529e-06
DCDC2	Doublecortin domain containing 2	-0.409811	-1.49571	1.0859	2.76829e-05
F13A1	Coagulation factor XIII, A1 polypeptide	1.56552	0.481559	1.08396	0.00324182
SKAP2	Src kinase associated phosphoprotein 2	-0.0560196	-1.13918	1.08316	2.63603e-06
CEBPD	CCAAT/enhancer binding protein (C/EBP), delta	1.70673	0.623805	1.08293	4.58031e-05
ST8SIA592		-0.323119	-1.40177	1.07865	0.00100834
C15orf48	Chromosome 15 open reading frame 48	2.76809	1.68946	1.07862	0.000236062
ANGPTL4	Angiopoietin-like 4	0.825931	-0.251964	1.0779	0.00382972
CXCL3	Chemokine (C-X-C motif) ligand 3	0.726522	-0.351287	1.07781	1.53058e-05
TOM1L1	Target of myb1 (chicken)-like 1	0.147323	-0.929456	1.07678	0.000175916
RAMP3	Receptor (G protein-coupled) activity modifying protein 3	0.744985	-0.329157	1.07414	5.14245e-07
C1orf88	Chromosome 1 open reading frame 88	1.53172	0.458123	1.0736	0.000241576
RAB32	RAB32, member RAS oncogene family	1.81788	0.745478	1.07241	5.52406e-05
AQP4	Aquaporin 4	0.486829	-0.584755	1.07158	0.010707
ST8SIA412		0.620536	-0.450471	1.07101	0.00019539
IFITM2	Interferon induced transmembrane protein 2 (1-8D)	0.822906	-0.247734	1.07064	6.13007e-05
CD44	CD44 molecule (Indian blood group)	2.71614	1.64578	1.07036	6.81211e-06
COL5A2	Collagen, type V, alpha 2	2.14847	1.07915	1.06932	0.000315477
C9orf135	Chromosome 9 open reading frame 135	0.512651	-0.555344	1.06799	6.28134e-08
C5orf39	Chromosome 5 open reading frame 39	2.86147	1.79492	1.06655	0.00025475
KLHDC9	Kelch domain containing 9	-0.96489	-2.0287	1.06381	0.00563362
SHOX2	Short stature homeobox 2	3.19482	2.13102	1.06381	0.00633029
ARP11	Actin-related Arp11	-2.52242	-3.58589	1.06347	2.35667e-07
VEGFA	Vascular endothelial growth factor A	2.93467	1.87254	1.06213	0.00090291
VAMP5	Vesicle-associated membrane protein 5 (myobrevin)	1.65601	0.594422	1.06159	0.000147616
LCTL	Lactase-like	1.00654	-0.0542405	1.06078	4.38727e-08
SOCS3	Suppressor of cytokine signaling 3	1.52182	0.462549	1.05927	4.81177e-06
SERPING1	Serpin peptidase inhibitor, clade G (C1 inhibitor), member 1, (angioedema, hereditary)	1.23086	0.171693	1.05917	2.04921e-06
PDGFRL	Platelet-derived growth factor receptor-like	0.110026	-0.948464	1.05849	7.70622e-06
AHNAK2	AHNAK nucleoprotein 2	-0.865215	-1.92239	1.05718	3.34569e-07
MSN	Moesin	1.92641	0.871747	1.05466	1.99394e-05
SAMD9L	Sterile alpha motif domain containing 9-like	2.38548	1.33258	1.0529	0.00364171
CH25H	Cholesterol 25-hydroxylase	-1.11291	-2.16469	1.05178	0.0127921
AGR3	Anterior gradient homolog 3 (Xenopus laevis)	1.298	0.247165	1.05084	0.000417281
TNFRSF11B	Tumor necrosis factor receptor superfamily, member 11b (osteoprotegerin)	0.736574	-0.313627	1.0502	0.00056736
PPP1R1C	Protein phosphatase 1, regulatory (inhibitor) subunit 1C	2.08275	1.03504	1.04771	0.00849292
BCL3	B-cell CLL/lymphoma 3	1.40465	0.357183	1.04746	4.055e-08
SLC13A3	Solute carrier family 13 (sodium-dependent dicarboxylate transporter), member 3	-0.950729	-1.99697	1.04624	4.85616e-06
ACOX2	Acyl-Coenzyme A oxidase 2, branched chain	0.811001	-0.235003	1.046	0.00157727
C1orf34	Chromosome 1 open reading frame 34	0.258646	-0.78662	1.04527	2.70509e-05
ANXA2	Annexin A2	2.20493	1.15986	1.04507	1.85359e-06
FAM50B	Family with sequence similarity 50, member B	-1.60602	-2.65108	1.04506	0.000117341
ST8SIA291		1.40207	0.357076	1.04499	1.54586e-06
LINCR	Likely ortholog of mouse lung-inducible Neutralized-related C3HC4 RING domain protein	1.48648	0.443073	1.0434	0.000184546
S100A9	S100 calcium binding protein A9	1.76414	0.721925	1.04222	0.0021798
FLJ22662	Hypothetical protein FLJ22662	1.4982	0.456371	1.04183	0.000121148
TNC	Tenascin C (hexabrachion)	3.23473	2.19383	1.0409	7.93724e-06
ST8SIA784		-1.36306	-2.40381	1.04075	0.00305133
EMILIN2	Elastin microfibril interfacer 2	2.20281	1.1648	1.038	0.0032047
HS3ST3A1	Heparan sulfate (glucosamine) 3-O-sulfotransferase 3A1	1.7046	0.666604	1.03799	0.0141899
WWTR1	WW domain containing transcription regulator 1	1.68924	0.652254	1.03699	1.02435e-05
PDGFA	Platelet-derived growth factor alpha polypeptide	0.521516	-0.514654	1.03617	0.000594835
SHROOM3	Shroom family member 3	0.287185	-0.748798	1.03598	0.00196182
ECHDC2	Enoyl Coenzyme A hydratase domain containing 2	0.403291	-0.632654	1.03594	0.00130434
TRIP4	Thyroid hormone receptor interactor 4	0.544212	-0.491098	1.03531	8.70959e-05
CCL20	Chemokine (C-C motif) ligand 20	0.916198	-0.116668	1.03287	0.000213059
HTATIP2	HIV-1 Tat interactive protein 2, 30kDa	-0.200968	-1.23329	1.03232	8.32755e-05
CTHRC1	Collagen triple helix repeat containing 1	2.01656	0.987673	1.02889	0.00316415
BATF	Basic leucine zipper transcription factor, ATF-like	2.18517	1.15638	1.02879	4.07089e-05
LGALS8	Lectin, galactoside-binding, soluble, 8 (galectin 8)	-1.03986	-2.0685	1.02864	1.90034e-07
MGST1	Microsomal glutathione S-transferase 1	0.0885369	-0.937956	1.02649	0.00244276
PGCP	Plasma glutamate carboxypeptidase	0.673552	-0.352749	1.0263	1.1509e-05
GLT8D4		-0.0203878	-1.04504	1.02466	0.000158171
LAMA2	Laminin, alpha 2 (merosin, congenital muscular dystrophy)	1.62757	0.61029	1.01728	0.000849891
CNN1	Calponin 1, basic, smooth muscle	-0.74116	-1.75767	1.01651	0.000123572
UBXD3	UBX domain containing 3	-0.609002	-1.62489	1.01589	5.17542e-07
CLCF1	Cardiotrophin-like cytokine factor 1	1.39874	0.384289	1.01445	5.21221e-07
HAMP	Hepcidin antimicrobial peptide	1.42413	0.409859	1.01427	0.000287234
ST8SIA582		0.84325	-0.167389	1.01064	0.000122878
LY75	Lymphocyte antigen 75	1.23015	0.220284	1.00987	0.000454672
EFHC2	EF-hand domain (C-terminal) containing 2	0.410271	-0.595402	1.00567	6.09923e-05
MAN1C1	Mannosidase, alpha, class 1C, member 1	0.65812	-0.347221	1.00534	0.000100876
S100A16	S100 calcium binding protein A16	1.62288	0.619486	1.00339	0.00113733
BCL2A1	BCL2-related protein A1	1.78668	0.78509	1.00159	0.00014466
CXCL1	Chemokine (C-X-C motif) ligand 1 (melanoma growth stimulating activity, alpha)	-0.542689	-1.54418	1.00149	0.00239693
GSTM5	Glutathione S-transferase M5	-1.0513	-2.05247	1.00117	5.74105e-07
CA2	Carbonic anhydrase II	0.907844	-0.0908791	0.998723	0.000101357
CXCL2	Chemokine (C-X-C motif) ligand 2	0.59844	-0.398675	0.997115	0.000248834
ECM2	Extracellular matrix protein 2, female organ and adipocyte specific	2.69897	1.70255	0.996419	0.00079257
TNFSF13B	Tumor necrosis factor (ligand) superfamily, member 13b	2.72629	1.73103	0.995262	0.00221269
OTOS	Otospiralin	0.215803	-0.778664	0.994467	0.000131575
PHF11	PHD finger protein 11	0.438306	-0.555518	0.993824	6.41412e-05
ST8SIA825		1.23818	0.246401	0.991783	0.000110996
CAPG	Capping protein (actin filament), gelsolin-like	1.75168	0.761977	0.989706	9.06388e-06
ETV7	Ets variant gene 7 (TEL2 oncogene)	1.40844	0.419529	0.988915	0.000358276
OSBPL3	Oxysterol binding protein-like 3	1.47893	0.49109	0.987839	3.18417e-05
P2RY1	Purinergic receptor P2Y, G-protein coupled, 1	0.968366	-0.0169702	0.985336	0.00474149
ST8SIA45		0.577588	-0.407691	0.985279	0.00703942
CFD	Complement factor D (adipsin)	1.05221	0.0682886	0.983923	0.000255218
PTRF	Polymerase I and transcript release factor	1.28447	0.300893	0.983573	3.54315e-05
COL8A2	Collagen, type VIII, alpha 2	1.08114	0.0977976	0.983339	6.17684e-05
CASP4	Caspase 4, apoptosis-related cysteine peptidase	1.65563	0.672396	0.983235	8.08989e-06
FSTL1	Follistatin-like 1	2.36393	1.38142	0.982509	3.45403e-06
ABCA13	ATP-binding cassette, sub-family A (ABC1), member 13	1.49096	0.513131	0.977826	1.30532e-09
LIPG	Lipase, endothelial	1.95247	0.976563	0.975907	0.000653913
RNASE2	Ribonuclease, RNase A family, 2 (liver, eosinophil-derived neurotoxin)	3.01506	2.0413	0.973752	0.00160816
RDH10	Retinol dehydrogenase 10 (all-trans)	2.09605	1.12472	0.971336	7.73548e-06
ZNF659	Zinc finger protein 659	0.184201	-0.786713	0.970915	0.00732241
PLEKHG1	Pleckstrin homology domain containing, family G (with RhoGef domain) member 1	0.55324	-0.415104	0.968344	0.000160732
PAWR	PRKC, apoptosis, WT1, regulator	0.291331	-0.676954	0.968285	0.000115739
C14orf152	Chromosome 14 open reading frame 152	1.09672	0.130037	0.96668	0.00359091
PLSCR1	Phospholipid scramblase 1	2.1501	1.18365	0.966451	0.000264947
P4HA2	Procollagen-proline, 2-oxoglutarate 4-dioxygenase (proline 4-hydroxylase), alpha polypeptide II	0.157683	-0.808206	0.965889	9.13385e-06
NELL2	NEL-like 2 (chicken)	-2.66215	-3.62788	0.965731	0.0112442
C21orf63	Chromosome 21 open reading frame 63	1.22822	0.262505	0.965713	0.000451416
CD163	CD163 molecule	3.28597	2.32151	0.964457	0.00465198
ACOT6	Acyl-CoA thioesterase 6	-0.347293	-1.3097	0.962411	0.000345053
C10orf107	Chromosome 10 open reading frame 107	-0.10376	-1.06459	0.960826	0.000296299
LATS2	LATS, large tumor suppressor, homolog 2 (Drosophila)	1.01679	0.0563527	0.96044	3.57563e-06
ST8SIA8		1.24519	0.285512	0.959677	0.00698556
CYR61	Cysteine-rich, angiogenic inducer, 61	1.60009	0.640705	0.959389	0.00057953
CD109	CD109 molecule	1.39599	0.437235	0.958759	1.15696e-05
CCL7	Chemokine (C-C motif) ligand 7	1.30461	0.346932	0.957679	0.00103005
ST8SIA464		0.424891	-0.532572	0.957463	0.00337362
LOC221091	Similar to hypothetical protein	1.9207	0.963497	0.9572	0.00333023
FZD7	Frizzled homolog 7 (Drosophila)	2.09157	1.13587	0.9557	0.00628371
S100A10	S100 calcium binding protein A10	2.14385	1.18852	0.955338	0.000339312
C20orf26	Chromosome 20 open reading frame 26	1.49397	0.538884	0.955087	0.00169139
CADPS2	Ca2+-dependent activator protein for secretion 2	-1.68297	-2.63506	0.952087	0.000320955
PYGL	Phosphorylase, glycogen; liver (Hers disease, glycogen storage disease type VI)	2.39652	1.44599	0.950532	3.31854e-05
UBD	Ubiquitin D	2.88376	1.93374	0.950018	0.000936576
MAP1LC3C	Microtubule-associated protein 1 light chain 3 gamma	1.08135	0.131632	0.949715	1.55283e-07
BIC		2.24474	1.2952	0.949544	0.000123446
DHX58	DEXH (Asp-Glu-X-His) box polypeptide 58	0.104571	-0.843589	0.94816	0.00118788
EGF	Epidermal growth factor (beta-urogastrone)	0.724908	-0.223156	0.948064	1.39314e-05
GDPD2	Glycerophosphodiester phosphodiesterase domain containing 2	0.44751	-0.499563	0.947073	0.000329961
COP1	Caspase-1 dominant-negative inhibitor pseudo-ICE	1.32174	0.375453	0.946284	6.55171e-06
LEPREL1	Leprecan-like 1	1.19639	0.250394	0.945998	0.000118576
OPLAH	5-oxoprolinase (ATP-hydrolysing)	-0.403363	-1.34846	0.945099	0.00233366
WISP1	WNT1 inducible signaling pathway protein 1	1.28843	0.343412	0.945015	0.00856908
TPM2	Tropomyosin 2 (beta)	1.44337	0.498453	0.944914	5.14342e-07
CTSZ	Cathepsin Z	0.660238	-0.284209	0.944446	9.34853e-05
HIG2	Hypoxia-inducible protein 2	2.13778	1.19436	0.94342	4.21505e-05
LOC283152	Hypothetical protein LOC283152	0.822665	-0.12001	0.942675	3.87571e-08
RASGEF1A	RasGEF domain family, member 1A	-2.82936	-3.77137	0.942017	3.96684e-05
CYP2J2	Cytochrome P450, family 2, subfamily J, polypeptide 2	-0.522596	-1.46454	0.94194	0.0092844
ICAM1	Intercellular adhesion molecule 1 (CD54), human rhinovirus receptor	0.932872	-0.00891303	0.941785	1.86281e-06
CD52	CD52 molecule	-0.210726	-1.15226	0.941536	0.00036168
C6orf165	Chromosome 6 open reading frame 165	0.230132	-0.708905	0.939037	0.00100199
CD58	CD58 molecule	2.1354	1.19666	0.938745	0.00103031
SH2D4A	SH2 domain containing 4A	1.29381	0.355322	0.938491	7.50947e-05
PIR	Pirin (iron-binding nuclear protein)	-0.0819808	-1.01994	0.937962	0.0027618
C20orf198	Chromosome 20 open reading frame 198	0.418512	-0.518942	0.937454	0.000499218
VCAM1	Vascular cell adhesion molecule 1	2.28704	1.35078	0.936268	0.00701303
AKAP12	A kinase (PRKA) anchor protein (gravin) 12	-0.374448	-1.30975	0.935302	0.000487154
IL13RA1	Interleukin 13 receptor, alpha 1	1.3214	0.38746	0.933937	2.31716e-06
N6AMT2	N-6 adenine-specific DNA methyltransferase 2 (putative)	0.0699775	-0.862892	0.932869	0.000404693
FER1L3	Fer-1-like 3, myoferlin (C. elegans)	1.83671	0.90489	0.931816	3.60228e-06
GSX2	GS homeobox 2	1.43761	0.507157	0.930451	0.00051435
ARSF	Arylsulfatase F	0.79964	-0.129604	0.929244	0.000762964
FKBP9	FK506 binding protein 9, 63 kDa	1.53426	0.605807	0.928451	2.26562e-05
CRB2	Crumbs homolog 2 (Drosophila)	1.1727	0.245111	0.927588	0.000111288
FKBP9L	FK506 binding protein 9-like	1.27696	0.349464	0.927491	1.70219e-05
SDC2	Syndecan 2	0.389725	-0.537376	0.927101	0.000130943
HEBP1	Heme binding protein 1	0.0803405	-0.844729	0.92507	0.000228808
SPOCD1	SPOC domain containing 1	3.87791	2.95343	0.924485	0.00993415
HSPA6	Heat shock 70kDa protein 6 (HSP70B')	2.76729	1.84464	0.922648	0.00065099
C9orf64	Chromosome 9 open reading frame 64	0.953229	0.0318846	0.921344	1.40638e-05
LOC441054	Hypothetical protein LOC441054	2.72979	1.80898	0.920813	0.0011776
FRZB	Frizzled-related protein	0.134864	-0.785002	0.919867	1.19166e-06
CXCR4	Chemokine (C-X-C motif) receptor 4	2.54884	1.63002	0.918825	4.31772e-05
PSRC1	Proline/serine-rich coiled-coil 1	1.14018	0.222355	0.917828	3.06601e-05
EPHX2	Epoxide hydrolase 2, cytoplasmic	-0.391515	-1.30749	0.91597	0.0081803
CCR7	Chemokine (C-C motif) receptor 7	1.38216	0.4674	0.91476	2.80738e-05
RRAD	Ras-related associated with diabetes	-0.00113508	-0.91527	0.914135	7.0154e-07
DOK5	Docking protein 5	1.02191	0.108993	0.912913	0.00138941
EVC2	Ellis van Creveld syndrome 2 (limbin)	1.60137	0.689511	0.91186	1.52448e-05
ST8SIA826		1.22004	0.308198	0.911844	1.08091e-05
GRB14	Growth factor receptor-bound protein 14	0.0887574	-0.822768	0.911525	0.00412424
ACAA2	Acetyl-Coenzyme A acyltransferase 2 (mitochondrial 3-oxoacyl-Coenzyme A thiolase)	0.369016	-0.542082	0.911098	9.93146e-06
ADAM12	ADAM metallopeptidase domain 12 (meltrin alpha)	2.04336	1.13275	0.910606	1.40616e-05
C3	Complement component 3	1.59003	0.6821	0.907928	0.00224879
ISG20	Interferon stimulated exonuclease gene 20kDa	1.67701	0.769344	0.907665	2.29879e-05
CCDC8	Coiled-coil domain containing 8	0.692458	-0.21486	0.907319	0.00379748
RAB42	RAB42, member RAS oncogene family	2.54052	1.63368	0.906837	0.000190106
IL1R2	Interleukin 1 receptor, type II	2.11291	1.2061	0.906806	0.00459422
GRB10	Growth factor receptor-bound protein 10	-0.481674	-1.38798	0.906306	0.000638674
NAPSA	Napsin A aspartic peptidase	2.23289	1.32893	0.903965	0.000227697
WDR78	WD repeat domain 78	1.89989	0.996581	0.903313	0.000565296
AOX1	Aldehyde oxidase 1	0.404227	-0.499066	0.903293	9.54495e-07
ALPK2	Alpha-kinase 2	1.21631	0.313846	0.902463	0.00876402
SQRDL	Sulfide quinone reductase-like (yeast)	1.6921	0.790057	0.902043	0.000328547
ESPNL	Espin-like	0.260268	-0.639883	0.900151	7.9058e-05
SEC24D	SEC24 related gene family, member D (S. cerevisiae)	0.884345	-0.0152265	0.899572	1.60054e-06
LDHA	Lactate dehydrogenase A	0.472987	-0.425551	0.898537	6.39302e-05
LAMB1	Laminin, beta 1	1.82627	0.928537	0.897736	0.00152733
MFAP4	Microfibrillar-associated protein 4	1.16172	0.265037	0.896682	0.000484908
VNN2	Vanin 2	1.73491	0.838321	0.896591	0.000279572
ACTN1	Actinin, alpha 1	0.697464	-0.198293	0.895758	7.50717e-05
ST8SIA846		-0.598949	-1.49379	0.894841	0.002493
SPAG4	Sperm associated antigen 4	0.758774	-0.135149	0.893923	5.91889e-06
SELM	Selenoprotein M	-1.4098	-2.3032	0.893403	0.000290013
ANXA4	Annexin A4	1.0104	0.117635	0.892769	5.60604e-06
DRAM	Damage-regulated autophagy modulator	1.90416	1.01235	0.89181	2.97269e-05
ST8SIA903		2.08359	1.19223	0.891362	0.00577461
ASPA	Aspartoacylase (Canavan disease)	-1.5803	-2.47073	0.890421	0.0129179
GDF15	Growth differentiation factor 15	1.94225	1.05214	0.890111	0.00638891
SLC25A24	Solute carrier family 25 (mitochondrial carrier; phosphate carrier), member 24	1.05059	0.161581	0.889009	0.0003728
IFI30	Interferon, gamma-inducible protein 30	3.14318	2.25522	0.887964	0.000348978
TNFRSF1A	Tumor necrosis factor receptor superfamily, member 1A	1.73924	0.851991	0.88725	9.30659e-05
LRRC16	Leucine rich repeat containing 16	-0.800004	-1.68504	0.885037	0.00654028
SERPINB1	Serpin peptidase inhibitor, clade B (ovalbumin), member 1	1.47541	0.590617	0.884797	5.25831e-05
TSLP	Thymic stromal lymphopoietin	1.16971	0.284943	0.884764	0.00693507
LAMP3	Lysosomal-associated membrane protein 3	2.26226	1.37763	0.884626	0.000102479
SLC16A3	Solute carrier family 16, member 3 (monocarboxylic acid transporter 4)	1.82732	0.943002	0.88432	2.19943e-06
C9orf95	Chromosome 9 open reading frame 95	-0.0992415	-0.982654	0.883413	3.78827e-05
NPC2	Niemann-Pick disease, type C2	1.78321	0.901607	0.881604	1.08158e-05
RDM1	RAD52 motif 1	0.145607	-0.733297	0.878904	0.00077146
C21orf7	Chromosome 21 open reading frame 7	2.44034	1.56186	0.878481	0.00269236
CCDC125	Coiled-coil domain containing 125	0.911552	0.0348955	0.876656	2.82228e-05
C13orf18	Chromosome 13 open reading frame 18	0.971798	0.0965604	0.875237	0.00332435
LY96	Lymphocyte antigen 96	1.35321	0.478193	0.875021	0.00132005
KIAA0495	KIAA0495	0.752688	-0.121762	0.87445	0.000294461
RTP4	Receptor (chemosensory) transporter protein 4	2.09159	1.21754	0.874051	0.00442528
RSPH1	Radial spoke head 1 homolog (Chlamydomonas)	-0.936897	-1.80942	0.872521	0.00257408
ANKRD45	Ankyrin repeat domain 45	-0.32455	-1.19702	0.872465	0.00112081
FAM26F	Family with sequence similarity 26, member F	1.10676	0.235123	0.871636	0.00334929
WDR63	WD repeat domain 63	1.39708	0.526905	0.870174	0.000688424
HERC5	Hect domain and RLD 5	2.00814	1.13815	0.869991	0.0067435
CHIT1	Chitinase 1 (chitotriosidase)	1.13279	0.263813	0.868974	0.000249125
SAT1	Spermidine/spermine N1-acetyltransferase 1	1.61305	0.745065	0.867989	6.04552e-05
ALOX5AP	Arachidonate 5-lipoxygenase-activating protein	1.67963	0.812783	0.866845	0.00437683
CAST	Calpastatin	1.04282	0.176744	0.866072	4.98236e-07
PDE1C	Phosphodiesterase 1C, calmodulin-dependent 70kDa	-0.497782	-1.36368	0.865894	3.19394e-05
BCAT1	Branched chain aminotransferase 1, cytosolic	1.51658	0.652433	0.864146	0.00585065
LOC541471	Hypothetical LOC541471	0.75223	-0.111319	0.863549	0.000114176
FUCA2	Fucosidase, alpha-L- 2, plasma	1.0787	0.215175	0.863528	4.16424e-06
EMP1	Epithelial membrane protein 1	3.01571	2.15435	0.861363	0.0031635
IL1A	Interleukin 1, alpha	1.02482	0.163476	0.861346	0.00151868
ST8SIA708		1.16535	0.3042	0.86115	0.000246163
ST8SIA552		3.00028	2.13959	0.86069	0.000889305
C6orf141	Chromosome 6 open reading frame 141	0.400315	-0.460002	0.860318	0.000352988
S100A4	S100 calcium binding protein A4	1.69958	0.839286	0.860298	0.000137936
FLJ31568	Zinc finger, DHHC-type containing 8 pseudogene	-2.25846	-3.11875	0.860289	0.0014167
AIM1	Absent in melanoma 1	1.72782	0.868388	0.85943	0.00141417
CFHR3		0.469719	-0.389191	0.85891	0.00248302
CASP1	Caspase 1, apoptosis-related cysteine peptidase (interleukin 1, beta, convertase)	2.40785	1.5492	0.858649	0.0025122
IQCG	IQ motif containing G	1.12214	0.263742	0.858402	0.000171986
MGC24103	Hypothetical protein MGC24103	1.02823	0.169844	0.858385	0.000522194
ROPN1L	Ropporin 1-like	-0.735222	-1.59327	0.858051	0.00383274
IL7	Interleukin 7	2.59668	1.73965	0.857031	0.00400273
TNFRSF12A	Tumor necrosis factor receptor superfamily, member 12A	2.52492	1.66925	0.855662	0.000426095
EBI2	Epstein-Barr virus induced gene 2 (lymphocyte-specific G protein-coupled receptor)	1.16142	0.306307	0.85511	0.00331523
AREG	Amphiregulin (schwannoma-derived growth factor)	0.388686	-0.466422	0.855108	0.00780007
TNFAIP8	Tumor necrosis factor, alpha-induced protein 8	1.52027	0.666158	0.85411	7.5092e-05
ALDH1A1	Aldehyde dehydrogenase 1 family, member A1	-0.894993	-1.74785	0.852853	0.00477464
NEK6	NIMA (never in mitosis gene a)-related kinase 6	1.07838	0.226338	0.852039	0.000239598
RPESP	RPE-spondin	0.923694	0.0717655	0.851929	0.0109954
MX1	Myxovirus (influenza virus) resistance 1, interferon-inducible protein p78 (mouse)	0.481603	-0.369537	0.85114	0.00606352
NMI	N-myc (and STAT) interactor	2.21659	1.3659	0.850691	0.000820562
CSRP2	Cysteine and glycine-rich protein 2	3.26464	2.41401	0.850633	0.000686494
RGS2	Regulator of G-protein signaling 2, 24kDa	0.241254	-0.608461	0.849715	0.000807262
CRYGD	Crystallin, gamma D	-0.918847	-1.76704	0.848194	0.00361631
MXRA5	Matrix-remodelling associated 5	2.04423	1.19656	0.847667	0.00499971
BDKRB2	Bradykinin receptor B2	-0.0568099	-0.903679	0.846869	2.59006e-05
RBKS		-0.134515	-0.981211	0.846696	4.67592e-05
SNAI2	Snail homolog 2 (Drosophila)	1.91822	1.0719	0.846323	0.00116599
MRCL3	Myosin regulatory light chain MRCL3	1.43507	0.589393	0.845675	3.21076e-07
GBP5	Guanylate binding protein 5	2.5957	1.75019	0.845511	0.0122659
LILRB3	Leukocyte immunoglobulin-like receptor, subfamily B (with TM and ITIM domains), member 3	2.08331	1.23793	0.845375	4.88134e-05
NCF2	Neutrophil cytosolic factor 2 (65kDa, chronic granulomatous disease, autosomal 2)	1.75849	0.913474	0.845012	0.000553138
FAM79B	Family with sequence similarity 79, member B	1.40285	0.557985	0.844867	8.12284e-09
ADFP	Adipose differentiation-related protein	1.34635	0.502987	0.843366	0.000314121
VLDLR	Very low density lipoprotein receptor	-0.333193	-1.17621	0.843016	0.00111041
DNAH11	Dynein, axonemal, heavy chain 11	0.891992	0.0496223	0.842369	2.31875e-05
CD302	CD302 molecule	1.47179	0.629611	0.842181	0.000516256
WNT16	Wingless-type MMTV integration site family, member 16	-1.31015	-2.15168	0.841537	0.00371961
CFH	Complement factor H	0.875202	0.0348568	0.840345	0.00171185
SERPINA5	Serpin peptidase inhibitor, clade A (alpha-1 antiproteinase, antitrypsin), member 5	1.25011	0.410381	0.839724	0.000573967
FLJ11151	Hypothetical protein FLJ11151	-0.247581	-1.08603	0.838454	4.7142e-05
FAM20A	Family with sequence similarity 20, member A	1.18412	0.347572	0.836551	0.000203103
AADACL1	Arylacetamide deacetylase-like 1	-2.38322	-3.21906	0.835835	3.34251e-05
CAPS	Calcyphosine	1.46004	0.625807	0.834232	0.00720577
GNG12	Guanine nucleotide binding protein (G protein), gamma 12	1.87336	1.03947	0.833887	0.00421196
DYRK3	Dual-specificity tyrosine-(Y)-phosphorylation regulated kinase 3	1.18323	0.349496	0.833737	6.91958e-06
CCL26	Chemokine (C-C motif) ligand 26	1.20428	0.370549	0.833728	4.83217e-06
PPCS	Phosphopantothenoylcysteine synthetase	-0.0867633	-0.920091	0.833328	6.10516e-05
PAMCI	Peptidylglycine alpha-amidating monooxygenase COOH-terminal interactor	0.629908	-0.20297	0.832878	0.000523755
ITGA6	Integrin, alpha 6	0.993806	0.161061	0.832745	3.89785e-05
SPAG17	Sperm associated antigen 17	0.703639	-0.129059	0.832698	6.65839e-05
PROK2	Prokineticin 2	0.213031	-0.619488	0.832519	0.000110415
PLS3	Plastin 3 (T isoform)	0.419359	-0.412475	0.831835	0.00347455
FAM46B	Family with sequence similarity 46, member B	0.869768	0.0383575	0.831411	5.94217e-06
ARHGAP18	Rho GTPase activating protein 18	1.91927	1.08842	0.830853	0.000117333
SERPINE1	Serpin peptidase inhibitor, clade E (nexin, plasminogen activator inhibitor type 1), member 1	1.71363	0.883399	0.830231	0.0016606
CXCL10	Chemokine (C-X-C motif) ligand 10	2.49435	1.66423	0.830119	0.0107535
C8orf4	Chromosome 8 open reading frame 4	2.31616	1.48648	0.829678	0.00458745
SPINK2	Serine peptidase inhibitor, Kazal type 2 (acrosin-trypsin inhibitor)	-1.07222	-1.90076	0.828537	0.00546462
CD72	CD72 molecule	1.81291	0.984402	0.828511	8.38996e-06
PLTP	Phospholipid transfer protein	1.99044	1.16196	0.828479	0.00139574
METTL7B	Methyltransferase like 7B	2.43688	1.60905	0.82783	0.00948968
CST6	Cystatin E/M	-0.700894	-1.52468	0.823783	0.000845186
DNAJA4	DnaJ (Hsp40) homolog, subfamily A, member 4	-2.90808	-3.73177	0.823684	0.00488222
TRIM22	Tripartite motif-containing 22	2.16508	1.34145	0.823629	0.00835483
CCL5	Chemokine (C-C motif) ligand 5	0.929108	0.106311	0.822797	4.13047e-06
GZMK	Granzyme K (granzyme 3; tryptase II)	1.37817	0.555708	0.822467	0.000506716
HES1	Hairy and enhancer of split 1, (Drosophila)	1.10702	0.285453	0.821567	0.000404912
NDRG1	N-myc downstream regulated gene 1	0.225453	-0.596021	0.821474	4.66127e-05
CLIC1	Chloride intracellular channel 1	1.73285	0.911533	0.821317	0.000104548
C9orf89	Chromosome 9 open reading frame 89	0.0446389	-0.775277	0.819916	0.000123328
COL3A1	Collagen, type III, alpha 1 (Ehlers-Danlos syndrome type IV, autosomal dominant)	3.28113	2.46273	0.818396	0.0070206
MDK	Midkine (neurite growth-promoting factor 2)	2.06687	1.24857	0.818297	0.00262099
WFDC2	WAP four-disulfide core domain 2	-0.241858	-1.05544	0.813582	0.000120656
BST1	Bone marrow stromal cell antigen 1	1.99777	1.18479	0.812985	9.1937e-05
VCX3A	Variable charge, X-linked 3A	0.0305905	-0.782323	0.812913	0.00118417
FAM90A1	Family with sequence similarity 90, member A1	0.24773	-0.564898	0.812628	0.000975686
FAM110C	Family with sequence similarity 110, member C	-0.367491	-1.17975	0.812262	1.02583e-05
C5orf29	Chromosome 5 open reading frame 29	2.16518	1.35335	0.811821	0.00446065
MXRA8	Matrix-remodelling associated 8	1.3501	0.539718	0.810386	6.1439e-05
GALNT5	UDP-N-acetyl-alpha-D-galactosamine:polypeptide N-acetylgalactosaminyltransferase 5 (GalNAc-T5)	0.810824	0.000592786	0.810231	0.00166479
HSPB7	Heat shock 27kDa protein family, member 7 (cardiovascular)	0.819214	0.009218	0.809996	0.000178815
COLEC12	Collectin sub-family member 12	-0.22313	-1.03124	0.808115	0.00271442
NFE2L3	Nuclear factor (erythroid-derived 2)-like 3	1.93711	1.12918	0.807921	0.000927523
AMPD3	Adenosine monophosphate deaminase (isoform E)	-0.000168986	-0.80762	0.807451	0.000196915
KLRB1	Killer cell lectin-like receptor subfamily B, member 1	0.933059	0.125987	0.807072	0.0010479
C10orf11	Chromosome 10 open reading frame 11	0.78777	-0.0180818	0.805852	0.000130686
CCR5	Chemokine (C-C motif) receptor 5	1.34886	0.543385	0.805472	0.00014349
FCGBP	Fc fragment of IgG binding protein	3.37468	2.56938	0.805295	0.00155477
ANXA13	Annexin A13	1.05004	0.246253	0.803789	1.4849e-05
C14orf169	Chromosome 14 open reading frame 169	-1.06554	-1.86757	0.802033	7.52819e-05
BHLHB3	Basic helix-loop-helix domain containing, class B, 3	-0.158328	-0.960207	0.801879	0.00995542
HPS1	Hermansky-Pudlak syndrome 1	-0.544694	-1.34573	0.801032	1.38925e-07
DUSP23	Dual specificity phosphatase 23	-0.101209	-0.901747	0.800538	0.000466211
BHLHB2	Basic helix-loop-helix domain containing, class B, 2	-0.668379	-1.4686	0.800225	4.39461e-06
PSCDBP	Pleckstrin homology, Sec7 and coiled-coil domains, binding protein	1.51666	0.717072	0.799589	7.60595e-05
CD48	CD48 molecule	2.07272	1.27364	0.799088	0.00923477
GADD45B	Growth arrest and DNA-damage-inducible, beta	1.28961	0.490734	0.798879	0.00101542
ARRDC4	Arrestin domain containing 4	1.35593	0.557083	0.798845	0.000833343
ST8SIA187		0.182597	-0.616132	0.798729	0.00101259
REG1A	Regenerating islet-derived 1 alpha (pancreatic stone protein, pancreatic thread protein)	0.77891	-0.019294	0.798204	9.22055e-05
SOSTDC1	Sclerostin domain containing 1	-3.847	-4.64457	0.797574	0.0020124
CPVL	Carboxypeptidase, vitellogenic-like	2.282	1.48553	0.796475	0.00261417
CYB5R1	Cytochrome b5 reductase 1	0.0946823	-0.700803	0.795485	0.000191347
ST8SIA580		1.17168	0.376283	0.795392	0.000686113
COL16A1	Collagen, type XVI, alpha 1	-0.0412406	-0.836621	0.79538	0.0114942
HPS3	Hermansky-Pudlak syndrome 3	1.73753	0.942655	0.794871	0.000532178
ST8SIA795		2.38532	1.59416	0.791168	0.0100398
CSRP1	Cysteine and glycine-rich protein 1	-0.315933	-1.10651	0.790576	0.00723552
CALU	Calumenin	1.70544	0.915122	0.790316	6.12132e-07
GZMH	Granzyme H (cathepsin G-like 2, protein h-CCPX)	1.00255	0.212912	0.789639	5.46965e-05
PARP12	Poly (ADP-ribose) polymerase family, member 12	1.58546	0.796119	0.789341	0.00129279
CLDN1	Claudin 1	-0.307351	-1.09658	0.789234	0.000107666
MEST	Mesoderm specific transcript homolog (mouse)	2.5889	1.80109	0.787803	0.014593
C6orf150	Chromosome 6 open reading frame 150	0.922967	0.135463	0.787504	0.000201056
ST8SIA292		1.53878	0.752046	0.786739	0.000734356
ECOP	EGFR-coamplified and overexpressed protein	1.10538	0.320108	0.785275	0.00445754
FLJ20273		1.8796	1.09466	0.784943	0.000127629
PGAM2	Phosphoglycerate mutase 2 (muscle)	1.36067	0.575823	0.784848	0.00618618
ST8SIA9		-1.25682	-2.04136	0.784535	0.00266797
EPS8L2	EPS8-like 2	0.308293	-0.476235	0.784527	2.51917e-05
RORB	RAR-related orphan receptor B	-0.579741	-1.36384	0.784095	0.00824832
TNFRSF14	Tumor necrosis factor receptor superfamily, member 14 (herpesvirus entry mediator)	1.02035	0.236746	0.783605	0.000150324
OSMR	Oncostatin M receptor	1.34815	0.564757	0.783391	0.000128894
PHLDA3	Pleckstrin homology-like domain, family A, member 3	0.520945	-0.262138	0.783083	0.00262131
GPR84	G protein-coupled receptor 84	1.76033	0.977296	0.783037	0.00236424
HVCN1	Hydrogen voltage-gated channel 1	0.808388	0.0255367	0.782851	0.000551416
C1orf54	Chromosome 1 open reading frame 54	1.20687	0.424949	0.781917	0.000514066
CCR2	Chemokine (C-C motif) receptor 2	0.849255	0.0678196	0.781435	0.000123406
CLEC4D	C-type lectin domain family 4, member D	0.952804	0.171766	0.781038	0.000162987
NIPSNAP3A	Nipsnap homolog 3A (C. elegans)	-0.0147143	-0.794842	0.780128	0.000416555
MT1G	Metallothionein 1G	0.355785	-0.42385	0.779635	0.00281463
TREM1	Triggering receptor expressed on myeloid cells 1	2.5084	1.73072	0.777678	0.00654342
CAV1	Caveolin 1, caveolae protein, 22kDa	2.00012	1.22338	0.776738	0.00564606
MT1H	Metallothionein 1H	0.921845	0.145527	0.776318	0.00763448
LRRC34	Leucine rich repeat containing 34	0.453868	-0.3224	0.776268	0.000492304
PLAU	Plasminogen activator, urokinase	2.61919	1.84374	0.775449	0.0111233
ST6GALNAC5	ST6 (alpha-N-acetyl-neuraminyl-2,3-beta-galactosyl-1,3)-N-acetylgalactosaminide alpha-2,6-sialyltransferase 5	-3.59711	-4.37056	0.773449	0.0085398
ARG1	Arginase, liver	-0.246706	-1.01879	0.772081	0.000516741
HIST1H1A	Histone cluster 1, H1a	-0.446701	-1.2185	0.7718	4.77268e-06
PIH1D2	PIH1 domain containing 2	1.63853	0.867011	0.771517	0.00011996
F11R	F11 receptor	1.13648	0.365441	0.771034	1.8291e-06
RARRES3	Retinoic acid receptor responder (tazarotene induced) 3	1.32285	0.551884	0.770969	0.00109121
CDO1	Cysteine dioxygenase, type I	0.127695	-0.642848	0.770543	0.0100458
SNAI1	Snail homolog 1 (Drosophila)	0.799396	0.0290178	0.770379	0.00247631
FAM114A1	Family with sequence similarity 114, member A1	1.40373	0.633478	0.770251	4.578e-06
BTBD14A	BTB (POZ) domain containing 14A	0.83953	0.0702989	0.769231	1.80967e-05
PLOD2	Procollagen-lysine, 2-oxoglutarate 5-dioxygenase 2	1.81018	1.04119	0.768992	6.70265e-05
GCA	Grancalcin, EF-hand calcium binding protein	0.260498	-0.507116	0.767614	0.000205388
ANGPT1	Angiopoietin 1	0.956958	0.189886	0.767072	3.31379e-05
CCDC65	Coiled-coil domain containing 65	0.234054	-0.532868	0.766922	0.000258813
NEXN	Nexilin (F actin binding protein)	1.67807	0.911224	0.766844	0.000783716
ANGPTL1	Angiopoietin-like 1	0.384768	-0.380891	0.765659	0.0106993
ZFP36	Zinc finger protein 36, C3H type, homolog (mouse)	1.22372	0.458557	0.765163	0.00422928
FBP1	Fructose-1,6-bisphosphatase 1	1.28369	0.518656	0.765032	0.000294555
SAA4	Serum amyloid A4, constitutive	0.480497	-0.284245	0.764743	1.37188e-05
ICAM3	Intercellular adhesion molecule 3	0.692872	-0.0718513	0.764723	4.23149e-05
COL5A1	Collagen, type V, alpha 1	1.2448	0.481229	0.763574	0.00117124
C10orf114	Chromosome 10 open reading frame 114	-0.49003	-1.25337	0.763339	0.00102499
IRAK3	Interleukin-1 receptor-associated kinase 3	0.928948	0.165805	0.763143	7.88377e-05
CCL13	Chemokine (C-C motif) ligand 13	0.697942	-0.0648837	0.762825	0.00588822
LGALS7	Lectin, galactoside-binding, soluble, 7 (galectin 7)	0.963724	0.201197	0.762526	0.000257615
OGFRL1	Opioid growth factor receptor-like 1	1.41111	0.648697	0.762415	7.08299e-05
NAT1	N-acetyltransferase 1 (arylamine N-acetyltransferase)	1.45827	0.695923	0.762345	3.49584e-06
MFAP5	Microfibrillar associated protein 5	0.580629	-0.181505	0.762134	7.29114e-06
OSM	Oncostatin M	1.29564	0.535245	0.760395	0.00732272
PROCR	Protein C receptor, endothelial (EPCR)	1.74209	0.981886	0.760207	4.89274e-05
INCA	Inhibitory caspase recruitment domain (CARD) protein	1.49541	0.735254	0.760155	1.43909e-05
SLC39A8	Solute carrier family 39 (zinc transporter), member 8	1.21593	0.45594	0.759994	8.46459e-06
KIAA1199	KIAA1199	-0.990269	-1.75023	0.759961	0.00166364
SLC44A3	Solute carrier family 44, member 3	0.463006	-0.296252	0.759258	0.00810553
OSTF1	Osteoclast stimulating factor 1	-0.149497	-0.907777	0.758281	4.36723e-05
SLC31A2	Solute carrier family 31 (copper transporters), member 2	-0.454914	-1.21237	0.757458	0.00305179
FAM26B	Family with sequence similarity 26, member B	0.761192	0.00454534	0.756647	0.000847187
ST8SIA350		1.13565	0.379046	0.7566	6.07148e-05
CDCP1	CUB domain containing protein 1	1.4098	0.653504	0.756301	2.84747e-07
C20orf23	Chromosome 20 open reading frame 23	-0.589531	-1.34566	0.756133	0.000339219
PRO0132	PRO0132 protein	1.55656	0.801065	0.755496	0.000395377
TRIM59	Tripartite motif-containing 59	-0.368392	-1.1235	0.75511	0.000143831
ADAMTS1	ADAM metallopeptidase with thrombospondin type 1 motif, 1	0.673693	-0.0786169	0.75231	0.00115731
MT2A	Metallothionein 2A	0.590639	-0.161631	0.75227	0.00794553
TPST1	Tyrosylprotein sulfotransferase 1	1.41562	0.663407	0.752214	0.000209785
LTB4DH	Leukotriene B4 12-hydroxydehydrogenase	0.0558136	-0.695543	0.751357	4.53804e-05
CLEC5A	C-type lectin domain family 5, member A	2.08598	1.33599	0.74999	0.00756906
SSH3	Slingshot homolog 3 (Drosophila)	0.27932	-0.469914	0.749234	0.000122778
RNF135	Ring finger protein 135	1.43469	0.686089	0.748604	1.12298e-05
CLU	Clusterin	0.481695	-0.266789	0.748485	0.00128716
ST8SIA680		1.72655	0.978249	0.748304	0.00282307
ST8SIA347		0.287167	-0.459766	0.746934	6.12493e-07
GEM	GTP binding protein overexpressed in skeletal muscle	2.17299	1.42624	0.746755	0.000992081
MT1B	Metallothionein 1B	1.16188	0.417159	0.744722	0.00812188
TRIP6	Thyroid hormone receptor interactor 6	1.25588	0.511781	0.744097	3.97334e-05
FPRL1	Formyl peptide receptor-like 1	1.43975	0.695725	0.744027	0.000913553
SLC22A15	Solute carrier family 22 (organic cation transporter), member 15	-1.12012	-1.86395	0.743832	0.00301844
APOBEC3G	Apolipoprotein B mRNA editing enzyme, catalytic polypeptide-like 3G	1.527	0.783464	0.743535	0.00222555
CASP5	Caspase 5, apoptosis-related cysteine peptidase	1.37203	0.628575	0.743452	3.21703e-05
MR1	Major histocompatibility complex, class I-related	1.67803	0.936518	0.741511	4.88477e-05
ZNF217	Zinc finger protein 217	2.10824	1.36821	0.740026	0.000413272
XKR8	XK, Kell blood group complex subunit-related family, member 8	0.57291	-0.166543	0.739453	0.00109411
DES	Desmin	0.844819	0.105803	0.739016	0.000269478
C8orf34	Chromosome 8 open reading frame 34	-0.502832	-1.24156	0.738726	0.00370023
FLJ11286	Hypothetical protein FLJ11286	0.31681	-0.421881	0.738691	0.000575551
IL18RAP	Interleukin 18 receptor accessory protein	1.07274	0.335294	0.737446	0.00257579
S100A6	S100 calcium binding protein A6	1.74996	1.01294	0.737025	0.000847803
ST8SIA678		1.80178	1.065	0.736784	0.00277106
FBXO32	F-box protein 32	1.61966	0.883098	0.736561	0.00474004
FKBP11	FK506 binding protein 11, 19 kDa	1.13957	0.403173	0.736393	0.000201037
DHRS3	Dehydrogenase/reductase (SDR family) member 3	0.626486	-0.109414	0.7359	0.00275536
MAPK4	Mitogen-activated protein kinase 4	0.0907823	-0.645059	0.735842	0.00971283
TRIM6-TRIM34		1.66508	0.930727	0.734354	0.0001702
CA8	Carbonic anhydrase VIII	-0.404595	-1.13798	0.733385	0.0138106
SRGN	Serglycin	1.2942	0.560918	0.733283	0.00203892
GLRX	Glutaredoxin (thioltransferase)	0.308398	-0.424492	0.73289	0.00061135
ITGA1		2.49117	1.75984	0.731339	0.00166384
CROT	Carnitine O-octanoyltransferase	1.87118	1.14003	0.731153	0.000519977
TSPAN2	Tetraspanin 2	-0.355885	-1.08631	0.730428	0.000794913
MEGF10	Multiple EGF-like-domains 10	-0.20575	-0.935903	0.730153	0.000905599
IFITM3	Interferon induced transmembrane protein 3 (1-8U)	0.692182	-0.0362255	0.728407	9.34189e-05
NUDT16	Nudix (nucleoside diphosphate linked moiety X)-type motif 16	-0.495728	-1.22394	0.728213	0.00049626
NTNG1	Netrin G1	0.344429	-0.382963	0.727391	0.000371855
C15orf26	Chromosome 15 open reading frame 26	0.310976	-0.416032	0.727009	0.00809753
ARL4A	ADP-ribosylation factor-like 4A	0.818798	0.0938298	0.724968	0.00101737
CDH1	Cadherin 1, type 1, E-cadherin (epithelial)	0.35611	-0.368284	0.724394	0.00602094
SLC27A6	Solute carrier family 27 (fatty acid transporter), member 6	0.781592	0.0596262	0.721966	0.00505209
CCDC11	Coiled-coil domain containing 11	0.806633	0.0860746	0.720558	0.00157137
MMP19	Matrix metallopeptidase 19	1.35626	0.636041	0.720222	1.92342e-05
TMTC2	Transmembrane and tetratricopeptide repeat containing 2	0.050342	-0.669497	0.719839	0.000355805
ENTPD3	Ectonucleoside triphosphate diphosphohydrolase 3	-2.46697	-3.18583	0.718855	0.00216007
SLC11A1	Solute carrier family 11 (proton-coupled divalent metal ion transporters), member 1	1.76179	1.04376	0.718034	0.000192761
CTBS	Chitobiase, di-N-acetyl-	0.805785	0.0878791	0.717906	1.35684e-05
ADSSL1	Adenylosuccinate synthase like 1	0.509999	-0.207056	0.717054	0.000364594
VCX2	Variable charge, X-linked 2	-0.118936	-0.835939	0.717003	0.00212531
KCNS1	Potassium voltage-gated channel, delayed-rectifier, subfamily S, member 1	-2.66811	-3.38509	0.716973	0.000556871
RNASE3	Ribonuclease, RNase A family, 3 (eosinophil cationic protein)	2.10621	1.39073	0.715474	0.00338115
CD3G	CD3g molecule, gamma (CD3-TCR complex)	0.334663	-0.380473	0.715136	0.000641289
C13orf33	Chromosome 13 open reading frame 33	-0.0792282	-0.794359	0.715131	0.000461309
GPRASP1	G protein-coupled receptor associated sorting protein 1	-2.92318	-3.63775	0.714573	0.0100188
CENTD1	Centaurin, delta 1	-0.345647	-1.059	0.713352	0.0138739
S100A11	S100 calcium binding protein A11	2.01912	1.30627	0.712852	0.000516484
KATNAL2	Katanin p60 subunit A-like 2	0.378237	-0.333807	0.712044	0.00116823
MYLK	Myosin, light chain kinase	-0.143785	-0.854766	0.710981	7.90566e-05
LRRC25	Leucine rich repeat containing 25	1.99227	1.28149	0.710776	0.00146816
MAP1LC3A	Microtubule-associated protein 1 light chain 3 alpha	-0.855066	-1.56503	0.709961	0.00333494
TNFRSF10C	Tumor necrosis factor receptor superfamily, member 10c, decoy without an intracellular domain	1.79077	1.08143	0.709346	1.35148e-05
IL2RA	Interleukin 2 receptor, alpha	1.94765	1.23995	0.707701	0.00613137
MARVELD1	MARVEL domain containing 1	1.30371	0.596713	0.706994	0.00171167
IGFBP6	Insulin-like growth factor binding protein 6	-0.35372	-1.05959	0.70587	0.000237184
UBQLNL	Ubiquilin-like	0.796075	0.0909492	0.705126	0.00683802
HHAT	Hedgehog acyltransferase	-0.636599	-1.34116	0.704558	0.00604132
OTP	Orthopedia homeobox	1.51481	0.810609	0.7042	0.000424886
ITGB4	Integrin, beta 4	1.59273	0.889795	0.702934	0.0114893
ANXA5	Annexin A5	2.2861	1.58331	0.702796	0.000655231
LACTB2	Lactamase, beta 2	0.709036	0.00637139	0.702664	0.00559873
RFTN1	Raftlin, lipid raft linker 1	-0.0157562	-0.718027	0.702271	0.00214034
PLEK2	Pleckstrin 2	1.99302	1.29095	0.702066	0.00276306
FZD6	Frizzled homolog 6 (Drosophila)	1.033	0.331103	0.701901	0.00527406
BNC2	Basonuclin 2	0.635748	-0.0655887	0.701337	3.14221e-05
LOC285141	Similar to CG14853-PB	0.096006	-0.604917	0.700923	0.00436646
TMIE	Transmembrane inner ear	-0.0535382	-0.75398	0.700442	0.00981314
RAB27A	RAB27A, member RAS oncogene family	1.24265	0.54336	0.699285	7.01851e-06
DSE		1.72566	1.02662	0.699042	1.23915e-05
MICALL2	MICAL-like 2	0.902852	0.204071	0.69878	0.000805324
RNASE4		1.53125	0.833773	0.69748	0.00591679
CCDC46	Coiled-coil domain containing 46	0.537997	-0.158797	0.696794	0.000198861
LIF	Leukemia inhibitory factor (cholinergic differentiation factor)	0.878218	0.181654	0.696563	1.32692e-06
CXCL6	Chemokine (C-X-C motif) ligand 6 (granulocyte chemotactic protein 2)	0.180504	-0.515915	0.696419	0.000359139
SLC2A3	Solute carrier family 2 (facilitated glucose transporter), member 3	-1.16315	-1.85922	0.696075	2.97018e-06
DKK3	Dickkopf homolog 3 (Xenopus laevis)	-1.63998	-2.33508	0.695107	0.00137973
LTB	Lymphotoxin beta (TNF superfamily, member 3)	0.295715	-0.398745	0.69446	0.000633206
NOD2	Nucleotide-binding oligomerization domain containing 2	2.0002	1.30608	0.694125	0.00157225
HKDC1	Hexokinase domain containing 1	0.844464	0.15096	0.693504	0.00366497
IGFBP3	Insulin-like growth factor binding protein 3	1.66497	0.971643	0.693327	0.00503865
NMNAT3	Nicotinamide nucleotide adenylyltransferase 3	0.495433	-0.197779	0.693212	0.0115324
ST8SIA781		1.39799	0.706016	0.691976	0.000159613
HSPB1	Heat shock 27kDa protein 1	0.970114	0.278313	0.691801	0.000530835
AHR	Aryl hydrocarbon receptor	1.40103	0.709359	0.691666	0.00651796
FAM3B	Family with sequence similarity 3, member B	-0.139234	-0.830818	0.691584	0.000803695
GPD1	Glycerol-3-phosphate dehydrogenase 1 (soluble)	-0.0262019	-0.717044	0.690842	6.41235e-05
C6orf105	Chromosome 6 open reading frame 105	-2.60071	-3.29134	0.690633	0.00316117
MGC87042	Similar to Six transmembrane epithelial antigen of prostate	0.548836	-0.141504	0.69034	0.00812025
CCDC89	Coiled-coil domain containing 89	1.16447	0.475126	0.689343	0.00765189
C6orf115	Chromosome 6 open reading frame 115	-0.235836	-0.924928	0.689092	0.000123384
ELL3	Elongation factor RNA polymerase II-like 3	0.125065	-0.563493	0.688558	0.000559607
ST8SIA623		0.73797	0.0499941	0.687976	0.000294719
HDHD3	Haloacid dehalogenase-like hydrolase domain containing 3	-0.363616	-1.05116	0.687545	0.000123768
C9orf52	Chromosome 9 open reading frame 52	0.892311	0.205197	0.687113	4.0077e-05
LOC283767	FLJ40198 protein	-1.12183	-1.80875	0.686928	0.00834613
CHPT1	Choline phosphotransferase 1	0.0261548	-0.659919	0.686074	4.19171e-06
C6orf206	Chromosome 6 open reading frame 206	-0.780391	-1.4656	0.685209	6.78144e-06
MAP3K8	Mitogen-activated protein kinase kinase kinase 8	1.06143	0.377609	0.683822	0.00776905
DPY19L1	Dpy-19-like 1 (C. elegans)	1.29403	0.612449	0.681581	0.000148363
ZMYND10	Zinc finger, MYND-type containing 10	1.07436	0.393089	0.681272	0.00750676
KCNJ15	Potassium inwardly-rectifying channel, subfamily J, member 15	1.22532	0.545174	0.680147	0.00293972
SLC15A3	Solute carrier family 15, member 3	1.11523	0.435151	0.680081	0.000123258
GALNT12	UDP-N-acetyl-alpha-D-galactosamine:polypeptide N-acetylgalactosaminyltransferase 12 (GalNAc-T12)	0.319905	-0.359769	0.679674	0.000723285
ADORA2B	Adenosine A2b receptor	-0.303994	-0.982872	0.678878	0.000144925
VIM	Vimentin	3.09149	2.41328	0.678213	0.0110435
BACE2	Beta-site APP-cleaving enzyme 2	0.975173	0.297205	0.677968	0.000106484
HS3ST3B1	Heparan sulfate (glucosamine) 3-O-sulfotransferase 3B1	1.28533	0.608369	0.676963	0.00754516
EGLN3	Egl nine homolog 3 (C. elegans)	-0.043498	-0.720281	0.676783	0.00220514
VAMP8	Vesicle-associated membrane protein 8 (endobrevin)	1.49202	0.815985	0.676031	0.000584251
GNG11	Guanine nucleotide binding protein (G protein), gamma 11	0.848197	0.172214	0.675983	0.00702038
LANCL3	LanC lantibiotic synthetase component C-like 3 (bacterial)	0.64887	-0.0268854	0.675756	0.0043443
TWSG1	Twisted gastrulation homolog 1 (Drosophila)	1.67912	1.00403	0.675086	0.000298039
ST6GALNAC2	ST6 (alpha-N-acetyl-neuraminyl-2,3-beta-galactosyl-1,3)-N-acetylgalactosaminide alpha-2,6-sialyltransferase 2	0.441812	-0.232079	0.673891	0.000255529
SPEF2	Sperm flagellar 2	-1.2758	-1.94901	0.673208	0.000407117
PPP1R3B	Protein phosphatase 1, regulatory (inhibitor) subunit 3B	2.01124	1.33819	0.673043	0.000143671
EDG6	Endothelial differentiation, lysophosphatidic acid G-protein-coupled receptor, 6	0.737887	0.0652351	0.672652	0.000109311
MVP	Major vault protein	1.10865	0.437214	0.671436	0.000123781
TNFAIP2	Tumor necrosis factor, alpha-induced protein 2	0.373383	-0.297896	0.671279	6.1744e-06
CLRN3	Clarin 3	-0.347322	-1.01798	0.67066	0.00107996
ALDH7A1	Aldehyde dehydrogenase 7 family, member A1	0.705711	0.0355246	0.670187	0.0104502
CPD	Carboxypeptidase D	0.629023	-0.0410362	0.670059	3.47561e-06
KLHL26	Kelch-like 26 (Drosophila)	-0.788721	-1.45824	0.669523	0.000855235
SELE	Selectin E (endothelial adhesion molecule 1)	-1.48301	-2.15185	0.668836	0.000264842
MS4A4A	Membrane-spanning 4-domains, subfamily A, member 4	2.34552	1.67872	0.666796	0.0126241
GMFG	Glia maturation factor, gamma	1.55823	0.892545	0.665686	0.00319364
CPM	Carboxypeptidase M	1.23498	0.569303	0.66568	0.00322103
C9orf116	Chromosome 9 open reading frame 116	-0.0624843	-0.727506	0.665022	0.000605657
FLJ10986	Hypothetical protein FLJ10986	-0.163192	-0.826954	0.663762	0.000705605
RUNX1	Runt-related transcription factor 1 (acute myeloid leukemia 1; aml1 oncogene)	1.57927	0.916569	0.662706	0.0040821
DDB2	Damage-specific DNA binding protein 2, 48kDa	1.12667	0.46403	0.66264	0.00445987
PDE6B	Phosphodiesterase 6B, cGMP-specific, rod, beta (congenital stationary night blindness 3, autosomal dominant)	-0.0103894	-0.672922	0.662533	0.00032339
ST8SIA241		-1.13872	-1.80064	0.661914	0.0012056
SLC43A3	Solute carrier family 43, member 3	1.16647	0.505392	0.661078	0.000222865
SLC16A6	Solute carrier family 16, member 6 (monocarboxylic acid transporter 7)	0.209525	-0.451152	0.660677	5.51495e-05
RETN	Resistin	1.59749	0.937169	0.660326	0.0015501
RCAN2	Regulator of calcineurin 2	-1.63315	-2.29269	0.659537	0.00620329
DNAJB1	DnaJ (Hsp40) homolog, subfamily B, member 1	0.736169	0.0767406	0.659429	0.000423252
C5orf32	Chromosome 5 open reading frame 32	-0.375454	-1.03391	0.658453	0.000471625
TNFAIP3	Tumor necrosis factor, alpha-induced protein 3	1.10947	0.452067	0.657405	1.50537e-05
CLUL1	Clusterin-like 1 (retinal)	-2.51592	-3.17196	0.656036	0.00116244
MRPS17	Mitochondrial ribosomal protein S17	0.865238	0.209328	0.65591	7.5142e-05
VSTM3	V-set and transmembrane domain containing 3	0.878072	0.222321	0.655751	5.05511e-07
CRIP1	Cysteine-rich protein 1 (intestinal)	0.866884	0.211439	0.655445	0.00331806
GPR171	G protein-coupled receptor 171	0.723846	0.0693892	0.654457	0.00011844
SLC1A3	Solute carrier family 1 (glial high affinity glutamate transporter), member 3	0.306666	-0.347735	0.654401	0.00534772
H2AFJ	H2A histone family, member J	0.788053	0.133852	0.6542	3.60615e-06
LOC26010	Viral DNA polymerase-transactivated protein 6	0.213054	-0.440454	0.653508	0.000652425
FSIP1	Fibrous sheath interacting protein 1	0.030629	-0.622597	0.653226	0.000102411
NUAK2	NUAK family, SNF1-like kinase, 2	1.10855	0.455571	0.652975	0.00102964
ALOX5	Arachidonate 5-lipoxygenase	0.890256	0.237415	0.652841	0.000411856
CDKL2	Cyclin-dependent kinase-like 2 (CDC2-related kinase)	-2.56211	-3.21408	0.651972	0.00684657
PLAUR	Plasminogen activator, urokinase receptor	1.23231	0.58052	0.651794	0.000363278
MYL9	Myosin, light chain 9, regulatory	0.726382	0.0746904	0.651691	2.72507e-07
BGN	Biglycan	1.44035	0.789311	0.651042	0.000215805
PLEK	Pleckstrin	1.385	0.734401	0.650599	0.00902464
PADI2	Peptidyl arginine deiminase, type II	0.734933	0.0844076	0.650525	0.00101487
FCGR2A	Fc fragment of IgG, low affinity IIa, receptor (CD32)	2.11127	1.4608	0.650463	0.00328815
IGFBP7	Insulin-like growth factor binding protein 7	2.35839	1.70829	0.650096	0.00257911
BLVRB	Biliverdin reductase B (flavin reductase (NADPH))	-0.0899996	-0.739061	0.649062	0.000501813
RHBDL2	Rhomboid, veinlet-like 2 (Drosophila)	-0.465912	-1.11466	0.648749	3.69147e-05
GIMAP2	GTPase, IMAP family member 2	2.07603	1.42734	0.648689	0.00983966
IL15	Interleukin 15	1.2613	0.613147	0.648153	0.00539214
IER3	Immediate early response 3	0.645686	-0.00221047	0.647896	0.0103601
PLK3	Polo-like kinase 3 (Drosophila)	0.506913	-0.139801	0.646714	8.51709e-05
SHROOM1	Shroom family member 1	-0.198265	-0.844416	0.646151	0.00373406
CARD6	Caspase recruitment domain family, member 6	1.40312	0.757541	0.645574	0.00480304
LOXL2	Lysyl oxidase-like 2	2.44122	1.79616	0.64506	0.00651641
LRRIQ1	Leucine-rich repeats and IQ motif containing 1	-0.651633	-1.29549	0.643854	0.00189386
CD248	CD248 molecule, endosialin	1.72603	1.08227	0.643756	0.0037023
PDLIM3	PDZ and LIM domain 3	1.18387	0.541244	0.642625	0.00240927
ASAHL	N-acylsphingosine amidohydrolase (acid ceramidase)-like	0.148638	-0.493965	0.642604	0.000121896
ST8SIA219		1.3957	0.753158	0.642547	0.000712226
SLC22A5	Solute carrier family 22 (organic cation transporter), member 5	0.274839	-0.365088	0.639927	0.00728307
GYG2	Glycogenin 2	0.862405	0.223079	0.639326	0.00595921
SLC41A2	Solute carrier family 41, member 2	0.599796	-0.0387172	0.638514	1.15668e-05
KDELC2	KDEL (Lys-Asp-Glu-Leu) containing 2	1.4993	0.860819	0.63848	0.000496377
ACADL	Acyl-Coenzyme A dehydrogenase, long chain	0.235212	-0.401511	0.636723	0.00334923
IL4I1		1.71662	1.0802	0.636415	0.00392881
CHST2	Carbohydrate (N-acetylglucosamine-6-O) sulfotransferase 2	0.170757	-0.465624	0.636382	0.000889718
RTDR1	Rhabdoid tumor deletion region gene 1	0.14682	-0.489462	0.636282	0.000202332
BET1	Blocked early in transport 1 homolog (S. cerevisiae)	1.07782	0.441741	0.63608	1.06342e-05
C19orf59		0.935805	0.300214	0.635591	5.54038e-05
ARSE	Arylsulfatase E (chondrodysplasia punctata 1)	0.705558	0.0702493	0.635308	0.000451719
SNCA	Synuclein, alpha (non A4 component of amyloid precursor)	-4.28339	-4.91853	0.63514	0.00720275
SDC4	Syndecan 4	0.0614788	-0.573658	0.635137	0.00418295
EVC	Ellis van Creveld syndrome	0.910268	0.275514	0.634754	0.00037148
ST8SIA799		0.397234	-0.237081	0.634315	0.00428227
RELB	V-rel reticuloendotheliosis viral oncogene homolog B, nuclear factor of kappa light polypeptide gene enhancer in B-cells 3 (avian)	0.662723	0.0286924	0.63403	0.000267882
APOBEC3F	Apolipoprotein B mRNA editing enzyme, catalytic polypeptide-like 3F	1.71483	1.08131	0.633524	0.000239286
FOSL2	FOS-like antigen 2	0.569848	-0.0630792	0.632928	3.66119e-05
SERPINF1	Serpin peptidase inhibitor, clade F (alpha-2 antiplasmin, pigment epithelium derived factor), member 1	-1.0639	-1.69639	0.632493	0.00511843
NEB	Nebulin	1.16626	0.533959	0.632306	0.00990447
LAYN	Layilin	0.618391	-0.0138449	0.632236	0.000105472
C3orf55	Chromosome 3 open reading frame 55	-0.643139	-1.27505	0.631908	0.000329548
ANG	Angiogenin, ribonuclease, RNase A family, 5	1.52236	0.891002	0.631355	0.00580544
PTPRC	Protein tyrosine phosphatase, receptor type, C	1.24287	0.611728	0.631147	0.00437249
COLEC11	Collectin sub-family member 11	-0.0842217	-0.715051	0.630829	0.00110747
MBOAT1	Membrane bound O-acyltransferase domain containing 1	1.81828	1.18765	0.630633	0.00596326
ST8SIA242		1.69285	1.0624	0.630444	0.000382668
ST8SIA544		0.460828	-0.169136	0.629964	0.00123044
RIN1	Ras and Rab interactor 1	-0.725118	-1.355	0.629886	0.00328536
C20orf134	Chromosome 20 open reading frame 134	0.713619	0.083893	0.629726	0.000257084
ACTA2	Actin, alpha 2, smooth muscle, aorta	1.33724	0.707765	0.629474	0.00558513
ISLR	Immunoglobulin superfamily containing leucine-rich repeat	-0.391164	-1.02045	0.62929	0.00392735
CDKN1A	Cyclin-dependent kinase inhibitor 1A (p21, Cip1)	1.59328	0.964267	0.629011	0.00528839
EFNB2	Ephrin-B2	-0.186151	-0.814485	0.628334	0.00118472
CYBRD1	Cytochrome b reductase 1	0.949491	0.321376	0.628115	0.00351535
AIFM2	Apoptosis-inducing factor, mitochondrion-associated, 2	0.0448201	-0.583214	0.628034	0.000657616
EGFL6	EGF-like-domain, multiple 6	-0.227765	-0.855022	0.627257	0.00996736
COL4A1	Collagen, type IV, alpha 1	3.27181	2.64516	0.626652	0.00527891
RCAN3	RCAN family member 3	0.325806	-0.300696	0.626502	0.00847114
TNFSF4	Tumor necrosis factor (ligand) superfamily, member 4 (tax-transcriptionally activated glycoprotein 1, 34kDa)	0.468804	-0.157681	0.626484	0.000384744
ST8SIA213		-2.07049	-2.69645	0.625969	0.00194564
FES	Feline sarcoma oncogene	0.646697	0.0212264	0.62547	0.000296325
ST8SIA41		0.192331	-0.432943	0.625274	7.51846e-05
PTPN14	Protein tyrosine phosphatase, non-receptor type 14	0.281635	-0.343623	0.625258	0.000121988
DLC1	Deleted in liver cancer 1	-0.187493	-0.812725	0.625232	0.00108077
ZFAND2A	Zinc finger, AN1-type domain 2A	-0.0214649	-0.645813	0.624348	1.84455e-05
EVI2B	Ecotropic viral integration site 2B	1.04815	0.424716	0.623434	0.00257724
IGFBP5	Insulin-like growth factor binding protein 5	1.64298	1.02026	0.622718	0.00661828
KCNMB1	Potassium large conductance calcium-activated channel, subfamily M, beta member 1	1.22136	0.598674	0.622684	0.000297685
C1QTNF1	C1q and tumor necrosis factor related protein 1	1.21977	0.597659	0.622115	0.000217542
SLC7A7	Solute carrier family 7 (cationic amino acid transporter, y+ system), member 7	1.99738	1.37568	0.621698	0.00428812
PSMB8	Proteasome (prosome, macropain) subunit, beta type, 8 (large multifunctional peptidase 7)	2.28286	1.66167	0.62119	0.00824685
PMFBP1	Polyamine modulated factor 1 binding protein 1	1.24819	0.627563	0.620625	5.6789e-05
FNDC4	Fibronectin type III domain containing 4	0.273849	-0.346672	0.620521	0.000795075
ACTG2	Actin, gamma 2, smooth muscle, enteric	1.14934	0.530833	0.618512	0.0137007
SRCRB4D	Scavenger receptor cysteine rich domain containing, group B (4 domains)	-0.0637765	-0.681397	0.617621	0.000230825
SPHK1	Sphingosine kinase 1	0.810645	0.193524	0.617122	0.000447086
RP11-217H1.1	Implantation-associated protein	1.40393	0.786832	0.617099	0.000127551
LAIR1	Leukocyte-associated immunoglobulin-like receptor 1	1.78928	1.17306	0.616229	0.00678402
CASP6	Caspase 6, apoptosis-related cysteine peptidase	1.86511	1.24911	0.615997	0.00021076
APOBEC3C	Apolipoprotein B mRNA editing enzyme, catalytic polypeptide-like 3C	1.65169	1.03585	0.615843	0.000116718
ST8SIA892		-0.599341	-1.21424	0.614897	0.000249638
BCAP29	B-cell receptor-associated protein 29	0.925546	0.310787	0.614759	0.000117303
C2	Complement component 2	0.864747	0.250635	0.614113	0.000397752
IQUB	IQ motif and ubiquitin domain containing	0.528891	-0.0850005	0.613892	0.000404926
LOXL4	Lysyl oxidase-like 4	0.587928	-0.0256765	0.613604	3.27704e-05
PRPS2	Phosphoribosyl pyrophosphate synthetase 2	-0.0519839	-0.664876	0.612892	0.00474988
AK3L1	Adenylate kinase 3-like 1	-0.125925	-0.738386	0.612461	0.00332807
C14orf45	Chromosome 14 open reading frame 45	0.0492228	-0.563081	0.612304	0.00181849
C16orf74	Chromosome 16 open reading frame 74	-0.290967	-0.903182	0.612215	0.00169245
PQLC3	PQ loop repeat containing 3	1.31315	0.701377	0.611775	0.00306142
ST8SIA82		0.229474	-0.382285	0.611759	0.00637369
MFSD7	Major facilitator superfamily domain containing 7	0.724819	0.113177	0.611642	0.00112175
ATP10D	ATPase, class V, type 10D	1.05829	0.447122	0.611169	0.00320459
UGCG	UDP-glucose ceramide glucosyltransferase	0.241981	-0.368588	0.610569	6.09079e-05
ADAMTS3	ADAM metallopeptidase with thrombospondin type 1 motif, 3	0.00939057	-0.60058	0.60997	0.013622
ZNRF2	Zinc and ring finger 2	0.935592	0.325884	0.609707	0.000208979
HAVCR2	Hepatitis A virus cellular receptor 2	1.52784	0.918649	0.609194	0.00491977
CD63	CD63 molecule	1.63709	1.02822	0.608876	0.000194491
SRD5A1	Steroid-5-alpha-reductase, alpha polypeptide 1 (3-oxo-5 alpha-steroid delta 4-dehydrogenase alpha 1)	1.06586	0.457443	0.608415	0.00127067
CEBPE	CCAAT/enhancer binding protein (C/EBP), epsilon	1.65378	1.04554	0.60824	0.00428124
MTMR11	Myotubularin related protein 11	1.46954	0.861661	0.607881	0.00801483
ST8SIA837		0.951254	0.343689	0.607565	0.00564924
PTCRA	Pre T-cell antigen receptor alpha	0.878078	0.271119	0.606959	0.00176725
IL17RC	Interleukin 17 receptor C	0.373016	-0.233784	0.606801	0.00590488
CD14	CD14 molecule	1.8207	1.21439	0.60631	0.00315422
SP140	SP140 nuclear body protein	0.787456	0.18152	0.605937	8.20933e-05
NMRAL1	NmrA-like family domain containing 1	-0.0244509	-0.629913	0.605463	0.00571431
HOXB4	Homeobox B4	1.0894	0.484364	0.605031	0.00654663
YIPF1	Yip1 domain family, member 1	0.346977	-0.257055	0.604031	0.000101487
RFESD	Rieske (Fe-S) domain containing	0.661844	0.0584427	0.603401	0.000405979
SPATA4	Spermatogenesis associated 4	-0.228051	-0.830378	0.602327	0.0079899
ASS1	Argininosuccinate synthetase 1	-0.876423	-1.47859	0.602172	7.28772e-05
IFITM1		0.103229	-0.498856	0.602085	0.0145293
ZNF480	Zinc finger protein 480	2.08209	1.48064	0.601446	0.000121453
PLXDC2	Plexin domain containing 2	0.943228	0.342033	0.601195	0.00239406
FAH	Fumarylacetoacetate hydrolase (fumarylacetoacetase)	0.237161	-0.36355	0.600711	0.000280312
MGST2	Microsomal glutathione S-transferase 2	0.787139	0.186697	0.600441	0.0018537
HRASLS5	HRAS-like suppressor family, member 5	-0.752108	-1.35245	0.600339	0.000137792
B3GNT8	UDP-GlcNAc:betaGal beta-1,3-N-acetylglucosaminyltransferase 8	0.143935	-0.45592	0.599855	8.97575e-07
PTGER4	Prostaglandin E receptor 4 (subtype EP4)	0.864367	0.264585	0.599782	0.00240822
FLJ45803	FLJ45803 protein	-0.073166	-0.67174	0.598574	0.00205677
PON2	Paraoxonase 2	0.954583	0.35603	0.598553	0.0139822
CTSH	Cathepsin H	0.0344284	-0.563245	0.597673	0.0118168
IQGAP1	IQ motif containing GTPase activating protein 1	1.75583	1.15845	0.59738	3.20569e-05
KIAA0040	KIAA0040	1.839	1.24201	0.596993	0.00204734
CYB561	Cytochrome b-561	-1.04469	-1.64142	0.596728	8.50627e-05
LEF1	Lymphoid enhancer-binding factor 1	1.39635	0.79983	0.596524	0.00465698
IL21R	Interleukin 21 receptor	0.390646	-0.205039	0.595685	0.00224766
TTC26	Tetratricopeptide repeat domain 26	1.51878	0.923182	0.595601	3.01434e-06
APLN	Apelin, AGTRL1 ligand	1.28636	0.692536	0.593823	0.00417257
PRPH2	Peripherin 2 (retinal degeneration, slow)	-3.38509	-3.97833	0.593247	0.00218007
TP53AP1	TP53 activated protein 1	1.27139	0.678671	0.592719	0.000528027
ST8SIA724		1.06709	0.474615	0.592473	0.00528632
GPX1	Glutathione peroxidase 1	0.651017	0.0587427	0.592274	0.000175744
EPDR1	Ependymin related protein 1 (zebrafish)	-0.977644	-1.56975	0.592101	0.000451271
USP53	Ubiquitin specific peptidase 53	0.207495	-0.384456	0.59195	0.00373785
C1GALT1	Core 1 synthase, glycoprotein-N-acetylgalactosamine 3-beta-galactosyltransferase, 1	0.199783	-0.391208	0.590991	6.19883e-06
GOLT1A	Golgi transport 1 homolog A (S. cerevisiae)	-1.47223	-2.06248	0.590244	0.00402039
EHD2	EH-domain containing 2	0.91452	0.324389	0.590131	0.00240778
MORN3	MORN repeat containing 3	0.0781312	-0.511979	0.59011	0.000316607
ELN	Elastin (supravalvular aortic stenosis, Williams-Beuren syndrome)	1.26586	0.675932	0.589926	0.000425441
EFCBP1	EF-hand calcium binding protein 1	-2.06592	-2.65575	0.589831	0.00417665
FLJ21438	Hypothetical protein FLJ21438	0.800059	0.21024	0.589819	0.00990762
C17orf64	Chromosome 17 open reading frame 64	0.501336	-0.0875127	0.588849	0.000278712
REXO2	REX2, RNA exonuclease 2 homolog (S. cerevisiae)	0.812732	0.224517	0.588215	4.1943e-05
RNF175	Ring finger protein 175	-0.978419	-1.56589	0.587474	0.00966795
EMP2	Epithelial membrane protein 2	-0.00895871	-0.596181	0.587222	0.0132973
IL1RN	Interleukin 1 receptor antagonist	0.334535	-0.252566	0.587101	0.00634212
GSTK1	Glutathione S-transferase kappa 1	0.874407	0.287493	0.586915	0.000380364
VWA1	Von Willebrand factor A domain containing 1	0.211496	-0.375264	0.58676	0.000435139
VILL	Villin-like	-0.924141	-1.51085	0.586705	0.006709
PROS1	Protein S (alpha)	2.20606	1.61949	0.586571	0.012803
A2M	Alpha-2-macroglobulin	0.843546	0.256997	0.586549	0.0119982
SLFN12	Schlafen family member 12	1.6445	1.05841	0.586091	0.00400933
RPA3	Replication protein A3, 14kDa	1.01159	0.425843	0.585752	0.000429739
MYL5	Myosin, light chain 5, regulatory	0.183247	-0.401308	0.584555	0.00134822
C4orf6	Chromosome 4 open reading frame 6	1.98628	1.40181	0.584472	0.00203341
DCTD	DCMP deaminase	0.351361	-0.233047	0.584408	0.00269304
PODNL1	Podocan-like 1	0.536296	-0.0473396	0.583636	3.05919e-05
MREG	Melanoregulin	1.33342	0.750446	0.582973	0.00616922
GALM	Galactose mutarotase (aldose 1-epimerase)	0.834381	0.251629	0.582753	5.72294e-05
LRRC43	Leucine rich repeat containing 43	-0.49299	-1.07477	0.581778	0.00634294
C1orf87	Chromosome 1 open reading frame 87	-0.0456978	-0.627234	0.581537	0.000900969
LRRC6	Leucine rich repeat containing 6	0.29425	-0.286783	0.581033	0.00773822
ST8SIA172		0.666132	0.0858486	0.580284	1.62989e-06
SLC4A3	Solute carrier family 4, anion exchanger, member 3	-0.934358	-1.51368	0.579322	0.00247561
ARHGAP29	Rho GTPase activating protein 29	0.113761	-0.465512	0.579273	0.000124002
AP1S3	Adaptor-related protein complex 1, sigma 3 subunit	0.615026	0.0358113	0.579215	0.000122804
CTSL1	Cathepsin L1	1.08936	0.510432	0.578925	0.000594973
TXNDC3		0.706029	0.127568	0.578462	0.000358699
FAM126A	Family with sequence similarity 126, member A	1.49845	0.92054	0.577908	0.000409353
SIPA1L1	Signal-induced proliferation-associated 1 like 1	-0.111396	-0.688854	0.577458	0.00052507
CYP4V2	Cytochrome P450, family 4, subfamily V, polypeptide 2	0.588949	0.0124543	0.576494	0.0143437
ST8SIA581		0.923598	0.347585	0.576013	0.00235481
DCBLD2	Discoidin, CUB and LCCL domain containing 2	1.38915	0.8136	0.575552	0.000673749
NOL3	Nucleolar protein 3 (apoptosis repressor with CARD domain)	0.227723	-0.347756	0.575479	0.000443485
SH3GLB1	SH3-domain GRB2-like endophilin B1	1.4684	0.893309	0.575088	0.000151798
SLC16A4	Solute carrier family 16, member 4 (monocarboxylic acid transporter 5)	1.54998	0.975327	0.574657	0.00179617
OLFML2B	Olfactomedin-like 2B	0.893779	0.319424	0.574355	0.00310837
PRSS23	Protease, serine, 23	1.06967	0.495617	0.57405	0.00566817
TSGA10	Testis specific, 10	0.0451461	-0.528659	0.573805	0.00415898
RILP	Rab interacting lysosomal protein	-0.584532	-1.15803	0.573499	0.000712584
DAO	D-amino-acid oxidase	0.478992	-0.0944831	0.573475	0.00541441
PPIL6	Peptidylprolyl isomerase (cyclophilin)-like 6	0.159372	-0.413224	0.572596	0.000710175
LILRB2	Leukocyte immunoglobulin-like receptor, subfamily B (with TM and ITIM domains), member 2	1.49536	0.923639	0.571717	0.00727758
ZFP36L2	Zinc finger protein 36, C3H type-like 2	2.09812	1.52659	0.571536	0.00571027
WDR66	WD repeat domain 66	-0.0794888	-0.650711	0.571223	0.00312179
C13orf31	Chromosome 13 open reading frame 31	-0.407011	-0.976545	0.569534	0.00011508
C1orf110	Chromosome 1 open reading frame 110	-0.532816	-1.10214	0.569322	0.00225008
SLA	Src-like-adaptor	0.680223	0.111382	0.568841	0.00307566
ARPC1B	Actin related protein 2/3 complex, subunit 1B, 41kDa	1.66714	1.09853	0.568606	0.0014572
CENTA2	Centaurin, alpha 2	1.17554	0.607467	0.568076	0.00305163
DOK3	Docking protein 3	1.30974	0.741883	0.567859	5.75756e-05
KLF5	Kruppel-like factor 5 (intestinal)	-0.894389	-1.46073	0.566337	0.000208816
KIAA0323	KIAA0323	0.30937	-0.256632	0.566002	0.00055696
FYB	FYN binding protein (FYB-120/130)	1.2047	0.639398	0.565305	0.012279
EMR1	Egf-like module containing, mucin-like, hormone receptor-like 1	0.367807	-0.1974	0.565207	0.00169858
FZD1	Frizzled homolog 1 (Drosophila)	0.497685	-0.0664983	0.564183	6.78623e-06
LZTS1	Leucine zipper, putative tumor suppressor 1	-0.568665	-1.13237	0.563701	0.00474895
ST8SIA442		1.20042	0.6373	0.563125	0.00291991
PHACTR2	Phosphatase and actin regulator 2	-0.859878	-1.42219	0.562311	0.000662775
FAM92B	Family with sequence similarity 92, member B	0.652903	0.0914368	0.561466	0.00281102
HEXB	Hexosaminidase B (beta polypeptide)	1.22848	0.667378	0.561097	0.000603943
CDRT4	CMT1A duplicated region transcript 4	-0.453084	-1.01416	0.56108	0.000433865
ROM1	Retinal outer segment membrane protein 1	0.787337	0.226775	0.560563	0.0129677
MMP14	Matrix metallopeptidase 14 (membrane-inserted)	1.36442	0.803945	0.560476	0.00020993
RHCG	Rh family, C glycoprotein	-1.43019	-1.99002	0.559827	0.000265982
FGD4	FYVE, RhoGEF and PH domain containing 4	0.0630786	-0.496502	0.559581	0.0006276
BRI3	Brain protein I3	0.914721	0.355499	0.559221	9.94778e-06
ST8SIA272		0.180483	-0.377684	0.558167	6.78603e-05
FN1	Fibronectin 1	1.95744	1.39949	0.557951	0.00184789
IL1R1	Interleukin 1 receptor, type I	0.612604	0.0548003	0.557804	0.00768966
ST8SIA880		1.00155	0.443854	0.557697	0.000966378
ITGA2	Integrin, alpha 2 (CD49B, alpha 2 subunit of VLA-2 receptor)	1.36187	0.804527	0.557338	0.00918544
SIGLEC5	Sialic acid binding Ig-like lectin 5	1.47932	0.922476	0.556845	0.0131677
SOAT1	Sterol O-acyltransferase (acyl-Coenzyme A: cholesterol acyltransferase) 1	1.72163	1.16506	0.556574	9.12294e-05
ZAR1	Zygote arrest 1	0.711101	0.155569	0.555532	0.0114546
LOC150223	LOC150223 protein	-1.10699	-1.66211	0.555124	0.00125098
ARHGAP9	Rho GTPase activating protein 9	0.874297	0.319296	0.555	0.00596528
FLVCR2	Feline leukemia virus subgroup C cellular receptor family, member 2	1.76738	1.21281	0.554574	0.00120645
TRIM5	Tripartite motif-containing 5	1.53932	0.985454	0.553869	0.000584359
MCFD2	Multiple coagulation factor deficiency 2	0.431475	-0.121798	0.553273	1.77348e-06
ST20		0.827477	0.274482	0.552995	0.000268792
P2RY6	Pyrimidinergic receptor P2Y, G-protein coupled, 6	0.839093	0.286645	0.552448	0.000423206
PERP	PERP, TP53 apoptosis effector	-0.129043	-0.680009	0.550965	0.00123953
CRTAM	Cytotoxic and regulatory T cell molecule	0.293787	-0.256802	0.55059	0.00078642
ST8SIA487		0.288228	-0.262254	0.550482	0.000124529
SGMS2	Sphingomyelin synthase 2	0.290819	-0.259525	0.550344	1.0256e-05
ST8SIA90		-0.0831859	-0.632829	0.549643	0.00151867
SH2D1A	SH2 domain protein 1A, Duncan's disease (lymphoproliferative syndrome)	0.775845	0.226305	0.54954	0.00142777
PALLD	Palladin, cytoskeletal associated protein	1.67729	1.128	0.54929	0.00160897
IRAK4	Interleukin-1 receptor-associated kinase 4	1.99725	1.44867	0.54857	5.72012e-05
ST8SIA37		-1.07563	-1.62391	0.548285	0.00995415
KIF9	Kinesin family member 9	0.0332026	-0.514856	0.548059	0.000102781
LIN7A	Lin-7 homolog A (C. elegans)	0.107365	-0.440438	0.547803	0.000365278
MTHFS	5,10-methenyltetrahydrofolate synthetase (5-formyltetrahydrofolate cyclo-ligase)	0.804916	0.257357	0.547559	0.000128063
RHBDF2	Rhomboid 5 homolog 2 (Drosophila)	0.664216	0.116777	0.547439	0.00446145
HOMER2	Homer homolog 2 (Drosophila)	-0.7243	-1.27031	0.546013	0.00148531
METRNL	Meteorin, glial cell differentiation regulator-like	0.48	-0.0658741	0.545874	0.00194073
ARL4C	ADP-ribosylation factor-like 4C	1.02871	0.484352	0.544357	0.0144251
C21orf25		-0.377055	-0.921307	0.544252	0.00257617
AGA	Aspartylglucosaminidase	1.32539	0.781301	0.544093	0.000620482
TMSL3	Thymosin-like 3	0.992089	0.448147	0.543942	0.00591258
ZNF533	Zinc finger protein 533	-2.88002	-3.4238	0.543785	0.00171187
HCST	Hematopoietic cell signal transducer	0.901239	0.357492	0.543747	0.00532205
C14orf161		0.864845	0.321167	0.543678	0.000113121
CTSB	Cathepsin B	1.03301	0.489581	0.543425	0.00116713
C9orf3	Chromosome 9 open reading frame 3	-0.0638055	-0.60672	0.542914	0.000909791
DPH3	DPH3, KTI11 homolog (S. cerevisiae)	1.38535	0.842518	0.542832	0.000744858
HDC	Histidine decarboxylase	-0.0396979	-0.582202	0.542504	0.0110298
HTRA4	HtrA serine peptidase 4	1.20638	0.663886	0.54249	0.00358528
LIMS1	LIM and senescent cell antigen-like domains 1	1.43441	0.892039	0.542375	0.00224639
ST8SIA152		0.775762	0.233812	0.541951	0.000741179
SIGLEC9	Sialic acid binding Ig-like lectin 9	1.87758	1.33602	0.541555	0.000694682
PRKCDBP	Protein kinase C, delta binding protein	0.130238	-0.410955	0.541193	0.00118593
ARMC10	Armadillo repeat containing 10	-0.110627	-0.651227	0.540599	1.83681e-06
SLC26A4	Solute carrier family 26, member 4	-1.88097	-2.42155	0.540581	0.00345857
SERTAD1	SERTA domain containing 1	0.855749	0.315255	0.540494	0.0010009
FBXO4	F-box protein 4	1.61068	1.07019	0.540485	0.00404714
FTHP1	Ferritin, heavy polypeptide pseudogene 1	-0.23291	-0.772524	0.539615	0.000892351
PLEKHF1	Pleckstrin homology domain containing, family F (with FYVE domain) member 1	0.226502	-0.313027	0.539529	0.00143999
IMPACT	Impact homolog (mouse)	0.631763	0.0925051	0.539258	0.0074867
APOBEC3A	Apolipoprotein B mRNA editing enzyme, catalytic polypeptide-like 3A	0.482774	-0.0555334	0.538307	0.00117323
ACTN3	Actinin, alpha 3	-0.047573	-0.585563	0.53799	0.000639519
APH1B	Anterior pharynx defective 1 homolog B (C. elegans)	1.3042	0.766476	0.537722	0.000242392
CD27	CD27 molecule	0.462332	-0.0748676	0.5372	7.38471e-06
SLC22A4	Solute carrier family 22 (organic cation transporter), member 4	0.602086	0.0649314	0.537155	0.00981204
FTL	Ferritin, light polypeptide	0.699467	0.162322	0.537145	0.00599139
FBXO6	F-box protein 6	-0.0122794	-0.549102	0.536822	0.0044258
NRCAM	Neuronal cell adhesion molecule	-0.165839	-0.702419	0.53658	0.0081451
GGTLA1	Gamma-glutamyltransferase-like activity 1	1.32291	0.786385	0.536522	0.00205677
C2orf59	Chromosome 2 open reading frame 59	0.503548	-0.0325938	0.536142	0.000264567
DUSP1	Dual specificity phosphatase 1	0.838552	0.302515	0.536037	0.0111585
ITGB2	Integrin, beta 2 (complement component 3 receptor 3 and 4 subunit)	1.6534	1.11821	0.535185	0.00597891
ERBB2	V-erb-b2 erythroblastic leukemia viral oncogene homolog 2, neuro/glioblastoma derived oncogene homolog (avian)	0.800456	0.265625	0.534832	0.00216881
PRDX6	Peroxiredoxin 6	0.161997	-0.372685	0.534682	4.22282e-05
DNALI1	Dynein, axonemal, light intermediate chain 1	1.59347	1.0589	0.534569	0.00196272
ST8SIA849		0.269877	-0.264587	0.534464	0.000175642
DNAL1	Dynein, axonemal, light chain 1	0.0717613	-0.460849	0.53261	1.11487e-05
EPAS1	Endothelial PAS domain protein 1	0.195477	-0.337045	0.532523	0.00249366
LPHN2	Latrophilin 2	-0.674843	-1.20709	0.532243	0.0035993
AGTRL1	Angiotensin II receptor-like 1	0.646165	0.114089	0.532076	0.00106957
RRAS	Related RAS viral (r-ras) oncogene homolog	0.800752	0.268825	0.531927	6.87383e-05
GTF2IRD2	GTF2I repeat domain containing 2	1.20494	0.673376	0.53156	0.00109557
NIPSNAP3B	Nipsnap homolog 3B (C. elegans)	-0.741759	-1.27322	0.531466	0.00156959
SLC35D1	Solute carrier family 35 (UDP-glucuronic acid/UDP-N-acetylgalactosamine dual transporter), member D1	1.57401	1.04279	0.531221	0.0031548
MDM2	Mdm2, transformed 3T3 cell double minute 2, p53 binding protein (mouse)	1.21277	0.681555	0.531215	4.98959e-05
NUPR1	Nuclear protein 1	1.58186	1.05126	0.530605	0.00659103
MGAT4A	Mannosyl (alpha-1,3-)-glycoprotein beta-1,4-N-acetylglucosaminyltransferase, isozyme A	1.43512	0.904637	0.530482	0.00654557
EMID1	EMI domain containing 1	0.156467	-0.373588	0.530055	9.13605e-05
NEK11	NIMA (never in mitosis gene a)- related kinase 11	0.517507	-0.0125183	0.530025	0.010998
TRIM21	Tripartite motif-containing 21	1.18035	0.650863	0.529484	0.00047295
ECGF1	Endothelial cell growth factor 1 (platelet-derived)	1.53378	1.00468	0.5291	0.00189501
TRPV2	Transient receptor potential cation channel, subfamily V, member 2	-0.481388	-1.0102	0.528808	9.57261e-05
CATSPER1	Cation channel, sperm associated 1	1.06708	0.53893	0.528152	0.000187358
SLC38A6	Solute carrier family 38, member 6	1.50648	0.979539	0.526944	0.000236465
RAB11FIP1	RAB11 family interacting protein 1 (class I)	-0.115309	-0.6417	0.526391	0.00183349
LOC93349	Hypothetical protein BC004921	1.08255	0.556664	0.525887	0.000404398
ST8SIA683		1.07886	0.553378	0.525487	0.0117152
PDK3	Pyruvate dehydrogenase kinase, isozyme 3	0.251958	-0.273476	0.525434	0.000288989
SERPINB6	Serpin peptidase inhibitor, clade B (ovalbumin), member 6	1.01302	0.488149	0.524871	0.000351112
FLT1	Fms-related tyrosine kinase 1 (vascular endothelial growth factor/vascular permeability factor receptor)	0.73999	0.215444	0.524545	0.00514346
FLJ37440		0.392522	-0.130915	0.523438	0.00392849
PYCARD	PYD and CARD domain containing	1.25293	0.729986	0.522944	0.0107965
FLJ22374	Hypothetical protein FLJ22374	1.33482	0.812004	0.522819	0.00446035
ROR1	Receptor tyrosine kinase-like orphan receptor 1	0.647076	0.124899	0.522177	0.00319043
APOB48R	Apolipoprotein B48 receptor	1.6669	1.14533	0.521568	0.00110166
CPZ	Carboxypeptidase Z	0.0879579	-0.43348	0.521438	0.0130204
DRG2	Developmentally regulated GTP binding protein 2	0.121639	-0.399337	0.520976	0.00978239
MYOM1	Myomesin 1, 185kDa	-0.615961	-1.13691	0.520944	0.00313418
HCLS1	Hematopoietic cell-specific Lyn substrate 1	1.30745	0.786618	0.520836	0.0139836
ST8SIA153		1.40463	0.884498	0.520128	0.0115244
SOCS1	Suppressor of cytokine signaling 1	0.523707	0.00359728	0.52011	0.00017698
MMAA	Methylmalonic aciduria (cobalamin deficiency) cblA type	1.17521	0.655257	0.519955	0.000299776
C14orf140	Chromosome 14 open reading frame 140	0.186624	-0.333023	0.519648	0.000835597
TMSB10	Thymosin, beta 10	-0.0194431	-0.538835	0.519392	0.000404643
CD97	CD97 molecule	1.11271	0.593707	0.519	0.00565872
TUBA1C	Tubulin, alpha 1c	1.06752	0.548541	0.51898	0.00082024
CXCR3	Chemokine (C-X-C motif) receptor 3	0.469908	-0.0485555	0.518463	0.000436232
CYBA	Cytochrome b-245, alpha polypeptide	1.17593	0.657597	0.518336	0.00148748
KCNN4	Potassium intermediate/small conductance calcium-activated channel, subfamily N, member 4	-0.0488217	-0.566578	0.517756	0.00652481
B3GALT4	UDP-Gal:betaGlcNAc beta 1,3-galactosyltransferase, polypeptide 4	-0.350947	-0.868313	0.517367	0.00742716
HEBP2	Heme binding protein 2	1.04706	0.529828	0.517229	0.00378019
SLC2A1	Solute carrier family 2 (facilitated glucose transporter), member 1	0.59294	0.0761403	0.516799	3.18639e-05
RHOH	Ras homolog gene family, member H	1.33348	0.816736	0.516748	0.00414124
ST8SIA371		-0.124798	-0.641485	0.516687	0.0107308
PPP1R14A	Protein phosphatase 1, regulatory (inhibitor) subunit 14A	-0.858821	-1.37537	0.516552	0.0107154
MGC14376	Hypothetical protein MGC14376	-0.162625	-0.678468	0.515842	0.000933408
HUS1	HUS1 checkpoint homolog (S. pombe)	1.12943	0.613658	0.515776	0.000417754
ACADS	Acyl-Coenzyme A dehydrogenase, C-2 to C-3 short chain	0.348146	-0.167103	0.515249	0.00266529
ARHGAP30	Rho GTPase activating protein 30	1.83524	1.32037	0.514874	0.00391823
LCP2	Lymphocyte cytosolic protein 2 (SH2 domain containing leukocyte protein of 76kDa)	1.10121	0.587145	0.514061	0.00845428
ST8SIA34		-2.20944	-2.72292	0.513479	0.000970821
ACOT9	Acyl-CoA thioesterase 9	0.657778	0.144392	0.513386	0.00166101
C7orf42	Chromosome 7 open reading frame 42	0.893119	0.379902	0.513217	3.26356e-07
ATF3	Activating transcription factor 3	1.42784	0.915014	0.512823	0.00572264
IL17B	Interleukin 17B	1.01713	0.505031	0.512097	0.00187818
LITAF	Lipopolysaccharide-induced TNF factor	1.01483	0.502788	0.512041	0.00016658
PGM2	Phosphoglucomutase 2	1.54021	1.02824	0.511963	0.00570483
PLCD1	Phospholipase C, delta 1	0.727362	0.215766	0.511596	0.00196663
ST8SIA42		0.937396	0.425887	0.511509	0.00288231
FNDC3B	Fibronectin type III domain containing 3B	1.70852	1.19726	0.511264	0.000162579
C1orf78	Chromosome 1 open reading frame 78	1.61568	1.10479	0.510889	0.0017215
ST8SIA653		1.08142	0.571106	0.510313	0.00416252
CALD1	Caldesmon 1	2.01269	1.50287	0.509824	0.000721957
LIPC	Lipase, hepatic	-0.922962	-1.43271	0.509749	0.0134288
PTPN12	Protein tyrosine phosphatase, non-receptor type 12	1.36944	0.859834	0.509604	1.98945e-05
FAM86A	Family with sequence similarity 86, member A	-0.0774583	-0.586415	0.508957	0.00294792
QPRT	Quinolinate phosphoribosyltransferase (nicotinate-nucleotide pyrophosphorylase (carboxylating))	0.383752	-0.124941	0.508692	0.000444518
KDELR2	KDEL (Lys-Asp-Glu-Leu) endoplasmic reticulum protein retention receptor 2	1.84392	1.33552	0.508394	3.38868e-05
TOMM7	Translocase of outer mitochondrial membrane 7 homolog (yeast)	-0.0636975	-0.572028	0.508331	0.000236981
INTU	Inturned planar cell polarity effector homolog (Drosophila)	-0.248723	-0.756798	0.508075	0.00400198
IMPA2	Inositol(myo)-1(or 4)-monophosphatase 2	0.111465	-0.395817	0.507282	0.0124613
LRRC32	Leucine rich repeat containing 32	0.377492	-0.129653	0.507145	0.000967108
ARMC2	Armadillo repeat containing 2	-0.145109	-0.651932	0.506824	0.000300792
PLCG2	Phospholipase C, gamma 2 (phosphatidylinositol-specific)	0.983357	0.476904	0.506452	0.0127934
IDS	Iduronate 2-sulfatase (Hunter syndrome)	-1.19674	-1.70272	0.505979	0.0121661
ITGA4	Integrin, alpha 4 (antigen CD49D, alpha 4 subunit of VLA-4 receptor)	2.50673	2.00193	0.504804	0.0114817
C10orf59	Chromosome 10 open reading frame 59	-0.195511	-0.699398	0.503886	0.00527267
C1QB	Complement component 1, q subcomponent, B chain	1.35186	0.848058	0.503801	0.00700369
LAMP2	Lysosomal-associated membrane protein 2	1.02316	0.520713	0.502449	4.0888e-05
ASL	Argininosuccinate lyase	0.373179	-0.129196	0.502375	0.000695016
ANLN	Anillin, actin binding protein	-0.736131	-1.23786	0.501728	0.0114821
ZIC5	Zic family member 5 (odd-paired homolog, Drosophila)	-0.120749	-0.622132	0.501383	0.000584407
TWISTNB	TWIST neighbor	0.293761	-0.207155	0.500915	1.30733e-06
ARHGAP15	Rho GTPase activating protein 15	1.6817	1.18104	0.500663	0.00804967
TNFRSF10B	Tumor necrosis factor receptor superfamily, member 10b	1.48087	0.980796	0.500072	0.00213495
ENDOD1	Endonuclease domain containing 1	-0.481368	-0.980731	0.499362	0.0046527
CTSC	Cathepsin C	1.41042	0.911334	0.49909	0.00173953
CCR1	Chemokine (C-C motif) receptor 1	0.670987	0.172449	0.498538	0.00875791
EVI1	Ecotropic viral integration site 1	1.0425	0.544104	0.498396	0.00291452
SPATA17	Spermatogenesis associated 17	1.21591	0.717666	0.498241	0.00306476
DKFZP564J0863	DKFZP564J0863 protein	1.49724	0.999507	0.49773	0.00110099
EREG	Epiregulin	0.550947	0.0533549	0.497592	0.00708364
MGC7036		0.0832948	-0.414103	0.497398	0.00249566
GCKR	Glucokinase (hexokinase 4) regulator	0.0139592	-0.483049	0.497008	0.00336827
C7orf24	Chromosome 7 open reading frame 24	-0.244916	-0.741432	0.496516	3.97884e-05
SAR1B	SAR1 gene homolog B (S. cerevisiae)	1.05837	0.562315	0.496059	0.00195857
DENND3	DENN/MADD domain containing 3	-0.0871878	-0.582755	0.495567	0.0073193
CST7	Cystatin F (leukocystatin)	1.44899	0.953784	0.495207	0.000460701
IFRD1	Interferon-related developmental regulator 1	1.62966	1.13461	0.495043	0.000136469
HIST1H2AJ	Histone cluster 1, H2aj	1.25357	0.75864	0.494932	0.000125125
GBAS	Glioblastoma amplified sequence	0.916897	0.422256	0.494641	0.00523525
KIAA0895	KIAA0895 protein	-0.158079	-0.652026	0.493947	0.00367976
INPP4B	Inositol polyphosphate-4-phosphatase, type II, 105kDa	-0.921663	-1.41429	0.492627	0.000178988
LILRA2		0.735261	0.242953	0.492308	0.0095062
ST8SIA111		-0.690054	-1.18225	0.492193	0.00504113
ACSL1	Acyl-CoA synthetase long-chain family member 1	0.141869	-0.35028	0.492149	0.00187807
MRC2	Mannose receptor, C type 2	1.11357	0.621652	0.491923	0.000104432
NOD1	Nucleotide-binding oligomerization domain containing 1	1.21083	0.719202	0.491628	0.000195478
LGALS12	Lectin, galactoside-binding, soluble, 12 (galectin 12)	0.409188	-0.081353	0.490541	0.000500193
FXC1	Fracture callus 1 homolog (rat)	-0.33323	-0.823565	0.490335	0.000887015
SCPEP1	Serine carboxypeptidase 1	0.66604	0.175964	0.490077	0.00225442
CA5B	Carbonic anhydrase VB, mitochondrial	0.233574	-0.256199	0.489773	1.3762e-05
C4orf32	Chromosome 4 open reading frame 32	-0.787023	-1.27665	0.489627	0.000296625
GCLM	Glutamate-cysteine ligase, modifier subunit	0.198001	-0.291535	0.489536	0.000170198
C6orf97	Chromosome 6 open reading frame 97	0.621786	0.132278	0.489507	0.0111605
TRAF1	TNF receptor-associated factor 1	0.2119	-0.276796	0.488696	0.00134403
FCER1G	Fc fragment of IgE, high affinity I, receptor for; gamma polypeptide	1.23842	0.749884	0.488532	0.0054759
C3AR1	Complement component 3a receptor 1	0.997196	0.509748	0.487449	0.0124288
RELL1	RELT-like 1	1.80492	1.31802	0.486906	0.000222549
WTAP	Wilms tumor 1 associated protein	0.845291	0.358681	0.486611	0.000213824
CLIC4	Chloride intracellular channel 4	2.48973	2.00331	0.486424	0.00474838
BTBD16	BTB (POZ) domain containing 16	-1.72671	-2.21298	0.486275	0.00746952
IL1RL1	Interleukin 1 receptor-like 1	0.482407	-0.0035353	0.485942	0.00382182
SLAMF1	Signaling lymphocytic activation molecule family member 1	0.169557	-0.315763	0.485321	1.54242e-07
SHFM1	Split hand/foot malformation (ectrodactyly) type 1	0.927754	0.443682	0.484072	6.37829e-05
C1QTNF2	C1q and tumor necrosis factor related protein 2	0.247908	-0.235136	0.483045	0.0058059
GLB1	Galactosidase, beta 1	0.611727	0.129166	0.482561	1.67219e-06
ZNF683	Zinc finger protein 683	0.748792	0.266834	0.481959	0.0110479
RAET1G	Retinoic acid early transcript 1G	-0.592515	-1.07359	0.481074	0.00120916
ST8SIA844		0.36181	-0.119224	0.481034	0.000828355
SPA17	Sperm autoantigenic protein 17	0.236911	-0.244091	0.481002	0.00261199
EDG3	Endothelial differentiation, sphingolipid G-protein-coupled receptor, 3	1.33022	0.849828	0.480388	0.000438723
SNX13	Sorting nexin 13	0.901301	0.421202	0.480099	4.29405e-05
DPEP2	Dipeptidase 2	0.902289	0.422308	0.479981	0.00921361
C13orf29	Chromosome 13 open reading frame 29	0.50941	0.0294803	0.47993	0.00234401
SALL4	Sal-like 4 (Drosophila)	0.680966	0.202212	0.478753	0.0074403
RHOD	Ras homolog gene family, member D	0.803403	0.324875	0.478529	0.0104097
IKIP	IKK interacting protein	2.06679	1.5888	0.477992	0.00243932
TRAF3IP3	TRAF3 interacting protein 3	1.03114	0.553189	0.477947	0.00366217
PSCD4	Pleckstrin homology, Sec7 and coiled-coil domains 4	1.06509	0.587934	0.477159	0.00532429
AK7	Adenylate kinase 7	-1.12524	-1.60155	0.476309	0.00439774
RGR	Retinal G protein coupled receptor	1.10198	0.626085	0.475899	0.00273435
ST8SIA891		0.830813	0.355743	0.47507	0.000120809
SLC39A4	Solute carrier family 39 (zinc transporter), member 4	-0.70265	-1.17735	0.474699	0.00787028
IL4R	Interleukin 4 receptor	0.638878	0.164518	0.47436	0.00116957
LIMK2	LIM domain kinase 2	0.387815	-0.0861136	0.473928	0.000511187
RABL5	RAB, member RAS oncogene family-like 5	0.0833628	-0.390488	0.473851	5.23215e-05
FAM139A	Family with sequence similarity 139, member A	0.803865	0.331066	0.472799	0.00291394
TNFSF14	Tumor necrosis factor (ligand) superfamily, member 14	0.166841	-0.305716	0.472557	0.00120984
DEF6	Differentially expressed in FDCP 6 homolog (mouse)	0.793629	0.321598	0.472031	0.0059465
BMP2K	BMP2 inducible kinase	0.682387	0.211017	0.47137	0.000425036
KLF10	Kruppel-like factor 10	0.407029	-0.0637168	0.470746	0.0114572
SFT2D2	SFT2 domain containing 2	1.359	0.888383	0.470616	0.000102196
CFLAR	CASP8 and FADD-like apoptosis regulator	0.990119	0.51975	0.470369	0.00023815
CLCN5	Chloride channel 5 (nephrolithiasis 2, X-linked, Dent disease)	1.04566	0.575902	0.469761	6.98491e-05
CEACAM4	Carcinoembryonic antigen-related cell adhesion molecule 4	0.715948	0.24647	0.469478	0.000184649
FOLR3	Folate receptor 3 (gamma)	0.784882	0.315527	0.469355	0.00175301
TP63	Tumor protein p63	0.683638	0.214567	0.46907	8.29579e-07
NDUFA4L2	NADH dehydrogenase (ubiquinone) 1 alpha subcomplex, 4-like 2	1.55732	1.08861	0.468715	0.00907862
LOC202459	Similar to RIKEN cDNA 2310008M10	1.1868	0.718319	0.468485	0.00333959
PDIA4	Protein disulfide isomerase family A, member 4	2.14414	1.67609	0.46805	0.000354446
CNN3	Calponin 3, acidic	1.79827	1.33038	0.467887	0.00995507
SERTAD3	SERTA domain containing 3	0.90503	0.438514	0.466515	0.00019558
CSDA	Cold shock domain protein A	1.69309	1.22662	0.466466	0.0117501
ST8SIA800		0.0684065	-0.398013	0.466419	0.00516899
PSMB10	Proteasome (prosome, macropain) subunit, beta type, 10	0.447907	-0.0182811	0.466188	0.00848622
RRAS2	Related RAS viral (r-ras) oncogene homolog 2	0.788353	0.322179	0.466174	0.0114525
F2RL2	Coagulation factor II (thrombin) receptor-like 2	1.02406	0.558239	0.465825	0.000618603
RNF149	Ring finger protein 149	0.0937605	-0.371833	0.465594	0.00976706
C9orf21	Chromosome 9 open reading frame 21	1.24624	0.780729	0.46551	0.000240697
DCBLD1	Discoidin, CUB and LCCL domain containing 1	0.549884	0.0844369	0.465447	0.0004571
CHCHD7	Coiled-coil-helix-coiled-coil-helix domain containing 7	0.278874	-0.186346	0.46522	0.00192654
NOPE	Neighbor of Punc E11	0.8709	0.406001	0.464898	0.00920128
C20orf175	Chromosome 20 open reading frame 175	1.00309	0.538625	0.464462	0.00123344
MAN1A1	Mannosidase, alpha, class 1A, member 1	-0.136831	-0.600974	0.464143	0.0012042
COMMD8	COMM domain containing 8	0.42423	-0.0395973	0.463828	0.0137465
RAB31	RAB31, member RAS oncogene family	1.00351	0.539782	0.463729	0.00590246
PLB1	Phospholipase B1	0.37692	-0.0864801	0.4634	0.00596732
DTX3L	Deltex 3-like (Drosophila)	1.88628	1.42289	0.463389	0.008469
CREB3L2	CAMP responsive element binding protein 3-like 2	1.13645	0.673225	0.463226	0.000138718
LOC90835	Hypothetical protein LOC90835	-0.406721	-0.869729	0.463007	0.00154886
SELENBP1	Selenium binding protein 1	-0.87296	-1.33583	0.462866	3.82288e-05
UBE2H	Ubiquitin-conjugating enzyme E2H (UBC8 homolog, yeast)	1.0518	0.589224	0.46258	3.99883e-05
MAF	V-maf musculoaponeurotic fibrosarcoma oncogene homolog (avian)	0.111124	-0.350837	0.461961	0.0137499
QPCT	Glutaminyl-peptide cyclotransferase (glutaminyl cyclase)	-1.08596	-1.54784	0.46188	0.0114519
RCN1	Reticulocalbin 1, EF-hand calcium binding domain	1.45274	0.991468	0.461268	0.00397012
ADPRH	ADP-ribosylarginine hydrolase	1.09246	0.631614	0.46085	0.000468754
RAB20	RAB20, member RAS oncogene family	1.60904	1.1482	0.460842	0.014289
UNQ501	MBC3205	0.0248364	-0.435982	0.460818	0.00177628
LAMB2	Laminin, beta 2 (laminin S)	1.56659	1.10732	0.459272	0.00939835
ST8SIA215		-0.0244397	-0.483617	0.459177	7.41005e-05
SLC2A14		-0.669756	-1.12884	0.45908	1.49168e-06
ST8SIA896		1.55736	1.09829	0.459071	0.0115212
YKT6	YKT6 v-SNARE homolog (S. cerevisiae)	0.660287	0.201776	0.45851	0.000104609
FAM86B1	Family with sequence similarity 86, member B1	1.0207	0.56241	0.458292	6.37742e-05
DNAJB9	DnaJ (Hsp40) homolog, subfamily B, member 9	0.14564	-0.311791	0.457432	0.00473166
PRKAA1	Protein kinase, AMP-activated, alpha 1 catalytic subunit	1.18213	0.724857	0.457272	1.02915e-05
MLKL	Mixed lineage kinase domain-like	0.899999	0.443098	0.456902	0.00476466
ST8SIA758		0.640413	0.183648	0.456765	0.000148468
PLD1	Phospholipase D1, phosphatidylcholine-specific	-0.0485437	-0.504824	0.45628	0.00561281
TRPM3	Transient receptor potential cation channel, subfamily M, member 3	-0.153712	-0.609761	0.456049	0.00204466
CHMP4C	Chromatin modifying protein 4C	0.0662314	-0.389758	0.455989	0.00398459
PALMD	Palmdelphin	0.402681	-0.0531936	0.455875	0.00100117
ST8SIA551		0.711568	0.256654	0.454914	0.0112974
ST8SIA85		0.245447	-0.209385	0.454832	0.000496261
RHBDD2	Rhomboid domain containing 2	-0.838528	-1.29327	0.454739	0.000872783
CPA6	Carboxypeptidase A6	0.948905	0.494214	0.454691	0.00716406
CMAH	Cytidine monophosphate-N-acetylneuraminic acid hydroxylase (CMP-N-acetylneuraminate monooxygenase)	0.57521	0.121112	0.454098	0.0081448
C11orf45	Chromosome 11 open reading frame 45	0.27895	-0.174305	0.453255	0.00701342
TPK1	Thiamin pyrophosphokinase 1	-0.302719	-0.755523	0.452804	0.00338746
NQO2	NAD(P)H dehydrogenase, quinone 2	-0.329996	-0.782731	0.452735	0.00143916
ST8SIA498		1.09637	0.643765	0.452608	0.00125488
DENND1C	DENN/MADD domain containing 1C	0.177572	-0.274962	0.452534	0.0049647
SH2D2A	SH2 domain protein 2A	-0.0241804	-0.476515	0.452334	0.00630766
NCKAP1L	NCK-associated protein 1-like	1.44734	0.995274	0.452071	0.0132083
CYP27A1	Cytochrome P450, family 27, subfamily A, polypeptide 1	0.52805	0.0763378	0.451712	0.00189189
FCGR1A	Fc fragment of IgG, high affinity Ia, receptor (CD64)	0.700226	0.248583	0.451644	0.0130201
ST8SIA822		1.04754	0.596762	0.450775	0.0051286
C2orf12		1.30063	0.850838	0.449793	0.00953025
LRRC61	Leucine rich repeat containing 61	-0.739257	-1.18862	0.449365	0.00210819
C1orf113	Chromosome 1 open reading frame 113	0.789062	0.339776	0.449286	0.00235228
C21orf13	Chromosome 21 open reading frame 13	0.865288	0.416318	0.44897	0.00970002
CCDC3		-0.925997	-1.37492	0.448923	0.00498278
GSTM1	Glutathione S-transferase M1	-0.446238	-0.894214	0.447977	0.0126778
RCSD1	RCSD domain containing 1	0.972023	0.524068	0.447955	0.00903224
C20orf195	Chromosome 20 open reading frame 195	-0.13665	-0.584497	0.447848	0.000731057
VASP	Vasodilator-stimulated phosphoprotein	1.00341	0.555617	0.447788	0.00529628
LMNA	Lamin A/C	1.32963	0.882743	0.446886	0.0102535
OR51E1	Olfactory receptor, family 51, subfamily E, member 1	0.582126	0.135265	0.446861	0.00706283
SLC35F5	Solute carrier family 35, member F5	1.41258	0.965731	0.446852	0.000413317
SNX9	Sorting nexin 9	0.193347	-0.253229	0.446576	0.000195324
TRADD	TNFRSF1A-associated via death domain	0.685547	0.239016	0.446531	0.000138151
LHFPL2	Lipoma HMGIC fusion partner-like 2	0.844904	0.39868	0.446224	0.0010992
PAK1	P21/Cdc42/Rac1-activated kinase 1 (STE20 homolog, yeast)	-1.63032	-2.07633	0.446016	0.00239855
CD164	CD164 molecule, sialomucin	0.932017	0.486206	0.445812	0.000745165
GNGT2	Guanine nucleotide binding protein (G protein), gamma transducing activity polypeptide 2	1.49078	1.045	0.445773	0.0052234
LEPROT		0.313782	-0.131652	0.445434	0.00511919
MFSD1	Major facilitator superfamily domain containing 1	1.2979	0.852778	0.445117	0.00028067
AHNAK	AHNAK nucleoprotein	0.300986	-0.143558	0.444544	0.00949864
SLC39A14	Solute carrier family 39 (zinc transporter), member 14	1.189	0.744562	0.444435	0.0011363
C7orf31	Chromosome 7 open reading frame 31	0.957612	0.513178	0.444434	0.00421062
PTGER1	Prostaglandin E receptor 1 (subtype EP1), 42kDa	0.160294	-0.283518	0.443813	0.00322714
PRR15	Proline rich 15	0.337804	-0.105757	0.443561	0.00195741
SKAP1	Src kinase associated phosphoprotein 1	-0.217414	-0.660504	0.44309	0.01208
C1orf85	Chromosome 1 open reading frame 85	0.950827	0.508615	0.442213	0.00342076
ZAK	Sterile alpha motif and leucine zipper containing kinase AZK	1.4087	0.966548	0.442147	0.00129496
LRGUK	Leucine-rich repeats and guanylate kinase domain containing	1.1981	0.756732	0.44137	0.000885391
SLC16A12	Solute carrier family 16, member 12 (monocarboxylic acid transporter 12)	-0.323943	-0.765212	0.441269	0.00546281
CUL7	Cullin 7	-0.051364	-0.491671	0.440307	0.00132749
RBM33	RNA binding motif protein 33	0.497435	0.0576485	0.439786	7.08713e-05
MRPL17	Mitochondrial ribosomal protein L17	0.388616	-0.0504798	0.439096	0.00225436
JUNB	Jun B proto-oncogene	0.523807	0.0851499	0.438657	0.0128038
NKG7	Natural killer cell group 7 sequence	0.715302	0.276672	0.438629	0.00023628
NEDD9	Neural precursor cell expressed, developmentally down-regulated 9	0.917843	0.479665	0.438178	0.00355145
HAO1	Hydroxyacid oxidase (glycolate oxidase) 1	0.409374	-0.0285583	0.437932	2.3045e-06
SLC22A16	Solute carrier family 22 (organic cation transporter), member 16	0.47285	0.0351273	0.437722	0.00476395
SSR3	Signal sequence receptor, gamma (translocon-associated protein gamma)	0.877685	0.440109	0.437575	0.000123171
C21orf96	Chromosome 21 open reading frame 96	-0.0206372	-0.457592	0.436955	0.00572168
CMTM7	CKLF-like MARVEL transmembrane domain containing 7	1.09792	0.661189	0.436733	0.00932883
GRPEL2	GrpE-like 2, mitochondrial (E. coli)	0.438979	0.00238282	0.436596	0.00201497
NOTCH3	Notch homolog 3 (Drosophila)	1.02583	0.589593	0.436233	0.00151871
RASSF8	Ras association (RalGDS/AF-6) domain family 8	0.362726	-0.0733943	0.436121	0.00378617
CIB1	Calcium and integrin binding 1 (calmyrin)	0.752308	0.316514	0.435794	0.000634757
ARHGDIB	Rho GDP dissociation inhibitor (GDI) beta	1.47301	1.038	0.435005	0.0145507
KIAA0241	KIAA0241	0.0220032	-0.412813	0.434816	2.97676e-05
ST8SIA203		0.727485	0.292869	0.434616	0.00166171
CHCHD2	Coiled-coil-helix-coiled-coil-helix domain containing 2	0.309516	-0.124761	0.434277	0.00748306
HSPA5	Heat shock 70kDa protein 5 (glucose-regulated protein, 78kDa)	0.762934	0.328857	0.434076	0.000815352
TNFSF12		-0.61304	-1.04687	0.433831	0.00839328
MAP1B	Microtubule-associated protein 1B	-1.11749	-1.55099	0.433493	0.0083555
SLC17A3	Solute carrier family 17 (sodium phosphate), member 3	0.367096	-0.0659796	0.433076	0.000509514
C5AR1	Complement component 5a receptor 1	0.817964	0.38498	0.432984	0.00428035
MAG1	Lung cancer metastasis-associated protein	-0.897054	-1.32987	0.432817	0.0111167
SERPINH1	Serpin peptidase inhibitor, clade H (heat shock protein 47), member 1, (collagen binding protein 1)	1.547	1.11424	0.432755	0.00689172
PLOD3	Procollagen-lysine, 2-oxoglutarate 5-dioxygenase 3	1.25452	0.821782	0.432741	0.000473659
WFDC3	WAP four-disulfide core domain 3	0.149319	-0.283089	0.432407	0.00107842
LOC401397	Hypothetical LOC401397	1.10061	0.668562	0.432051	0.000913461
WARS2	Tryptophanyl tRNA synthetase 2, mitochondrial	1.15543	0.723632	0.431801	0.000461756
FAM113B	Family with sequence similarity 113, member B	0.756311	0.324799	0.431512	0.0106182
MGC40499		1.73413	1.30266	0.43147	0.000128293
ST8SIA868		-0.299734	-0.731108	0.431374	0.0065165
CCDC96	Coiled-coil domain containing 96	-0.409343	-0.839917	0.430574	0.000703303
FGFR1OP	FGFR1 oncogene partner	1.22573	0.795171	0.430556	0.00934263
LPP	LIM domain containing preferred translocation partner in lipoma	0.90402	0.473684	0.430336	0.000529315
CELSR1	Cadherin, EGF LAG seven-pass G-type receptor 1 (flamingo homolog, Drosophila)	1.15656	0.726514	0.430044	0.00792959
ST8SIA6	ST8 alpha-N-acetyl-neuraminide alpha-2,8-sialyltransferase 6	1.64629	1.2166	0.429691	0.0139879
ST8SIA899		1.46307	1.03464	0.42843	0.0107636
SLC2A10	Solute carrier family 2 (facilitated glucose transporter), member 10	0.417308	-0.0107549	0.428063	0.000127377
TRPM2	Transient receptor potential cation channel, subfamily M, member 2	-0.77184	-1.19978	0.427942	0.00469112
ZP1	Zona pellucida glycoprotein 1 (sperm receptor)	-0.0438256	-0.471746	0.42792	0.01154
PPM1J	Protein phosphatase 1J (PP2C domain containing)	-1.48077	-1.90854	0.427769	0.00197651
MGC33212		-0.393119	-0.820578	0.42746	0.00437697
VKORC1L1	Vitamin K epoxide reductase complex, subunit 1-like 1	0.00935598	-0.417971	0.427327	5.97708e-05
RRAGC	Ras-related GTP binding C	0.437163	0.00993604	0.427227	5.11043e-05
LNPEP	Leucyl/cystinyl aminopeptidase	0.735282	0.308061	0.427221	5.2029e-05
KIAA0409	KIAA0409	0.840022	0.412949	0.427073	0.000730827
TPM4	Tropomyosin 4	1.20602	0.779385	0.42664	0.00205634
ANTXR2	Anthrax toxin receptor 2	1.47219	1.04586	0.426333	0.00269138
SERHL	Serine hydrolase-like	-0.292983	-0.719292	0.426309	0.00321956
CHN2	Chimerin (chimaerin) 2	-1.16991	-1.59608	0.426169	0.00677336
ACP6	Acid phosphatase 6, lysophosphatidic	0.882004	0.456056	0.425947	0.00233851
TRIM14	Tripartite motif-containing 14	1.00854	0.582694	0.425848	0.000271705
COX7A1	Cytochrome c oxidase subunit VIIa polypeptide 1 (muscle)	0.116781	-0.309011	0.425793	0.0118813
LRRC8E	Leucine rich repeat containing 8 family, member E	0.221886	-0.203753	0.425639	0.0110364
FLJ20699	Hypothetical protein FLJ20699	1.10363	0.678037	0.42559	0.00460808
MYH9	Myosin, heavy chain 9, non-muscle	0.71443	0.28971	0.42472	0.00501444
SMPD1	Sphingomyelin phosphodiesterase 1, acid lysosomal (acid sphingomyelinase)	0.0514445	-0.372318	0.423762	0.000734497
PMS2L11		0.547128	0.123722	0.423406	0.000255523
LRP2	Low density lipoprotein-related protein 2	-0.71868	-1.14196	0.423285	0.00465182
KLHDC7B	Kelch domain containing 7B	0.415048	-0.00771622	0.422765	0.00732023
HFE	Hemochromatosis	0.421359	-0.00126565	0.422624	5.81217e-05
SQSTM1	Sequestosome 1	0.474083	0.0519922	0.422091	0.00535775
MANBA	Mannosidase, beta A, lysosomal	0.753468	0.332303	0.421165	0.00646498
GGCX	Gamma-glutamyl carboxylase	0.471443	0.0504177	0.421025	8.10807e-05
ST8SIA735		0.850949	0.430564	0.420385	0.00182146
HK3	Hexokinase 3 (white cell)	0.805145	0.385474	0.419672	0.000184648
FLJ21062	Hypothetical protein FLJ21062	0.396548	-0.0227351	0.419283	0.0112073
PLEKHQ1		0.064466	-0.354792	0.419258	0.00371383
DNMT3A	DNA (cytosine-5-)-methyltransferase 3 alpha	0.827439	0.409044	0.418394	0.00668831
LSM5	LSM5 homolog, U6 small nuclear RNA associated (S. cerevisiae)	1.23116	0.812836	0.418321	0.000168623
MFSD8	Major facilitator superfamily domain containing 8	0.34932	-0.0689876	0.418307	0.000920438
PMS2L5	Postmeiotic segregation increased 2-like 5	0.612002	0.193729	0.418273	0.000251922
PRDM1	PR domain containing 1, with ZNF domain	0.750524	0.333011	0.417513	0.000707252
SPCS3	Signal peptidase complex subunit 3 homolog (S. cerevisiae)	1.03399	0.616833	0.417158	0.00996193
RCN3	Reticulocalbin 3, EF-hand calcium binding domain	1.08374	0.666675	0.417066	0.00376458
MOSPD2	Motile sperm domain containing 2	0.302138	-0.114212	0.41635	0.000514415
MYADM	Myeloid-associated differentiation marker	-0.345211	-0.760891	0.415681	4.99007e-05
PLAGL1	Pleiomorphic adenoma gene-like 1	-0.207531	-0.622637	0.415106	0.00116126
RABGAP1L	RAB GTPase activating protein 1-like	0.336575	-0.0785165	0.415092	0.00192629
PDCD1LG2	Programmed cell death 1 ligand 2	0.958713	0.543771	0.414943	0.00160937
ADAM9	ADAM metallopeptidase domain 9 (meltrin gamma)	1.65603	1.24126	0.41477	0.0047005
C6	Complement component 6	0.207169	-0.207256	0.414425	0.011762
ENOX2	Ecto-NOX disulfide-thiol exchanger 2	0.28845	-0.12478	0.41323	0.0014727
TPP1	Tripeptidyl peptidase I	0.508668	0.0955986	0.413069	0.0117811
LOC200810	Similar to beta-1,4-mannosyltransferase; beta-1,4 mannosyltransferase	0.469885	0.0572502	0.412635	0.00368258
TRAF3	TNF receptor-associated factor 3	-1.0678	-1.48031	0.412516	0.000403335
PSMC2	Proteasome (prosome, macropain) 26S subunit, ATPase, 2	0.536419	0.124007	0.412412	1.9642e-05
CSF3	Colony stimulating factor 3 (granulocyte)	0.0640902	-0.348003	0.412093	0.000621409
FBXL13	F-box and leucine-rich repeat protein 13	-0.0998699	-0.511759	0.411889	4.32052e-05
DC2	DC2 protein	1.30467	0.892853	0.411812	0.0130002
MYO1F	Myosin IF	1.22417	0.812784	0.411386	0.00613197
FOXC1	Forkhead box C1	-0.0535309	-0.46462	0.411089	0.0111934
PPAP2A	Phosphatidic acid phosphatase type 2A	0.221573	-0.189273	0.410846	0.00652741
LSP1	Lymphocyte-specific protein 1	0.688972	0.278305	0.410667	0.00128329
B3GNT2	UDP-GlcNAc:betaGal beta-1,3-N-acetylglucosaminyltransferase 2	-0.716781	-1.12727	0.410487	0.0086832
UBB	Ubiquitin B	-0.251579	-0.661904	0.410325	0.00871417
CHSY1	Carbohydrate (chondroitin) synthase 1	0.87687	0.467372	0.409498	0.00312225
EFNA4	Ephrin-A4	1.25682	0.84744	0.409382	0.00463677
RSPH3	Radial spoke head 3 homolog (Chlamydomonas)	-0.0770976	-0.48643	0.409332	0.00417717
ST8SIA819		-0.769603	-1.17867	0.409068	0.013375
ASB9	Ankyrin repeat and SOCS box-containing 9	0.696808	0.288018	0.40879	0.00437506
RAC2	Ras-related C3 botulinum toxin substrate 2 (rho family, small GTP binding protein Rac2)	0.77207	0.363328	0.408742	0.00365485
GALNT2	UDP-N-acetyl-alpha-D-galactosamine:polypeptide N-acetylgalactosaminyltransferase 2 (GalNAc-T2)	0.830894	0.422248	0.408647	0.00118479
CSTB	Cystatin B (stefin B)	0.484125	0.0762516	0.407874	2.5667e-05
CCNYL1	Cyclin Y-like 1	0.0507079	-0.356883	0.407591	0.00105215
UBE2D4	Ubiquitin-conjugating enzyme E2D 4 (putative)	0.467166	0.0598703	0.407296	0.00192221
ARL11	ADP-ribosylation factor-like 11	1.35887	0.951593	0.407277	0.0075208
ST8SIA645		1.42208	1.01494	0.407142	0.00169339
C3orf52	Chromosome 3 open reading frame 52	-0.110844	-0.517315	0.406472	0.0102084
BACE1	Beta-site APP-cleaving enzyme 1	-0.616658	-1.02289	0.406233	0.00392022
TSPO	Translocator protein (18kDa)	1.22921	0.823494	0.405712	0.00812468
HORMAD2	HORMA domain containing 2	0.235764	-0.169837	0.405601	0.000501421
ERO1LB	ERO1-like beta (S. cerevisiae)	0.794384	0.389242	0.405142	0.000447169
ZNF780B	Zinc finger protein 780B	0.481254	0.0762049	0.405049	0.00190593
MORN2	MORN repeat containing 2	0.21019	-0.19461	0.404799	0.00799486
ST8SIA476		0.540018	0.135312	0.404705	0.00147894
ST8SIA458		1.7737	1.36925	0.404451	0.0115333
POLD4	Polymerase (DNA-directed), delta 4	0.753702	0.349679	0.404023	0.000767088
URP2	UNC-112 related protein 2	1.38381	0.979793	0.404018	0.0137282
IL18R1	Interleukin 18 receptor 1	0.209948	-0.194022	0.40397	0.00189405
PTPN2	Protein tyrosine phosphatase, non-receptor type 2	0.747453	0.344137	0.403316	0.0003913
CXorf38	Chromosome X open reading frame 38	1.38492	0.981968	0.402947	0.00019087
SAA3P	Serum amyloid A3 pseudogene	0.256018	-0.146673	0.402691	3.10655e-05
ELMOD2	ELMO/CED-12 domain containing 2	1.06549	0.66389	0.401598	0.000235389
SDCBP	Syndecan binding protein (syntenin)	0.825199	0.42365	0.401549	0.000192455
MXRA7	Matrix-remodelling associated 7	-0.392375	-0.793915	0.40154	0.00182633
HLCS	Holocarboxylase synthetase (biotin-(proprionyl-Coenzyme A-carboxylase (ATP-hydrolysing)) ligase)	0.15999	-0.241245	0.401235	0.000196424
ATP6AP2	ATPase, H+ transporting, lysosomal accessory protein 2	-0.336305	-0.736931	0.400626	0.00385998
FXYD5	FXYD domain containing ion transport regulator 5	1.03318	0.63322	0.399963	0.00445839
CLDN11	Claudin 11 (oligodendrocyte transmembrane protein)	-0.700844	-1.10014	0.399293	0.00518966
CD274	CD274 molecule	0.058402	-0.340852	0.399254	0.00458737
KCNE1	Potassium voltage-gated channel, Isk-related family, member 1	0.196757	-0.20234	0.399097	0.000280304
MID2	Midline 2	-0.137815	-0.536694	0.398879	0.00240831
ST8SIA4	ST8 alpha-N-acetyl-neuraminide alpha-2,8-sialyltransferase 4	1.20055	0.801984	0.398564	0.00099162
ABHD5	Abhydrolase domain containing 5	1.25669	0.858224	0.398463	0.000464817
ATP6V0E1	ATPase, H+ transporting, lysosomal 9kDa, V0 subunit e1	1.57337	1.17524	0.398132	0.0011785
VENTX	VENT homeobox homolog (Xenopus laevis)	0.492071	0.0939486	0.398122	0.000371381
INVS	Inversin	0.793678	0.395864	0.397814	0.00107301
NDUFB2	NADH dehydrogenase (ubiquinone) 1 beta subcomplex, 2, 8kDa	0.0963485	-0.300766	0.397114	0.00119461
RRM2B	Ribonucleotide reductase M2 B (TP53 inducible)	0.501613	0.104517	0.397096	0.0117356
RTCD1	RNA terminal phosphate cyclase domain 1	-0.130332	-0.527176	0.396844	0.00079912
C18orf17	Chromosome 18 open reading frame 17	0.835679	0.438983	0.396696	0.00820868
C21orf88	Chromosome 21 open reading frame 88	0.0898126	-0.306428	0.39624	0.0057207
PARVA	Parvin, alpha	0.035777	-0.359607	0.395384	0.00357932
MAFF	V-maf musculoaponeurotic fibrosarcoma oncogene homolog F (avian)	0.717408	0.322979	0.394429	0.00879356
XCL2	Chemokine (C motif) ligand 2	0.161862	-0.232292	0.394154	0.011706
ST8SIA902		-0.838934	-1.23307	0.394135	0.00394209
NEURL2	Neuralized homolog 2 (Drosophila)	0.439776	0.0458099	0.393966	0.00205201
ITGA5	Integrin, alpha 5 (fibronectin receptor, alpha polypeptide)	1.00418	0.611244	0.392938	0.00519794
MRPS33	Mitochondrial ribosomal protein S33	0.561063	0.168149	0.392915	0.00420747
BICD1	Bicaudal D homolog 1 (Drosophila)	0.265694	-0.127107	0.392801	0.0100086
FLJ13236	Hypothetical protein FLJ13236	0.120674	-0.271486	0.392159	0.00383253
CAV3	Caveolin 3	0.189677	-0.202402	0.392079	0.000169903
MYO1E	Myosin IE	1.05283	0.661116	0.391712	0.00928465
PLXNC1	Plexin C1	-0.0597852	-0.451413	0.391627	0.0090397
ITPKC	Inositol 1,4,5-trisphosphate 3-kinase C	0.698507	0.307025	0.391482	0.00382699
RABGEF1	RAB guanine nucleotide exchange factor (GEF) 1	0.167788	-0.223536	0.391324	7.34048e-05
CHMP2A	Chromatin modifying protein 2A	0.304833	-0.0860535	0.390886	0.0031118
CA13	Carbonic anhydrase XIII	0.540317	0.150291	0.390026	0.000161929
ST8SIA385		0.667326	0.277477	0.389848	0.000133957
SNX21	Sorting nexin family member 21	-0.344514	-0.734319	0.389805	0.00804502
LYN	V-yes-1 Yamaguchi sarcoma viral related oncogene homolog	0.599257	0.209535	0.389722	0.00211376
C6orf128	Chromosome 6 open reading frame 128	0.588941	0.199253	0.389687	0.0144943
UBE3C	Ubiquitin protein ligase E3C	0.719364	0.330018	0.389346	2.93367e-05
SIGLEC7	Sialic acid binding Ig-like lectin 7	1.85471	1.46542	0.389289	0.014548
OAZ3	Ornithine decarboxylase antizyme 3	0.184304	-0.204718	0.389022	0.00504015
MOBKL1B	MOB1, Mps One Binder kinase activator-like 1B (yeast)	1.40325	1.01509	0.388166	0.00566083
ST8SIA454		0.180987	-0.205763	0.38675	0.00103776
JAZF1	JAZF zinc finger 1	-0.37713	-0.76364	0.386509	0.00102935
OLFML2A	Olfactomedin-like 2A	0.622153	0.235713	0.38644	0.000516851
ARL1	ADP-ribosylation factor-like 1	0.225672	-0.160357	0.386029	7.58177e-05
PIGB	Phosphatidylinositol glycan anchor biosynthesis, class B	0.395715	0.0101784	0.385537	0.0101101
LZTFL1	Leucine zipper transcription factor-like 1	-0.415629	-0.800543	0.384914	0.00600909
MCAM	Melanoma cell adhesion molecule	0.893265	0.508637	0.384628	0.0130226
ST8SIA563		0.785902	0.401543	0.384358	0.00382878
C12orf49	Chromosome 12 open reading frame 49	0.580556	0.196251	0.384304	0.0015131
C9orf40	Chromosome 9 open reading frame 40	-0.588991	-0.973179	0.384187	0.0110615
HSPB6	Heat shock protein, alpha-crystallin-related, B6	0.332255	-0.0519011	0.384156	0.000313772
KCTD9	Potassium channel tetramerisation domain containing 9	0.15083	-0.232917	0.383747	0.00144683
RDH12	Retinol dehydrogenase 12 (all-trans/9-cis/11-cis)	-0.768825	-1.15239	0.383566	0.000105326
ARHGEF3	Rho guanine nucleotide exchange factor (GEF) 3	-0.533381	-0.916313	0.382932	0.00531801
DLD	Dihydrolipoamide dehydrogenase	0.0498609	-0.332868	0.382729	0.00301195
LRRCC1	Leucine rich repeat and coiled-coil domain containing 1	1.45259	1.07016	0.382425	0.00451961
ARPC3	Actin related protein 2/3 complex, subunit 3, 21kDa	0.211319	-0.171056	0.382375	0.000481547
ST8SIA814		1.87805	1.49588	0.382167	0.0128695
ST8SIA115		-0.13084	-0.512929	0.382089	0.00330921
GATAD1	GATA zinc finger domain containing 1	0.958766	0.576694	0.382072	0.00115357
POR	P450 (cytochrome) oxidoreductase	0.185909	-0.194897	0.380806	0.000130831
ST8SIA554		0.613523	0.233149	0.380374	0.00261411
41159		0.0349836	-0.344637	0.37962	0.00219186
XBP1	X-box binding protein 1	0.874289	0.494729	0.379559	0.00652466
RIPK1	Receptor (TNFRSF)-interacting serine-threonine kinase 1	1.32081	0.94159	0.379221	0.00359154
FGF18	Fibroblast growth factor 18	-1.05634	-1.4354	0.379062	0.00549362
CACNA2D4	Calcium channel, voltage-dependent, alpha 2/delta subunit 4	0.763512	0.384682	0.37883	0.00734402
ZNF185	Zinc finger protein 185 (LIM domain)	0.0878209	-0.290643	0.378464	0.00112431
DERL2	Der1-like domain family, member 2	1.04074	0.662284	0.378461	0.000153323
CD83	CD83 molecule	-1.09424	-1.47222	0.377975	0.0116485
CD300A	CD300a molecule	1.14449	0.766519	0.377974	0.00926223
SEMA7A	Semaphorin 7A, GPI membrane anchor (John Milton Hagen blood group)	0.499221	0.121542	0.377679	0.00639952
IAH1	Isoamyl acetate-hydrolyzing esterase 1 homolog (S. cerevisiae)	0.0836017	-0.293891	0.377492	0.0118007
ACPP	Acid phosphatase, prostate	0.941409	0.564576	0.376833	0.00269118
FLT3	Fms-related tyrosine kinase 3	-0.858322	-1.23502	0.3767	0.000506801
ST8SIA158		-0.308303	-0.684957	0.376653	0.0022266
MYL6	Myosin, light chain 6, alkali, smooth muscle and non-muscle	1.13677	0.760224	0.376548	0.00646752
KMO		0.202148	-0.174391	0.376539	7.69102e-06
TTYH3	Tweety homolog 3 (Drosophila)	0.261927	-0.114517	0.376444	0.00254175
LRRC46	Leucine rich repeat containing 46	0.904337	0.527903	0.376434	0.00110762
C7orf25	Chromosome 7 open reading frame 25	0.107663	-0.268563	0.376225	0.000199069
FMO4	Flavin containing monooxygenase 4	1.13211	0.755998	0.37611	0.00675782
NAGLU	N-acetylglucosaminidase, alpha- (Sanfilippo disease IIIB)	1.31526	0.939879	0.375384	0.0011534
LTBP2	Latent transforming growth factor beta binding protein 2	0.549875	0.175241	0.374635	0.00147767
ARX	Aristaless related homeobox	-0.203525	-0.578035	0.37451	0.00223504
NAGA	N-acetylgalactosaminidase, alpha-	1.13654	0.762198	0.374346	0.00124905
PFN4	Profilin family, member 4	1.44973	1.07539	0.374343	0.00873747
CHRNA6	Cholinergic receptor, nicotinic, alpha 6	0.171271	-0.202671	0.373942	0.000584437
AGTRAP	Angiotensin II receptor-associated protein	1.06577	0.691888	0.373885	0.00489258
ANKRD7		-0.0166603	-0.390498	0.373838	0.0103356
MSX1	Msh homeobox 1	0.884306	0.510748	0.373557	0.0124811
MAPK13	Mitogen-activated protein kinase 13	0.0817686	-0.291759	0.373528	0.00336673
RAB7L1	RAB7, member RAS oncogene family-like 1	0.992771	0.619567	0.373204	0.00638202
VAMP3	Vesicle-associated membrane protein 3 (cellubrevin)	0.692862	0.319808	0.373053	0.00585206
CD59	CD59 molecule, complement regulatory protein	0.0900104	-0.283003	0.373013	0.0114339
ELOVL1	Elongation of very long chain fatty acids (FEN1/Elo2, SUR4/Elo3, yeast)-like 1	0.200856	-0.171883	0.372739	0.00203912
ICAM2	Intercellular adhesion molecule 2	-0.269185	-0.641573	0.372388	0.00892938
IL6ST	Interleukin 6 signal transducer (gp130, oncostatin M receptor)	0.40326	0.0309355	0.372324	0.00959158
PPY	Pancreatic polypeptide	0.159729	-0.212434	0.372163	0.00012157
SLC25A13	Solute carrier family 25, member 13 (citrin)	1.4412	1.06957	0.371639	0.000558435
GNA12	Guanine nucleotide binding protein (G protein) alpha 12	0.930512	0.559096	0.371416	0.00126676
PSCD3	Pleckstrin homology, Sec7 and coiled-coil domains 3	0.74154	0.37031	0.37123	0.00401017
ARF4	ADP-ribosylation factor 4	0.928973	0.558186	0.370787	0.00185263
MSRB3	Methionine sulfoxide reductase B3	0.462401	0.0923636	0.370037	0.013335
HEYL	Hairy/enhancer-of-split related with YRPW motif-like	0.822708	0.453109	0.369599	0.00670169
PDLIM1	PDZ and LIM domain 1 (elfin)	0.841456	0.472022	0.369433	0.0049837
GCK	Glucokinase (hexokinase 4, maturity onset diabetes of the young 2)	0.285629	-0.0836838	0.369313	0.0103333
SMAD5OS	SMAD family member 5 opposite strand	1.05224	0.682959	0.369284	0.00669652
CYB561D2	Cytochrome b-561 domain containing 2	0.740724	0.371961	0.368763	0.000315693
ZC3H12A	Zinc finger CCCH-type containing 12A	0.500854	0.132155	0.368699	0.00049587
ICOSLG	Inducible T-cell co-stimulator ligand	-0.0702721	-0.438822	0.36855	3.15424e-07
SBDS	Shwachman-Bodian-Diamond syndrome	0.229544	-0.138237	0.367781	0.000289101
PMS2L3	Postmeiotic segregation increased 2-like 3	0.726919	0.359405	0.367515	4.07477e-05
GNS	Glucosamine (N-acetyl)-6-sulfatase (Sanfilippo disease IIID)	1.05434	0.687316	0.367027	0.00485604
MRLC2	Myosin regulatory light chain MRLC2	0.119443	-0.247224	0.366667	0.00063213
ATP1A1	ATPase, Na+/K+ transporting, alpha 1 polypeptide	-0.615626	-0.981564	0.365938	0.000272538
CHURC1	Churchill domain containing 1	0.180255	-0.185681	0.365936	0.0101418
TXNDC17	Thioredoxin domain containing 17	1.26135	0.895615	0.365735	0.0016602
HSPC171	HSPC171 protein	0.240363	-0.124642	0.365005	0.000450681
DNASE2	Deoxyribonuclease II, lysosomal	1.25982	0.894836	0.36498	0.0114954
SPDYA	Speedy homolog A (Drosophila)	0.201255	-0.163591	0.364846	0.00251248
RINT1	RAD50 interactor 1	1.14706	0.782939	0.364121	0.00787263
FTHL17	Ferritin, heavy polypeptide-like 17	-0.149562	-0.51364	0.364079	0.00567019
TTLL7	Tubulin tyrosine ligase-like family, member 7	-0.690829	-1.05473	0.363901	0.01021
ZBTB8OS	Zinc finger and BTB domain containing 8 opposite strand	0.251489	-0.112023	0.363512	0.000264965
TMOD3	Tropomodulin 3 (ubiquitous)	0.758906	0.395422	0.363484	0.00361528
IQCH	IQ motif containing H	0.542021	0.178674	0.363347	0.00495626
HTRA3	HtrA serine peptidase 3	0.433888	0.0705937	0.363294	0.00395879
OSTM1	Osteopetrosis associated transmembrane protein 1	0.241667	-0.121405	0.363072	0.000583711
HSCB		0.873158	0.510328	0.36283	0.0143446
PEX13	Peroxisome biogenesis factor 13	0.350934	-0.0112779	0.362212	0.000500991
RENBP	Renin binding protein	0.48322	0.122666	0.360555	0.00116125
ALG13	Asparagine-linked glycosylation 13 homolog (S. cerevisiae)	0.960252	0.599923	0.360329	0.0101674
PRDX4	Peroxiredoxin 4	1.83605	1.47573	0.360315	0.00867877
CCDC90A	Coiled-coil domain containing 90A	0.0974648	-0.262685	0.36015	0.00138812
NRP2	Neuropilin 2	0.985289	0.625766	0.359523	0.014637
ELF5	E74-like factor 5 (ets domain transcription factor)	0.422613	0.0633707	0.359242	0.000371859
QSOX1	Quiescin Q6 sulfhydryl oxidase 1	0.448394	0.0900276	0.358366	0.0143768
LPXN	Leupaxin	0.75054	0.392305	0.358235	0.00524604
IQSEC1	IQ motif and Sec7 domain 1	-1.46535	-1.82279	0.357444	0.00261158
CD40	CD40 molecule, TNF receptor superfamily member 5	0.61177	0.25444	0.35733	0.0112109
SLC16A1	Solute carrier family 16, member 1 (monocarboxylic acid transporter 1)	1.58032	1.22409	0.356237	0.00127422
MALT1	Mucosa associated lymphoid tissue lymphoma translocation gene 1	1.1104	0.754212	0.35619	0.003177
PMM2	Phosphomannomutase 2	0.804899	0.448739	0.35616	0.00091767
CXCL5	Chemokine (C-X-C motif) ligand 5	0.0461399	-0.309894	0.356034	0.000210631
HERPUD1	Homocysteine-inducible, endoplasmic reticulum stress-inducible, ubiquitin-like domain member 1	0.330749	-0.0250168	0.355766	0.0106283
C6orf57	Chromosome 6 open reading frame 57	-0.195737	-0.551477	0.35574	0.0046449
TMTC3	Transmembrane and tetratricopeptide repeat containing 3	0.412881	0.0573198	0.355562	0.00117961
C12orf5	Chromosome 12 open reading frame 5	0.718968	0.364141	0.354828	0.00594508
RCP9	Calcitonin gene-related peptide-receptor component protein	0.433622	0.0788149	0.354807	0.00423478
TRAM1	Translocation associated membrane protein 1	1.48218	1.12767	0.354509	0.00236334
PPM1M	Protein phosphatase 1M (PP2C domain containing)	-0.0789082	-0.433158	0.35425	0.0141781
SPPL2A	Signal peptide peptidase-like 2A	1.57666	1.22285	0.353807	0.00654725
AP3S1	Adaptor-related protein complex 3, sigma 1 subunit	-0.859562	-1.21299	0.353425	0.000105422
GTF2H5	General transcription factor IIH, polypeptide 5	0.0954631	-0.257768	0.353231	0.0023919
ANXA11	Annexin A11	-1.6507	-2.00364	0.352937	0.0145593
C6orf1	Chromosome 6 open reading frame 1	-0.676062	-1.02878	0.352716	0.0106784
SMYD2	SET and MYND domain containing 2	-0.661042	-1.01362	0.352576	0.00333637
TNFRSF11A	Tumor necrosis factor receptor superfamily, member 11a, NFKB activator	0.0448638	-0.307481	0.352345	0.00269259
FBXO36	F-box protein 36	0.325198	-0.0267189	0.351917	0.0087665
ST8SIA483		0.823907	0.472206	0.351701	0.000405232
ELK3	ELK3, ETS-domain protein (SRF accessory protein 2)	0.865164	0.513525	0.351639	0.00122108
RNF216L	Ring finger protein 216-like	0.526088	0.174453	0.351636	0.00141891
CXorf39	Chromosome X open reading frame 39	0.637948	0.286521	0.351427	0.0132491
FZD4	Frizzled homolog 4 (Drosophila)	0.351121	0.000416388	0.350705	0.00127159
ARMC9	Armadillo repeat containing 9	-0.466694	-0.816792	0.350098	0.000223878
DOK1	Docking protein 1, 62kDa (downstream of tyrosine kinase 1)	1.09919	0.749441	0.349744	0.00863924
SIL1	SIL1 homolog, endoplasmic reticulum chaperone (S. cerevisiae)	0.691762	0.342146	0.349617	0.0038608
EMILIN1	Elastin microfibril interfacer 1	0.989421	0.640004	0.349417	0.00774135
PARP3	Poly (ADP-ribose) polymerase family, member 3	0.493999	0.144619	0.34938	0.00789697
FOXJ1	Forkhead box J1	1.17747	0.828096	0.349377	0.0120001
ARMET	Arginine-rich, mutated in early stage tumors	1.24586	0.896852	0.349005	0.00826457
ZCCHC6	Zinc finger, CCHC domain containing 6	0.880977	0.532514	0.348463	0.00102585
MAP3K6	Mitogen-activated protein kinase kinase kinase 6	0.548475	0.200102	0.348373	0.0128046
MKL2	MKL/myocardin-like 2	-1.94577	-2.29382	0.348054	0.000471526
CCL23	Chemokine (C-C motif) ligand 23	0.573189	0.225138	0.348052	0.00218967
RGS3	Regulator of G-protein signaling 3	0.733077	0.385083	0.347994	0.00419807
C1orf122	Chromosome 1 open reading frame 122	-0.288051	-0.635354	0.347304	0.00668435
MRPL32	Mitochondrial ribosomal protein L32	0.252011	-0.0950535	0.347065	0.000210243
CDH26	Cadherin-like 26	0.694385	0.347344	0.347041	0.00117879
PRF1	Perforin 1 (pore forming protein)	0.686503	0.339487	0.347016	0.0046762
C7orf30	Chromosome 7 open reading frame 30	0.541728	0.195012	0.346716	0.000937884
MED10	Mediator complex subunit 10	-0.251816	-0.598458	0.346642	0.000511289
ABHD11	Abhydrolase domain containing 11	0.423334	0.0769091	0.346424	0.0045226
NDUFA4	NADH dehydrogenase (ubiquinone) 1 alpha subcomplex, 4, 9kDa	-1.1314	-1.47751	0.346109	0.0143404
VSTM1	V-set and transmembrane domain containing 1	-0.120858	-0.466736	0.345878	0.00076608
ATP1A3	ATPase, Na+/K+ transporting, alpha 3 polypeptide	-1.08806	-1.43358	0.345525	0.00352371
PTP4A2	Protein tyrosine phosphatase type IVA, member 2	0.0811369	-0.264218	0.345355	0.000216439
ST8SIA103		0.545	0.200352	0.344648	0.00604996
JAK2	Janus kinase 2 (a protein tyrosine kinase)	0.113767	-0.230726	0.344493	0.00565926
DNAJC3	DnaJ (Hsp40) homolog, subfamily C, member 3	-0.534677	-0.879167	0.34449	0.00127185
MGC35361	Hypothetical MGC35361	-0.410675	-0.754979	0.344303	0.00189711
TXNDC15	Thioredoxin domain containing 15	1.00652	0.662446	0.34407	0.00321857
PRELP	Proline/arginine-rich end leucine-rich repeat protein	-0.453806	-0.797755	0.34395	0.00383059
ST8SIA453		0.792838	0.449093	0.343745	0.00890514
ST8SIA586		-0.230109	-0.573823	0.343714	0.00421306
RNF14	Ring finger protein 14	0.07205	-0.271157	0.343207	0.00235166
SLC15A4	Solute carrier family 15, member 4	0.754	0.411041	0.342959	0.00329495
TMF1	TATA element modulatory factor 1	0.621563	0.278804	0.342759	0.000178748
CPEB2	Cytoplasmic polyadenylation element binding protein 2	0.0240134	-0.318664	0.342677	0.0078217
UTRN	Utrophin	0.0143944	-0.328253	0.342647	0.00580316
FLJ14803	Hypothetical protein FLJ14803	0.938313	0.595706	0.342607	0.000673214
WDR1	WD repeat domain 1	0.78939	0.447099	0.342291	0.00430681
ANKIB1	Ankyrin repeat and IBR domain containing 1	0.644987	0.304021	0.340966	0.00728135
CTSD	Cathepsin D	0.478968	0.138371	0.340598	0.0143481
DUS4L	Dihydrouridine synthase 4-like (S. cerevisiae)	1.11663	0.776263	0.340372	0.0113416
ZFP36L1	Zinc finger protein 36, C3H type-like 1	0.814452	0.474096	0.340357	0.00516021
MBD5	Methyl-CpG binding domain protein 5	0.885327	0.545055	0.340272	0.0131844
SRXN1	Sulfiredoxin 1 homolog (S. cerevisiae)	-0.352256	-0.692339	0.340083	0.0108776
SIRPG	Signal-regulatory protein gamma	0.147474	-0.192554	0.340028	0.000121408
ZDHHC12	Zinc finger, DHHC-type containing 12	0.639772	0.300083	0.339689	0.00255101
NR1I2	Nuclear receptor subfamily 1, group I, member 2	0.0823039	-0.257266	0.33957	0.00585306
MAPKAPK3	Mitogen-activated protein kinase-activated protein kinase 3	0.846681	0.508208	0.338473	0.00608431
ESR1	Estrogen receptor 1	-0.188241	-0.526599	0.338358	0.00552279
PELO	Pelota homolog (Drosophila)	0.100314	-0.237961	0.338274	0.000261175
RAB11FIP5	RAB11 family interacting protein 5 (class I)	-1.65557	-1.99359	0.338012	0.0113677
KIAA1432	KIAA1432	0.664801	0.326885	0.337916	0.00246839
ST8SIA126		1.08814	0.75026	0.337876	0.00474293
MOBKL2C	MOB1, Mps One Binder kinase activator-like 2C (yeast)	0.467397	0.129589	0.337808	0.00798221
SECTM1	Secreted and transmembrane 1	-0.0378351	-0.375636	0.337801	0.00436601
EFCAB3	EF-hand calcium binding domain 3	0.95451	0.616774	0.337736	0.00433565
BOLA3	BolA homolog 3 (E. coli)	-0.128661	-0.465765	0.337103	0.000799077
ST8SIA747		0.893242	0.556187	0.337054	0.00373952
GLT8D1	Glycosyltransferase 8 domain containing 1	0.606708	0.269801	0.336907	0.00168574
C10orf109	Chromosome 10 open reading frame 109	-1.06943	-1.40566	0.336229	0.00811902
CLIP1	CAP-GLY domain containing linker protein 1	-0.377983	-0.714083	0.336101	0.014503
CSGlcA-T	Chondroitin sulfate glucuronyltransferase	0.568605	0.233399	0.335206	0.000970909
FUT8	Fucosyltransferase 8 (alpha (1,6) fucosyltransferase)	-0.493378	-0.828544	0.335166	0.0128889
CCDC28A	Coiled-coil domain containing 28A	-1.25632	-1.59133	0.335012	0.00595757
ST8SIA798		-1.43259	-1.76735	0.334762	0.00676866
ACOT12	Acyl-CoA thioesterase 12	0.506926	0.173179	0.333747	0.0106745
FSTL3	Follistatin-like 3 (secreted glycoprotein)	0.277631	-0.055703	0.333334	0.00684447
SEC14L3	SEC14-like 3 (S. cerevisiae)	0.288404	-0.0445426	0.332947	0.00527421
EHBP1L1	EH domain binding protein 1-like 1	-0.740876	-1.07364	0.332761	0.010186
ZNF101	Zinc finger protein 101	0.651282	0.318524	0.332758	0.000305476
SMUG1	Single-strand-selective monofunctional uracil-DNA glycosylase 1	1.23805	0.905514	0.332531	0.00104289
PLXND1	Plexin D1	0.482061	0.149753	0.332309	0.00638715
WDR41	WD repeat domain 41	0.263783	-0.0683384	0.332122	0.00264746
SSBP1	Single-stranded DNA binding protein 1	0.649747	0.317758	0.331988	0.00279323
UBE2F		0.428016	0.0963487	0.331667	0.00524983
CPSF4	Cleavage and polyadenylation specific factor 4, 30kDa	0.925716	0.594494	0.331222	0.000783186
CHMP2B	Chromatin modifying protein 2B	-0.272871	-0.603416	0.330545	0.00300172
BCL2L12		1.28795	0.957624	0.330325	0.0114275
SEDLP	Spondyloepiphyseal dysplasia, late, pseudogene	0.606025	0.275836	0.330188	0.00389937
WIPF1	WAS/WASL interacting protein family, member 1	1.30635	0.976233	0.33012	0.00130513
NEU1	Sialidase 1 (lysosomal sialidase)	0.270836	-0.0582885	0.329124	0.000622816
IFNGR2	Interferon gamma receptor 2 (interferon gamma transducer 1)	0.688703	0.35965	0.329054	0.00529878
RNF148	Ring finger protein 148	-0.345244	-0.67423	0.328986	0.00561764
ACTB	Actin, beta	1.1162	0.787868	0.328327	0.00262518
RALBP1	RalA binding protein 1	-0.0976979	-0.424879	0.327181	0.0143488
KY	Kyphoscoliosis peptidase	-0.720987	-1.04753	0.326546	0.00180703
MICB	MHC class I polypeptide-related sequence B	0.185841	-0.140634	0.326475	0.00235185
ZDHHC4	Zinc finger, DHHC-type containing 4	0.61562	0.289336	0.326284	0.0020789
SEC22C	SEC22 vesicle trafficking protein homolog C (S. cerevisiae)	0.0786399	-0.246961	0.3256	0.000193309
CNTNAP1	Contactin associated protein 1	-1.76005	-2.08553	0.325483	0.00885529
PRRG1	Proline rich Gla (G-carboxyglutamic acid) 1	-0.491904	-0.817368	0.325464	0.00957149
SNX3	Sorting nexin 3	0.155906	-0.169458	0.325364	0.013626
DKFZP686E2158	Hypothetical protein LOC643155	0.829169	0.50442	0.324749	0.000827013
ABCC12	ATP-binding cassette, sub-family C (CFTR/MRP), member 12	-2.61953	-2.94402	0.324485	0.00620996
SELS	Selenoprotein S	0.826223	0.502076	0.324148	0.00183487
LAMP1	Lysosomal-associated membrane protein 1	0.447078	0.123489	0.323589	0.00438181
PSME2	Proteasome (prosome, macropain) activator subunit 2 (PA28 beta)	1.01445	0.691075	0.323371	0.0107431
ST8SIA780		0.0738592	-0.249317	0.323176	0.0129946
CD2AP	CD2-associated protein	0.570246	0.247337	0.322909	0.00668708
LACE1	Lactation elevated 1	0.623022	0.300486	0.322537	0.00370204
ST8SIA787		0.53337	0.211514	0.321856	0.00372017
CKM	Creatine kinase, muscle	0.700826	0.379371	0.321455	0.0037699
HEXA	Hexosaminidase A (alpha polypeptide)	0.793514	0.472185	0.321329	0.00199289
ST8SIA344		-0.225213	-0.546439	0.321226	0.000646485
CSF3R	Colony stimulating factor 3 receptor (granulocyte)	0.679491	0.358409	0.321082	0.0136528
FHOD1	Formin homology 2 domain containing 1	0.283069	-0.037474	0.320543	0.0120504
AMACR	Alpha-methylacyl-CoA racemase	-0.340514	-0.660883	0.320369	0.00898667
JAK3	Janus kinase 3 (a protein tyrosine kinase, leukocyte)	-0.548167	-0.86829	0.320122	5.2454e-05
COBLL1	COBL-like 1	0.305676	-0.0143992	0.320075	0.00732161
PIGO	Phosphatidylinositol glycan anchor biosynthesis, class O	0.556372	0.23778	0.318592	0.000731709
VNN3	Vanin 3	0.354034	0.0357198	0.318314	0.000517137
CCDC81	Coiled-coil domain containing 81	0.963815	0.64608	0.317735	0.00926479
ARL13B	ADP-ribosylation factor-like 13B	1.15501	0.837916	0.317093	0.00359353
EEA1	Early endosome antigen 1	0.842652	0.525605	0.317047	0.00481098
SLC33A1	Solute carrier family 33 (acetyl-CoA transporter), member 1	0.920171	0.603365	0.316805	0.0045733
P4HB	Procollagen-proline, 2-oxoglutarate 4-dioxygenase (proline 4-hydroxylase), beta polypeptide	1.00434	0.687825	0.316513	0.00174283
BUD31	BUD31 homolog (S. cerevisiae)	0.961095	0.645096	0.315998	0.0112366
MRAP	Melanocortin 2 receptor accessory protein	-0.249157	-0.564955	0.315798	0.00363018
C1GALT1C1	C1GALT1-specific chaperone 1	0.758173	0.442805	0.315367	0.00732363
LALBA	Lactalbumin, alpha-	0.0568978	-0.257652	0.31455	0.0146374
C7orf49	Chromosome 7 open reading frame 49	1.46641	1.15191	0.314502	0.00221835
IL4	Interleukin 4	0.893719	0.579518	0.314201	0.0108531
CMTM6	CKLF-like MARVEL transmembrane domain containing 6	1.56397	1.2498	0.314168	0.014549
LAPTM4A	Lysosomal-associated protein transmembrane 4 alpha	1.09643	0.782389	0.314045	0.0105797
ATP5E	ATP synthase, H+ transporting, mitochondrial F1 complex, epsilon subunit	0.313476	-0.000375125	0.313851	0.0123755
SP100	SP100 nuclear antigen	0.901488	0.587664	0.313824	0.00320529
HRBL	HIV-1 Rev binding protein-like	0.272266	-0.041311	0.313577	0.00291453
H1FOO	H1 histone family, member O, oocyte-specific	0.773422	0.460295	0.313127	0.00116529
KIAA1919	KIAA1919	0.30973	-0.00337369	0.313104	0.000221253
EOMES	Eomesodermin homolog (Xenopus laevis)	0.175553	-0.137425	0.312978	0.00236333
ITGB1	Integrin, beta 1 (fibronectin receptor, beta polypeptide, antigen CD29 includes MDF2, MSK12)	1.39202	1.07982	0.312197	0.0119777
PROK1	Prokineticin 1	0.171437	-0.140554	0.311991	0.000122979
C9orf6	Chromosome 9 open reading frame 6	0.622748	0.311213	0.311534	0.00276347
ATP5J2	ATP synthase, H+ transporting, mitochondrial F0 complex, subunit F2	0.1663	-0.145169	0.311469	0.00523488
ST8SIA169		0.261318	-0.0499399	0.311258	0.00114603
AP4M1	Adaptor-related protein complex 4, mu 1 subunit	0.572855	0.261753	0.311102	0.000645908
IL32	Interleukin 32	0.376874	0.0658439	0.31103	0.00763419
SORT1	Sortilin 1	-0.109035	-0.419996	0.310961	0.003059
IFNAR1	Interferon (alpha, beta and omega) receptor 1	0.830622	0.520709	0.309913	0.00676905
PCDHGA9		-0.436338	-0.746203	0.309865	0.00847446
IL10	Interleukin 10	0.560404	0.251166	0.309238	0.00872253
ST8SIA762		0.417074	0.108578	0.308496	0.00876311
ATP13A3	ATPase type 13A3	0.505282	0.196946	0.308336	0.0117905
GK3P	Glycerol kinase 3 pseudogene	0.61932	0.311217	0.308104	0.00675494
RHOQ	Ras homolog gene family, member Q	0.736442	0.428474	0.307969	0.00581711
PLA2R1	Phospholipase A2 receptor 1, 180kDa	0.179251	-0.128645	0.307896	0.00696383
GRAMD2	GRAM domain containing 2	-0.280313	-0.587576	0.307263	0.0102295
SEL1L	Sel-1 suppressor of lin-12-like (C. elegans)	-0.441716	-0.748938	0.307222	0.00476626
RNASEL	Ribonuclease L (2',5'-oligoisoadenylate synthetase-dependent)	0.266848	-0.0394561	0.306304	0.00386675
CCDC72	Coiled-coil domain containing 72	0.122602	-0.182292	0.304895	0.00728218
PLA2G12A	Phospholipase A2, group XIIA	0.387027	0.0826906	0.304337	0.00116906
CYB5D1	Cytochrome b5 domain containing 1	-0.138959	-0.442865	0.303906	0.00186827
GK	Glycerol kinase	0.349185	0.0460872	0.303098	0.00782937
GJA5	Gap junction protein, alpha 5, 40kDa	0.125093	-0.177642	0.302735	0.00984235
CANX	Calnexin	0.509279	0.207117	0.302162	0.00769586
FASLG	Fas ligand (TNF superfamily, member 6)	0.369565	0.0677016	0.301863	0.00330644
C4orf38	Chromosome 4 open reading frame 38	-0.31091	-0.612679	0.301769	0.00755972
NAGS	N-acetylglutamate synthase	0.315654	0.0147181	0.300936	0.00120858
ASCC3	Activating signal cointegrator 1 complex subunit 3	0.790475	0.490066	0.300409	0.00497475
GALNT7	UDP-N-acetyl-alpha-D-galactosamine:polypeptide N-acetylgalactosaminyltransferase 7 (GalNAc-T7)	0.713919	0.41358	0.300339	0.0102319
MAPK1	Mitogen-activated protein kinase 1	-0.386982	-0.687023	0.300041	0.0038236
UFM1	Ubiquitin-fold modifier 1	-0.326849	-0.626832	0.299983	0.00500801
FAM62B	Family with sequence similarity 62 (C2 domain containing) member B	-0.224195	-0.523806	0.299611	0.00214868
UROD	Uroporphyrinogen decarboxylase	0.0339561	-0.265423	0.299379	0.00617054
RAB43	RAB43, member RAS oncogene family	0.245879	-0.0534977	0.299377	0.00146807
CCRK	Cell cycle related kinase	-0.706998	-1.00618	0.299181	0.0120165
CCDC24	Coiled-coil domain containing 24	-0.453728	-0.752774	0.299046	0.00698548
SLC10A3	Solute carrier family 10 (sodium/bile acid cotransporter family), member 3	0.38615	0.0882113	0.297939	0.00292136
GALNT4	UDP-N-acetyl-alpha-D-galactosamine:polypeptide N-acetylgalactosaminyltransferase 4 (GalNAc-T4)	0.773421	0.475778	0.297642	0.00698693
DYNLL1	Dynein, light chain, LC8-type 1	-0.827582	-1.1248	0.297221	0.00366326
VPREB3	Pre-B lymphocyte gene 3	0.133239	-0.163787	0.297026	0.000587538
CAPZA1	Capping protein (actin filament) muscle Z-line, alpha 1	0.617589	0.320851	0.296738	0.00761364
CD6	CD6 molecule	-0.580197	-0.876601	0.296405	0.000620566
C21orf59	Chromosome 21 open reading frame 59	0.445884	0.149962	0.295922	0.00774949
EIF1	Eukaryotic translation initiation factor 1	0.0573754	-0.237802	0.295178	0.00665901
ST8SIA754		0.0288737	-0.266298	0.295172	0.00594852
DALRD3	DALR anticodon binding domain containing 3	0.106	-0.188672	0.294672	0.00558998
UEVLD	UEV and lactate/malate dehyrogenase domains	0.952173	0.657723	0.29445	0.00755897
LASS2	LAG1 homolog, ceramide synthase 2	0.908684	0.614262	0.294423	0.00616807
C10orf64		0.75677	0.462905	0.293865	0.00104338
RALA	V-ral simian leukemia viral oncogene homolog A (ras related)	0.622228	0.329176	0.293053	0.00445597
LOC641367	Hypothetical LOC641367	0.09426	-0.198729	0.292989	0.000686768
PSMG3	Proteasome (prosome, macropain) assembly chaperone 3	0.323841	0.0313973	0.292444	0.00818111
POMZP3	POM (POM121 homolog, rat) and ZP3 fusion	-0.376236	-0.668437	0.292201	0.00407017
PIGT	Phosphatidylinositol glycan anchor biosynthesis, class T	0.463286	0.171114	0.292173	0.0120479
ARSD	Arylsulfatase D	0.377667	0.0855406	0.292126	0.00227555
C17orf79	Chromosome 17 open reading frame 79	-0.880283	-1.17217	0.291889	0.00250902
CYP11A1	Cytochrome P450, family 11, subfamily A, polypeptide 1	-0.582028	-0.873774	0.291746	0.0128288
LOC643406	Hypothetical protein LOC643406	0.278603	-0.0122654	0.290868	0.00174863
BLVRA	Biliverdin reductase A	0.318798	0.0284681	0.29033	0.00298945
KREMEN1	Kringle containing transmembrane protein 1	-0.359405	-0.6493	0.289895	0.0114032
SNAPC1	Small nuclear RNA activating complex, polypeptide 1, 43kDa	1.3352	1.04573	0.289465	0.0135896
ST8SIA157		-0.286685	-0.576063	0.289378	0.0117838
MYD88	Myeloid differentiation primary response gene (88)	0.780429	0.491659	0.28877	0.00174644
HAT1	Histone acetyltransferase 1	1.46847	1.18063	0.287841	0.010111
RFK	Riboflavin kinase	-0.879169	-1.16693	0.28776	0.0120351
RYBP	RING1 and YY1 binding protein	-0.748749	-1.03632	0.287567	0.00623258
TSPAN4	Tetraspanin 4	0.834308	0.547478	0.286829	0.0112173
MGAT1	Mannosyl (alpha-1,3-)-glycoprotein beta-1,2-N-acetylglucosaminyltransferase	0.868585	0.5819	0.286684	0.00652515
ABHD9	Abhydrolase domain containing 9	-0.287936	-0.574001	0.286065	0.00474295
ICOS	Inducible T-cell co-stimulator	0.270473	-0.0154069	0.28588	0.0019259
FAM109B	Family with sequence similarity 109, member B	0.48051	0.194874	0.285637	0.00133224
NEK10	NIMA (never in mitosis gene a)- related kinase 10	-1.17473	-1.45992	0.285195	0.0101942
ST8SIA793		0.976272	0.691702	0.28457	0.0133687
MGC88374	Similar to CG32662-PA	-0.539131	-0.822618	0.283486	0.00287596
FAM86C		0.737659	0.45434	0.28332	0.00417701
RP5-821D11.2		-0.585487	-0.866113	0.280626	0.000775016
IFT20	Intraflagellar transport 20 homolog (Chlamydomonas)	0.94577	0.665163	0.280607	0.00813883
ST8SIA439		0.224564	-0.0559822	0.280546	0.00505597
HPS5	Hermansky-Pudlak syndrome 5	1.24981	0.96961	0.280204	0.00228731
SLC39A13	Solute carrier family 39 (zinc transporter), member 13	0.122278	-0.157905	0.280183	0.0142851
SLC30A7	Solute carrier family 30 (zinc transporter), member 7	1.16776	0.88824	0.279523	0.000584565
ARL8B	ADP-ribosylation factor-like 8B	-0.531639	-0.810991	0.279352	0.00328727
PSMA1	Proteasome (prosome, macropain) subunit, alpha type, 1	-0.0168506	-0.296056	0.279206	0.00612451
SLC24A2	Solute carrier family 24 (sodium/potassium/calcium exchanger), member 2	-0.295241	-0.574399	0.279158	0.00406509
C8orf40	Chromosome 8 open reading frame 40	0.119802	-0.159339	0.279141	0.00310152
COPB2	Coatomer protein complex, subunit beta 2 (beta prime)	1.04058	0.761605	0.278973	0.000371716
LOC100125556	Hypothetical LOC100125556	0.160778	-0.117379	0.278157	0.00466954
MAPBPIP	Mitogen-activated protein-binding protein-interacting protein	0.620074	0.342535	0.27754	0.00812503
LILRB4	Leukocyte immunoglobulin-like receptor, subfamily B (with TM and ITIM domains), member 4	0.65847	0.381131	0.277338	0.00594519
ORMDL2	ORM1-like 2 (S. cerevisiae)	0.972935	0.695909	0.277026	0.00618756
NFYA	Nuclear transcription factor Y, alpha	0.825326	0.548462	0.276864	0.00386819
GALNT6	UDP-N-acetyl-alpha-D-galactosamine:polypeptide N-acetylgalactosaminyltransferase 6 (GalNAc-T6)	-0.302419	-0.577416	0.274996	0.00621087
BTLA	B and T lymphocyte associated	0.557373	0.282586	0.274787	0.000722086
PCYT1A	Phosphate cytidylyltransferase 1, choline, alpha	0.529313	0.254657	0.274656	0.00688998
TREML2	Triggering receptor expressed on myeloid cells-like 2	0.358969	0.0844432	0.274526	0.00445281
TUSC2	Tumor suppressor candidate 2	-0.433984	-0.708436	0.274452	0.00489959
PPIA	Peptidylprolyl isomerase A (cyclophilin A)	-0.0245014	-0.298709	0.274208	0.00326095
DSTN	Destrin (actin depolymerizing factor)	-0.674842	-0.94893	0.274088	0.0116672
ULK4	Unc-51-like kinase 4 (C. elegans)	0.160225	-0.113183	0.273409	0.0012874
TMEM87B	Transmembrane protein 87B	1.04935	0.777015	0.272331	0.00578443
MRPS24		-0.0101063	-0.282391	0.272285	0.00595718
AGRP	Agouti related protein homolog (mouse)	0.174425	-0.0966647	0.27109	0.00335102
PMS2	PMS2 postmeiotic segregation increased 2 (S. cerevisiae)	0.605179	0.334349	0.27083	0.00117829
MRPL34	Mitochondrial ribosomal protein L34	-0.114196	-0.384797	0.270601	0.00605337
BAG4	BCL2-associated athanogene 4	-0.158351	-0.428804	0.270453	0.00488535
ATP6V1D	ATPase, H+ transporting, lysosomal 34kDa, V1 subunit D	-1.14518	-1.41384	0.268658	0.00474429
LBA1	Lupus brain antigen 1	-0.154565	-0.423021	0.268456	0.00035658
CCM2	Cerebral cavernous malformation 2	-0.573995	-0.842253	0.268258	0.00498189
WHDC1L1	WAS protein homology region 2 domain containing 1-like 1	-0.313813	-0.580831	0.267017	0.0141984
BBS9	Bardet-Biedl syndrome 9	0.713835	0.447871	0.265964	0.00249413
HEATR2	HEAT repeat containing 2	1.00998	0.744159	0.265825	0.00856765
WDFY2	WD repeat and FYVE domain containing 2	0.943016	0.677553	0.265463	0.00484798
SPCS1	Signal peptidase complex subunit 1 homolog (S. cerevisiae)	-0.0253619	-0.290478	0.265116	0.00570284
METTL8	Methyltransferase like 8	0.949486	0.6848	0.264686	0.012486
SLC25A30	Solute carrier family 25, member 30	0.259383	-0.00522566	0.264609	0.00163772
PTPN18	Protein tyrosine phosphatase, non-receptor type 18 (brain-derived)	0.225633	-0.0389327	0.264566	0.0072053
OLFML1	Olfactomedin-like 1	0.111063	-0.153298	0.264361	0.00253466
AFF1	AF4/FMR2 family, member 1	0.587649	0.323442	0.264207	0.00890169
KLHL10	Kelch-like 10 (Drosophila)	-0.69973	-0.963894	0.264165	0.000921019
RNH1	Ribonuclease/angiogenin inhibitor 1	0.0888897	-0.17525	0.26414	0.0130233
PTPRJ	Protein tyrosine phosphatase, receptor type, J	0.373202	0.10943	0.263772	0.00562327
ASB7	Ankyrin repeat and SOCS box-containing 7	0.287466	0.0241142	0.263352	0.00473144
INMT	Indolethylamine N-methyltransferase	0.599601	0.336268	0.263332	0.0144396
MS4A6E	Membrane-spanning 4-domains, subfamily A, member 6E	0.243174	-0.0198964	0.263071	0.00797499
FAM82B	Family with sequence similarity 82, member B	0.981513	0.718765	0.262747	0.0140827
DDX19A	DEAD (Asp-Glu-Ala-As) box polypeptide 19A	0.509252	0.246622	0.262631	0.00871755
GPR172B	G protein-coupled receptor 172B	0.195061	-0.0671747	0.262236	0.00526091
CFHR2	Complement factor H-related 2	0.162755	-0.0993699	0.262125	0.00616935
CHID1	Chitinase domain containing 1	0.102858	-0.158999	0.261857	0.0123354
MFSD5	Major facilitator superfamily domain containing 5	0.183373	-0.0772801	0.260653	0.00112111
VPS37A	Vacuolar protein sorting 37 homolog A (S. cerevisiae)	0.174817	-0.0841703	0.258987	0.000168605
PTGIR	Prostaglandin I2 (prostacyclin) receptor (IP)	0.645121	0.386448	0.258673	0.00382601
EXT2	Exostoses (multiple) 2	0.342777	0.0846133	0.258164	0.01192
ST8SIA732		0.678603	0.420453	0.25815	0.00613281
SEC24A	SEC24 related gene family, member A (S. cerevisiae)	0.892141	0.634588	0.257553	0.00671261
ALG2	Asparagine-linked glycosylation 2 homolog (S. cerevisiae, alpha-1,3-mannosyltransferase)	0.802694	0.545291	0.257403	0.00436373
SLC16A5	Solute carrier family 16, member 5 (monocarboxylic acid transporter 6)	0.13678	-0.119553	0.256334	0.0113251
IGHD		-0.0395513	-0.295374	0.255823	0.0039565
ST8SIA565		-0.399873	-0.655408	0.255535	0.00189136
BCAP31	B-cell receptor-associated protein 31	-0.0427075	-0.298133	0.255425	0.00585368
RNF181	Ring finger protein 181	0.356629	0.102174	0.254455	0.0137725
NPAL2	NIPA-like domain containing 2	-0.321051	-0.575097	0.254047	0.0115528
ZC3HAV1	Zinc finger CCCH-type, antiviral 1	1.25678	1.00307	0.253711	0.0110424
TSPAN9	Tetraspanin 9	0.439086	0.185445	0.25364	0.00489418
DUSP3	Dual specificity phosphatase 3 (vaccinia virus phosphatase VH1-related)	-0.649879	-0.902163	0.252284	0.00465312
DNAJC10	DnaJ (Hsp40) homolog, subfamily C, member 10	0.371477	0.120231	0.251246	0.00485868
RPE	Ribulose-5-phosphate-3-epimerase	0.770461	0.519743	0.250718	0.00317731
OPRL1	Opiate receptor-like 1	0.0195695	-0.230908	0.250477	0.00177422
FTSJ2	FtsJ homolog 2 (E. coli)	0.647584	0.397473	0.250111	0.00652276
PAFAH1B2	Platelet-activating factor acetylhydrolase, isoform Ib, beta subunit 30kDa	0.53061	0.280508	0.250102	0.0039393
MED8	Mediator complex subunit 8	0.100653	-0.149142	0.249795	0.00442409
C7orf28B	Chromosome 7 open reading frame 28B	0.750277	0.50138	0.248897	0.00434203
ERP29	Endoplasmic reticulum protein 29	0.363	0.114189	0.248811	0.00363259
KIAA1033	KIAA1033	0.91105	0.662848	0.248202	0.0146181
ST8SIA753		0.277915	0.0297442	0.24817	0.0070459
GPR132	G protein-coupled receptor 132	0.268767	0.0206907	0.248077	0.00181867
LOC124512	Hypothetical protein LOC124512	0.834095	0.586297	0.247798	0.00450615
PTPN7	Protein tyrosine phosphatase, non-receptor type 7	0.3951	0.147426	0.247674	0.00623342
MYO7A	Myosin VIIA	0.328866	0.0821197	0.246746	0.0143435
ATG7	ATG7 autophagy related 7 homolog (S. cerevisiae)	-0.35731	-0.603326	0.246016	0.00474467
ST8SIA106		0.375622	0.129813	0.245808	0.00554725
PRR13	Proline rich 13	-0.146002	-0.391506	0.245504	0.000866407
SLC31A1	Solute carrier family 31 (copper transporters), member 1	0.241032	-0.00425573	0.245288	0.00852166
ZCCHC9	Zinc finger, CCHC domain containing 9	0.816308	0.572331	0.243976	0.0103685
SLC25A19	Solute carrier family 25 (mitochondrial thiamine pyrophosphate carrier), member 19	0.478766	0.235853	0.242913	0.0145094
KIF26B	Kinesin family member 26B	-0.0290918	-0.271599	0.242507	0.0111234
VCPIP1	Valosin containing protein (p97)/p47 complex interacting protein 1	0.609147	0.36675	0.242397	0.0119239
SLC35A2	Solute carrier family 35 (UDP-galactose transporter), member A2	-0.0204066	-0.262341	0.241935	0.000619198
CYBASC3	Cytochrome b, ascorbate dependent 3	0.155737	-0.0855329	0.24127	0.00449124
CASP10	Caspase 10, apoptosis-related cysteine peptidase	0.406773	0.165716	0.241057	0.0108713
JPH2	Junctophilin 2	0.405608	0.165566	0.240042	0.00340245
IL16	Interleukin 16 (lymphocyte chemoattractant factor)	0.38162	0.141636	0.239984	0.0047812
HRB	HIV-1 Rev binding protein	0.236705	-0.00223572	0.238941	0.00252199
GRPEL1	GrpE-like 1, mitochondrial (E. coli)	-0.255875	-0.494557	0.238682	0.0136463
PRKRIP1	PRKR interacting protein 1 (IL11 inducible)	0.700411	0.462112	0.238299	0.00990419
FCAR	Fc fragment of IgA, receptor for	0.310172	0.0725289	0.237643	0.00482162
TNS1	Tensin 1	0.476041	0.238863	0.237177	0.00536976
ST8SIA779		0.895595	0.659131	0.236464	0.00174061
LILRA5		0.541087	0.304957	0.236131	0.00768343
ACHE	Acetylcholinesterase (Yt blood group)	0.0777115	-0.158027	0.235739	0.00421129
KLF7	Kruppel-like factor 7 (ubiquitous)	0.415214	0.18101	0.234203	0.0103931
CSNK1D	Casein kinase 1, delta	0.819044	0.585062	0.233982	0.00145333
FAM91A1	Family with sequence similarity 91, member A1	0.529535	0.296092	0.233442	0.011326
SLMAP	Sarcolemma associated protein	0.0999689	-0.132991	0.23296	0.00366338
SRPR	Signal recognition particle receptor ('docking protein')	-0.118435	-0.35109	0.232655	0.00659017
TRIP11	Thyroid hormone receptor interactor 11	0.613966	0.381319	0.232647	0.00469429
CRELD2	Cysteine-rich with EGF-like domains 2	0.311259	0.0792757	0.231984	0.00797496
LOC149837	Hypothetical LOC149837	0.27469	0.0431584	0.231532	0.00504052
ST8SIA35		0.251693	0.020789	0.230904	0.0106351
CPA1	Carboxypeptidase A1 (pancreatic)	0.122081	-0.108216	0.230297	0.0021147
PTPN1	Protein tyrosine phosphatase, non-receptor type 1	0.15094	-0.0783422	0.229282	0.00840679
MDS1	Myelodysplasia syndrome 1	0.0588657	-0.168996	0.227862	0.013593
SP1	Sp1 transcription factor	0.996593	0.769964	0.226629	0.00970777
ETF1	Eukaryotic translation termination factor 1	0.135854	-0.0905419	0.226396	0.00305568
IFRD2	Interferon-related developmental regulator 2	0.554596	0.330073	0.224522	0.00653789
SRP19	Signal recognition particle 19kDa	-0.0705567	-0.294384	0.223828	0.00459266
BCL7B	B-cell CLL/lymphoma 7B	-0.0810959	-0.304876	0.22378	0.00537615
EDA2R	Ectodysplasin A2 receptor	0.323737	0.101143	0.222594	0.00260472
OAZ1	Ornithine decarboxylase antizyme 1	-0.652891	-0.875019	0.222128	0.0129692
EHBP1	EH domain binding protein 1	-0.40646	-0.624327	0.217867	0.0048194
LRRFIP1	Leucine rich repeat (in FLII) interacting protein 1	0.411902	0.1941	0.217802	0.00138794
FAM62A	Family with sequence similarity 62 (C2 domain containing), member A	0.0512038	-0.166554	0.217757	0.00318108
SEC61B	Sec61 beta subunit	0.658992	0.441696	0.217296	0.00808019
RECK	Reversion-inducing-cysteine-rich protein with kazal motifs	0.3878	0.171375	0.216425	0.00662449
COPB1	Coatomer protein complex, subunit beta 1	0.793126	0.578228	0.214898	0.0101675
EAF1	ELL associated factor 1	0.329954	0.116464	0.21349	0.0092647
ATG4A	ATG4 autophagy related 4 homolog A (S. cerevisiae)	0.852702	0.640146	0.212556	0.0112712
ATG12	ATG12 autophagy related 12 homolog (S. cerevisiae)	0.421194	0.20923	0.211965	0.00567739
LBP	Lipopolysaccharide binding protein	-0.690932	-0.902848	0.211917	0.0100896
SLC46A2	Solute carrier family 46, member 2	-0.741835	-0.953685	0.21185	0.0067351
C9orf119	Chromosome 9 open reading frame 119	0.479426	0.26986	0.209566	0.0076359
USO1	USO1 homolog, vesicle docking protein (yeast)	-0.244231	-0.453357	0.209126	0.0023198
RIOK3	RIO kinase 3 (yeast)	0.282029	0.0755611	0.206468	0.0138911
ACTR2	ARP2 actin-related protein 2 homolog (yeast)	0.103619	-0.10168	0.205299	0.00813339
MTHFD1L	Methylenetetrahydrofolate dehydrogenase (NADP+ dependent) 1-like	0.0888949	-0.115351	0.204246	0.0111222
CPNE9	Copine family member IX	-2.15718	-2.35998	0.2028	0.0121705
RAB10	RAB10, member RAS oncogene family	0.663837	0.463371	0.200467	0.00662173
HGSNAT	Heparan-alpha-glucosaminide N-acetyltransferase	0.0395577	-0.159506	0.199063	0.00274705
NFKB1	Nuclear factor of kappa light polypeptide gene enhancer in B-cells 1 (p105)	0.726844	0.52931	0.197534	0.0122333
ELA1	Elastase 1, pancreatic	0.0999262	-0.0975153	0.197442	0.00239319
SLC34A2	Solute carrier family 34 (sodium phosphate), member 2	0.22204	0.0254253	0.196615	0.00947269
IL1F5	Interleukin 1 family, member 5 (delta)	0.0569742	-0.13956	0.196534	0.0145778
HCRTR1	Hypocretin (orexin) receptor 1	0.0721637	-0.120117	0.192281	0.00199471
OR1M1	Olfactory receptor, family 1, subfamily M, member 1	-0.0280791	-0.218741	0.190662	0.00157054
VPS36	Vacuolar protein sorting 36 homolog (S. cerevisiae)	-0.0503061	-0.240411	0.190105	0.00903876
ST8SIA188		0.293355	0.104309	0.189046	0.0143924
CTNNA1	Catenin (cadherin-associated protein), alpha 1, 102kDa	0.741226	0.553339	0.187887	0.0029629
FAM105B	Family with sequence similarity 105, member B	0.392783	0.205341	0.187442	0.00571964
WBSCR16	Williams-Beuren syndrome chromosome region 16	0.527454	0.341404	0.18605	0.00213687
ZBTB32	Zinc finger and BTB domain containing 32	0.0806017	-0.105435	0.186037	0.000982928
UBE2Z	Ubiquitin-conjugating enzyme E2Z	-0.279831	-0.46508	0.185249	0.00517992
ARPC2	Actin related protein 2/3 complex, subunit 2, 34kDa	0.184098	0.00208784	0.182011	0.00726392
AGPS	Alkylglycerone phosphate synthase	0.835538	0.653668	0.18187	0.0145366
SRFBP1	Serum response factor binding protein 1	0.471978	0.290403	0.181575	0.0117661
GOSR2	Golgi SNAP receptor complex member 2	0.0373009	-0.141934	0.179235	0.0118719
PPP2R1B	Protein phosphatase 2 (formerly 2A), regulatory subunit A, beta isoform	0.530288	0.354601	0.175687	0.00926306
TULP2	Tubby like protein 2	-0.0983696	-0.273727	0.175357	0.00583187
GPR45	G protein-coupled receptor 45	-0.057615	-0.223553	0.165938	0.0121685
C6orf153	Chromosome 6 open reading frame 153	0.261168	0.0958222	0.165346	0.00996907
C17orf38	Chromosome 17 open reading frame 38	0.161804	-0.00300865	0.164813	0.0115973
C20orf165	Chromosome 20 open reading frame 165	0.262292	0.0984638	0.163828	0.00519069
DCUN1D3	DCN1, defective in cullin neddylation 1, domain containing 3 (S. cerevisiae)	-0.129098	-0.291459	0.16236	0.00769723
SFTPG	Surfactant associated protein G	0.0340576	-0.126334	0.160392	0.00585224
CPA2	Carboxypeptidase A2 (pancreatic)	0.115937	-0.0349225	0.15086	0.00677078
OR8U1		0.0853328	-0.0626902	0.148023	0.00843223
INS	Insulin	-0.180878	-0.328136	0.147258	0.0085631
PRM2	Protamine 2	-0.206261	-0.333731	0.127471	0.00986473
Down regulated genes in High risk
RANBP17	RAN binding protein 17	-1.2382	0.448944	-1.68714	6.09914e-05
CBLN1	Cerebellin 1 precursor	-3.30604	-1.79964	-1.50641	0.000136089
ST8SIA175		-2.66676	-1.25842	-1.40833	0.0108286
INA	Internexin neuronal intermediate filament protein, alpha	-5.08993	-3.69961	-1.39032	0.00051757
KCND2	Potassium voltage-gated channel, Shal-related subfamily, member 2	-1.2908	0.0491011	-1.3399	0.00109019
H2AFY2	H2A histone family, member Y2	-0.884915	0.454574	-1.33949	1.96803e-05
SSTR1	Somatostatin receptor 1	-5.9179	-4.59431	-1.32359	0.0143434
DLL3	Delta-like 3 (Drosophila)	0.352504	1.628	-1.2755	0.00141276
NDN	Necdin homolog (mouse)	-2.68377	-1.44693	-1.23684	0.000195455
PAK7	P21(CDKN1A)-activated kinase 7	-3.53194	-2.29593	-1.23601	0.00287704
C1QL1	Complement component 1, q subcomponent-like 1	1.10146	2.3357	-1.23424	8.05932e-05
DCX	Doublecortex; lissencephaly, X-linked (doublecortin)	-0.00463009	1.22276	-1.22739	0.00663238
NTN4	Netrin 4	-2.09032	-0.89148	-1.19884	0.00143539
PABPC5	Poly(A) binding protein, cytoplasmic 5	-0.511928	0.685965	-1.19789	0.00101228
[truncated: 1,130 more rows]
